# Supplementary material for: The Transcription Factor ERG Regulates Super-Enhancers Associated With an Endothelial-Specific Gene Expression Program
Source: PubMed Central journal article supplement (PMC6493686; doi:10.1161/circresaha.118.313788), 2019-03-20
Supplement: res-124-1337-s001.pdf [file res-124-1337-s001.pdf]

## SUPPLEMENTAL MATERIAL

### Expanded Methods Section

#### Primary endothelial cells and VCaP cell lines

Pooled human umbilical vein endothelial cells (HUVEC) were purchased from Lonza (Wokingham, United Kingdom) and cultured in EGM-2 media (Lonza) or isolated from umbilical cords, as previously described<sup>1</sup> and cultured in M199 media. Cells were used up to passage 4. The prostate cancer cell line VCaP were obtained from American Type Culture Collection (ATCC) and cultured in DMEM supplemented with 10 % fetal bovine serum (Biosera, Labtech).

#### Gene silencing and validation by RT-qPCR and immunoblotting

HUVEC were cultured on 1% gelatin in EGM2 and transfected with 20 nM siRNA against ERG exon 6 (Qiagen; 5'-CAGATCCTACGCTATGGAGTA-3') or 20 nM AllStars Negative Control siRNA (Qiagen) using AtuFECT01 lipid (1 µg/ml, Silence Therapeutics, Berlin, Germany). VCaP cells were transfected using 100 nM siRNA targeting exon 7 of ERG (Invitrogen; 5'-ACTCTCCACGGTTAATGCATGCTAG-3') or Stealth negative control siRNA (Invitrogen) using Lipofectamine RNAiMAX (Invitrogen). SiRNA treatments were carried out for 48 hrs. RNA was extracted from siRNA-treated HUVEC using the RNeasy kit (Qiagen). Synthesis of cDNA was carried out using Superscript III Reverse Transcriptase (Invitrogen). Quantitative real-time PCR was performed on a Bio-Rad CFX96 system using PerfeCTa SYBR Green Fastmix (Quanta Biosciences). Sequences of the oligonucleotides used for qPCR are listed in Online Table IV.

In some experiments, HUVEC were transfected with siRNA to ERG or Ctrl, as above for 48 hr. Cells were fixed in 4% formaldehyde and cell pellets collected for chromatin immunoprecipitation (ChIP) sequencing for H3K27ac and MED1.

Whole cell protein lysates were prepared from HUVEC using CellLytic reagent (Sigma). Immunoblotting of cell lysates was performed according to standard conditions. Immunoblots were labelled with the following primary antibodies: anti-ERG (ab133264, 1:1000, Abcam) and anti-GAPDH (MAB374, 1:10000, Millipore). Primary antibodies were detected using fluorescently labelled secondary antibodies: goat anti-rabbit IgG DyLight 680 and goat anti-mouse IgG Dylight 800 (Thermo Scientific). Detection and quantification of fluorescence intensity were performed using an Odyssey® CLx imaging system (LI-COR Biosciences, Lincoln) and Odyssey® Image Studio v4.0 software.

#### Plasmid Transfections and Reporter Assays

A 1.2 kb DNA fragment containing the *CDH5* promoter sequence was cloned into pGL4.10 luciferase reporter vector (Promega), as previously described<sup>1</sup>. Three putative *CDH5* enhancers (E1, E2 and E4) were amplified by PCR from human genomic DNA and cloned into *Sall* and *Bam*HI sites of pGL4.10 located approximately 2 kb upstream of the *CDH5* promoter insert. Mutation of the putative ERG DNA binding

sites in the *CDH5* E4 enhancer region was carried out using QuikChange Lightning Multi Site-Directed Mutagenesis Kit (Agilent, Berkshire, UK), according to the manufacturer's instructions. In total, nine AGGAA motifs were changed to ACCAA to eliminate the ERG DNA binding motifs present within the E4 region. Sequences of the mutagenic oligonucleotides are listed in Online Table IV.

HUVEC were plated into a 24-well plate 24 h before transfection in EGM2 media. Cells were transiently transfected with plasmid DNA using GeneJuice transfection reagent (Merck Chemicals, Nottingham, UK), according to the manufacturer's instructions. For transactivation assays, the *CDH5* promoter reporter constructs were co-transfected into cells along with *Renilla* luciferase and either an ERG cDNA expression plasmid (pcDNA-ERG) or an empty plasmid (pcDNA3.1). Luciferase reporter activity was normalized to the internal *Renilla* luciferase control and is expressed relative to pcDNA3.1 empty vector control using the Dual-Luciferase Reporter Assay System (Promega) and a Synergy HT microplate reader.

### Chromatin immunoprecipitation (ChIP)-qPCR

ChIP experiments were performed using the ChIP-IT express kit (Active Motif). HUVEC transfected with control or ERG siRNA were cross-linked with 1 % formaldehyde. Chromatin was sheared for four cycles of 30s on and 30s off using a Bioruptor ICD-200 ultrasound sonicator (Diagenode). Generated fragments of 200-1,000 bp were chromatin immunoprecipitated using 2 µg anti-H3K27ac (cat no. 39133, Active Motif) and 3 µg anti-p300 (ab14984, Abcam) antibodies. The respective negative controls were rabbit IgG (PP64, Chemicon, Millipore) and mouse IgG (12-371, Millipore). QPCR for selected genomic regions were performed on immunoprecipitated DNA using primers listed in Online Table III. Statistical significance was determined using a two-tailed paired sample t-test in R with a statistical significance cut-off p-value < 0.05. Data were plotted using Prism 8.0 (Graph Pad).

### ChIP sequencing

ChIP assays using chromatin from pooled HUVEC ( $10^7$  cells) cultured in EGM2 media were performed using 2 µg of rabbit polyclonal antibody against ERG (sc-354X, Santa Cruz Biotechnology), as described<sup>2</sup>, with minor modifications by introducing an additional washing step with high salt buffer (0.1 % SDS, 1 % Triton X-100, 2 mM EDTA, 20 mM Tris-HCl, 500 mM NaCl). Immunoprecipitated chromatin was validated by quantitative real-time polymerase chain reaction (qPCR) with primers to previously characterized ERG-bound loci (*CDH5*, *ICAM1*). QPCR was performed using PerfeCTa SYBR Green Fastmix (Quanta Biosciences) on a Bio-Rad CFX96 system. See Online Table III for list of oligonucleotides used for ChIP experiments in this study. Library generation was performed using TruSeq ChIP Sample Prep Kit (Illumina). In brief, 10 ng DNA ends were polished, 5'-phosphorylated, and 3'-dATP added before genomic adapters were ligated onto the samples, following the manufacturer's instructions (Illumina). A library was also generated for an input sample which was an aliquot of sonicated cell lysate with no subsequent immunoprecipitation step. Agarose gel electrophoresis showed that the size fractionated ligated DNA migrated at 250–300 bp. The DNA libraries were amplified by PCR and sequenced using the Illumina HiSeq 2000.

H3K27ac and MED1 ChIP-seq in HUVEC were performed using a custom protocol (Active Motif Inc). Immunoprecipitation was carried out with 4 µg anti-H3K27ac (cat no. 39133, Active Motif) and 5 µg anti-MED1 (A300-793A, Bethyl Laboratories) antibodies. H3K27ac and MED1 ChIP and input libraries were prepared for sequencing on an Illumina NextSeq 500 platform.

### ChIP-seq dataset analyses

Fastq files generated from sequencing were mapped to the human reference genome (build hg19) using Bowtie 2 with default parameters, to produce SAM files<sup>3</sup>. SAM files were converted to BAM files and subsequently sorted and indexed using SAMTools<sup>4</sup>. Peak calling on aligned sequencing data was performed using Model-based Analysis of ChIP-seq (MACS version 2.1.2)<sup>5</sup> with input datasets as the control. To identify transcription factor and co-factor binding sites (e.g. ERG, MED1) a cutoff detection p-value of 1e-5 was used, whereas for histone modifications a cutoff detection p-value of 1e-9 was used. Called peaks overlapping ENCODE blacklisted genomic regions<sup>6</sup> were excluded. BAM files were also converted to Bedgraph and then to BigWig using genomeCoverageBed and wigToBigWig from BedTools, respectively<sup>7</sup>. Tracks were visualized using the UCSC Genome Browser database (<https://genome.ucsc.edu>). ChIP-seq dataset annotation was performed using the Bioconductor package ChIPseeker<sup>8</sup> in R. Peak-to-gene annotation is based on the peak genomic region and distance to the nearest peak.

Sequencing data generated in this study (ChIP-Seq datasets for ERG, H3K27ac and MED1 in HUVEC) can be downloaded from the NCBI Gene Expression Omnibus (GEO) portal, accession number GSE124893.

Publicly available data were downloaded as fastq files from the European Nucleotide Archive (ENA) and processed as described above. All datasets accessed or generated in this study are listed in Online Table IX. Genome-wide ChIP-seq data for histone modifications and DNase I hypersensitivity in HUVEC were obtained from the ENCODE/Broad Institute under GEO accession number GSE29611. ChIP-seq data for other transcription factors: GATA2, cFOS and cJUN were analyzed (GSE31477). ChIP-seq datasets for VCaP cells were obtained from published sources: ERG from *Chng et al.* (GSE28951), ERG from *Yu et al.* (GSE14092), H3K27ac (GSE55064), H3K4me1 and H3K27me3 (GSE14092).

### Gene expression profiling

Human transcriptome profiling datasets following knockdown of ERG were obtained from Birdsey *et al.*<sup>9</sup> for HUVEC (GSE32984) and Wang *et al.*<sup>10</sup> for ERG:TMPRSS2 fusion-positive VCaP prostate cancer cells (GSE53994). Differential expression analysis of the Affymetrix and Illumina BeadChip microarray datasets were performed in R version 3.2.4 using the Limma package<sup>11</sup>. The analysis considered significant differentially expressed genes with a Benjamini and Hochberg adjusted p-value < 0.10 which allowed a representational proportion of potentially meaningful gene expression changes to be validated. Heatmaps to visualise gene expression changes were plotted in R.

## Defining super-enhancers

Enhancer regions were identified by profiling H3K27ac and H3K4me1 ChIP-Seq enrichment in HUVEC using the method by Loven *et al.*<sup>12</sup>. We used the ROSE algorithm to define super-enhancers<sup>12,13</sup>. Briefly, active enhancers spaced by < 12.5kb and located further than 2 kb from annotated promoters were concatenated. The ChIP-seq occupancy of H3K27ac in reads per million per bp (rpm/bp) was used to separate super-enhancers from typical enhancers by ranking stitched enhancers based on an increasing H3K27ac ChIP-seq signal. The inflection point provided a cut-off to define super-enhancers. An analogous procedure was used to define super-enhancer regions by enrichment of ERG at enhancers. Super-enhancer associated genes were assigned as described earlier using ChIPseeker.

## Analysis of genomic regions

ChIP-seq data for correlation, heatmap and aggregate plots were normalized to input data using the bamCompare tool in deepTools<sup>14</sup> and reported as log<sub>2</sub> of the ratio. Resulting bigWig files were used to obtain a multiBigwigSummary in deepTools from which correlations were plotted in R using the ggplot2 package. Scores in defined genomic regions were calculated from computeMatrix to generate the heatmaps in Figure 6B and Online Figure VIIC.

To generate randomly shuffled genomic intervals to serve as a background for null hypothesis testing, shuffleBED from BEDTools<sup>7</sup> was used. For Figure 1D size-matched regions (relative to the true genomic regions identified by histone modifications) were obtained across the hg19 reference genome. Overlap between genomic regions of different peak sets were compared using BEDTools intersect<sup>7</sup>.

ChIP-seq peak annotations in Figure 4D were visualised using the ChIPseeker<sup>10</sup> function *plotDistToTSS*.

Hypergeometric distribution testing to compare the overlap of promoters and enhancers between HUVEC and VCaP cells in Figure 4E used genome-wide occurrences of promoter and enhancer regions as the expected (background) frequency. Promoter regions were those defined by RefSeq annotations from NCBI<sup>15</sup> and enhancers were from the FANTOM5 project using Cap Analysis of Gene Expression (CAGE)<sup>16</sup>.

## Functional enrichment and motif analysis

GSEA software (v2.2.0) from the Broad Institute at MIT<sup>17</sup> was used to identify how gene sets distribute in gene lists ranked by either microarray gene expression fold change values or by H3K27ac ChIP-seq enrichment on enhancers. The significance of the normalized enrichment score (NES) was based on a p-value adjusted for multiple comparisons and a false discovery rate (FDR).

To find the most enriched motifs in a given peak set the 'findMotifsGenome.pl' script from HOMER was performed<sup>18</sup>. For transcription factor binding sites the genomic interval  $\pm 200$ bp from the center of the binding site was used. For H3K27ac regions the exact region size was analyzed. The script adopts a set of sequences from the hg19 reference genome build as a background control that is matched in size and GC

content. The significance of enriched motifs reported is reflected in the number and size of genomic regions assessed.

To identify transcription factor motifs for ERG, GATA2, cFOS and cJUN across the human reference genome hg19, the scanMotifGenomeWide.pl script was applied from HOMER<sup>18</sup>.

### **Differential binding analysis**

Tag directories of ChIP-seq alignment files were generated using the makeTagDirectory command in HOMER. Called H3K27ac peaks assigned using MACS (cutoff detection p-value of 1e-9) in the control siRNA (siCtl) sample. These were assessed by getDifferentialPeaks to define loss and gain H3K27ac regions. The command was used to determine the peaks with more or less density tags in the siCtl dataset relative to the siERG dataset. Differential peaks were reported with log<sub>2</sub> fold changes and a cumulative Poisson p-value < 0.0001. Similarly, this command was used to find differential super-enhancers in the control siRNA super-enhancer set relative to siERG. Volcano plots were produced with log<sub>2</sub> fold changes and p-value cutoffs in R.

### **Functional annotation analyses**

Biological functions were assigned to regulatory regions using Genomic Regions Enrichment of Annotations Tool (GREAT)<sup>19</sup> with enriched gene ontology (GO) Biological Processes or MSigDB Pathways reported at a significance cutoff FDR < 0.001. Biological network pathways for Online Figure IVD were derived from the Reactome database<sup>20</sup>.

### **GWAS SNP enrichment analysis**

To perform GWAS SNP enrichment analysis, the R package traseR was used<sup>21</sup>. SNP-trait associations were obtained by combining dbGaP<sup>22</sup> and NHGRI GWAS Catalog<sup>23</sup>. We also considered SNPs in LD from the 1000 Genomes Project ( $r^2 > 0.8$ , and located within 100kb of the lead SNP) giving a total of 78,247 unique trait-associated SNPs. Background SNPs obtained from Utah residents with ancestry from Northern and Western Europe (CEU) population, available from the 1000 Genomes Project<sup>24</sup>, were used for hypothesis testing to assess the enrichment of trait-associated SNPs in genomic intervals of ERG super-enhancers, ERG binding loci and ERG-bound enhancer in HUVEC. The enrichment test follows the assumptions of the null hypothesis where the number of observed disease-associated SNPs out of background SNPs in ERG genomic intervals follows a binomial distribution with probability equal to the proportion of all genome-wide disease-associated SNPs out of background SNPs. Significance of enrichment was tested by binomial distribution. Analysis was performed for the enrichment of a select 10 trait class categories and all 573 available traits. A statistical p-value < 0.05 was used to as a threshold cutoff for significance. To provide a background to test the null hypothesis that random genomic intervals were significantly enriched for disease-associated SNPs we generated chromosome and size matched genomic regions (relative to ERG super-enhancers, ERG binding loci and ERG-bound enhancers) using shuffleBED from BEDTools<sup>7</sup>. These regions were also excluded from repressed (high H3K27me3) chromatin states in the HUVEC genome to provide a more rigorous test set.

## Statistical Analyses

All statistical analyses were performed in R. Associated statistics for specific analyses are mentioned elsewhere in the Methods. Fisher's exact test is performed across contingency tables when sample sizes were small (less than ~1000) and a Chi-squared test for larger sample sizes (more than 1000). For data represented in a boxplot the sample distribution was tested for normality using a Shapiro-Wilk test. All data were found to be significantly not normally distributed and therefore a non-parametric test was used to test for significance between different groups. A Wilcoxon sum-ranks test was performed when comparing two groups. A Kruskal-Wallis test was used when comparing multiple groups (more than two) followed by a Wilcoxon sum-ranks test as the post-hoc test.

## Reference List

1. Birdsey GM, Dryden NH, Amsellem V, Gebhardt F, Sahnun K, Haskard DO, Dejana E, Mason JC, Randi AM. Transcription factor erg regulates angiogenesis and endothelial apoptosis through ve-cadherin. *Blood*. 2008;111:3498-3506
2. Wilson NK, Foster SD, Wang X, Knezevic K, Schutte J, Kaimakis P, Chilarska PM, Kinston S, Ouwehand WH, Dzierzak E, Pimanda JE, de Bruijn MF, Gottgens B. Combinatorial transcriptional control in blood stem/progenitor cells: Genome-wide analysis of ten major transcriptional regulators. *Cell Stem Cell*. 2010;7:532-544
3. Langmead B, Salzberg SL. Fast gapped-read alignment with bowtie 2. *Nat Methods*. 2012;9:357-359
4. Li H, Handsaker B, Wysoker A, Fennell T, Ruan J, Homer N, Marth G, Abecasis G, Durbin R. The sequence alignment/map format and samtools. *Bioinformatics*. 2009;25:2078-2079
5. Zhang Y, Liu T, Meyer CA, Eeckhoutte J, Johnson DS, Bernstein BE, Nusbaum C, Myers RM, Brown M, Li W, Liu XS. Model-based analysis of chip-seq (macs). *Genome Biol*. 2008;9:R137
6. Maher B. Encode: The human encyclopaedia. *Nature*. 2012;489:46-48
7. Quinlan AR, Hall IM. Bedtools: A flexible suite of utilities for comparing genomic features. *Bioinformatics*. 2010;26:841-842
8. Yu G, Wang LG, He QY. ChIPseeker: An r/bioconductor package for chip peak annotation, comparison and visualization. *Bioinformatics*. 2015;31:2382-2383
9. Birdsey GM, Dryden NH, Shah AV, Hannah R, Hall MD, Haskard DO, Parsons M, Mason JC, Zvelebil M, Gottgens B, Ridley AJ, Randi AM. The transcription factor erg regulates expression of histone deacetylase 6 and multiple pathways involved in endothelial cell migration and angiogenesis. *Blood*. 2012;119:894-903
10. Wang S, Kollipara RK, Srivastava N, Li R, Ravindranathan P, Hernandez E, Freeman E, Humphries CG, Kapur P, Lotan Y, Fazli L, Gleave ME, Plymate SR, Raj GV, Hsieh JT, Kittler R. Ablation of the oncogenic transcription factor

- erg by deubiquitinase inhibition in prostate cancer. *Proc Natl Acad Sci U S A*. 2014;111:4251-4256
11. Ritchie ME, Phipson B, Wu D, Hu Y, Law CW, Shi W, Smyth GK. Limma powers differential expression analyses for rna-sequencing and microarray studies. *Nucleic Acids Res*. 2015;43:e47
  12. Loven J, Hoke HA, Lin CY, Lau A, Orlando DA, Vakoc CR, Bradner JE, Lee TI, Young RA. Selective inhibition of tumor oncogenes by disruption of super-enhancers. *Cell*. 2013;153:320-334
  13. Whyte WA, Orlando DA, Hnisz D, Abraham BJ, Lin CY, Kagey MH, Rahl PB, Lee TI, Young RA. Master transcription factors and mediator establish super-enhancers at key cell identity genes. *Cell*. 2013;153:307-319
  14. Ramirez F, Ryan DP, Gruning B, Bhardwaj V, Kilpert F, Richter AS, Heyne S, Dundar F, Manke T. Deeptools2: A next generation web server for deep-sequencing data analysis. *Nucleic Acids Res*. 2016;44:W160-165
  15. Coordinators NR. Database resources of the national center for biotechnology information. *Nucleic Acids Res*. 2013;41:D8-D20
  16. FANTOM Consortium. Forrest AR, Kawaji H, Rehli M, *et al*. A promoter-level mammalian expression atlas. *Nature*. 2014;507:462-470
  17. Subramanian A, Tamayo P, Mootha VK, Mukherjee S, Ebert BL, Gillette MA, Paulovich A, Pomeroy SL, Golub TR, Lander ES, Mesirov JP. Gene set enrichment analysis: A knowledge-based approach for interpreting genome-wide expression profiles. *Proc. Natl. Acad. Sci. U. S. A*. 2005;102:15545-15550
  18. Heinz S, Benner C, Spann N, Bertolino E, Lin YC, Laslo P, Cheng JX, Murre C, Singh H, Glass CK. Simple combinations of lineage-determining transcription factors prime cis-regulatory elements required for macrophage and b cell identities. *Mol. Cell*. 2010;38:576-589
  19. McLean CY, Bristol D, Hiller M, Clarke SL, Schaar BT, Lowe CB, Wenger AM, Bejerano G. Great improves functional interpretation of cis-regulatory regions. *Nat. Biotechnol*. 2010;28:495-501
  20. Fabregat A, Sidiropoulos K, Garapati P, Gillespie M, Hausmann K, Haw R, Jassal B, Jupe S, Korninger F, McKay S, Matthews L, May B, Milacic M, Rothfels K, Shamovsky V, Webber M, Weiser J, Williams M, Wu G, Stein L, Hermjakob H, D'Eustachio P. The reactome pathway knowledgebase. *Nucleic Acids Res*. 2016;44:D481-487
  21. Chen L, Qin ZS. Traser: An r package for performing trait-associated snp enrichment analysis in genomic intervals. *Bioinformatics*. 2016;32:1214-1216
  22. Mailman MD, Feolo M, Jin Y, Kimura M, Tryka K, Bagoutdinov R, Hao L, Kiang A, Paschall J, Phan L, Popova N, Pretel S, Ziyabari L, Lee M, Shao Y, Wang ZY, Sirotkin K, Ward M, Kholodov M, Zbicz K, Beck J, Kimelman M, Shevelev S, Preuss D, Yaschenko E, Graeff A, Ostell J, Sherry ST. The ncbi dbgap database of genotypes and phenotypes. *Nat Genet*. 2007;39:1181-1186
  23. MacArthur J, Bowler E, Cerezo M, Gil L, Hall P, Hastings E, Junkins H, McMahon A, Milano A, Morales J, Pendlington ZM, Welter D, Burdett T, Hindorff L, Flicek P, Cunningham F, Parkinson H. The new nhgri-ebi catalog of published genome-wide association studies (gwas catalog). *Nucleic Acids Res*. 2017;45:D896-D901
  24. Genomes Project Consortium, Auton A, Brooks LD, Durbin RM, Garrison EP, Kang HM, Korbel JO, Marchini JL, McCarthy S, McVean GA, Abecasis GR. A global reference for human genetic variation. *Nature*. 2015;526:68-74.

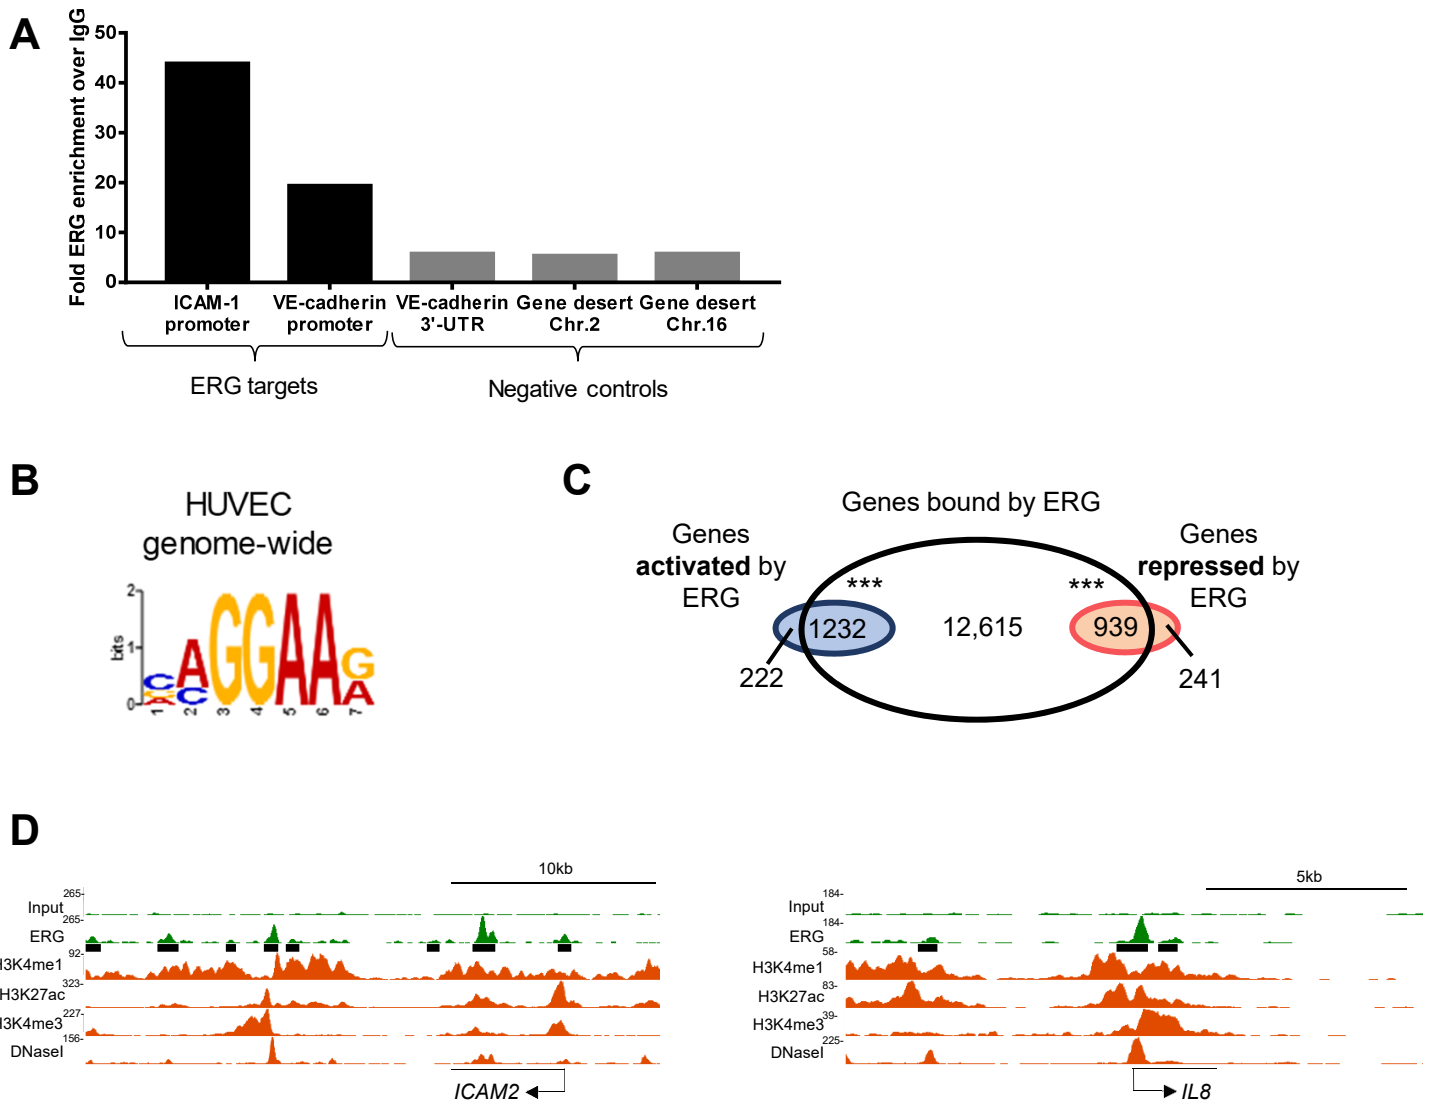

**Online Figure I. Regulation of endothelial gene expression by integrated ERG DNA binding and transcriptome profiling.** (A) ChIP-qPCR validation of ERG binding to the promoter regions of *CDH5* (VE-cadherin) and *ICAM1* (ERG targets) shows ERG enrichment to these sites compared to regions identified in the ChIP-seq which displayed no ERG binding (negative controls). (B) *De novo* motif discovery algorithms define the ERG DNA binding motif in HUVEC. (C) Comparison of global transcriptome profiling of ERG-deficient HUVEC with ERG ChIP-Seq data defines bound ERG transcriptional target genes. ERG activated and repressed genes are significantly more bound than expected by chance, \*\*\* $P < 0.0001$ , Fisher's exact test. (D) ChIP-seq binding profiles for ERG, H3K4me1, H3K4me3, H3K27ac and DNase I hypersensitivity in HUVEC. ERG binding sites are shown as black bars.





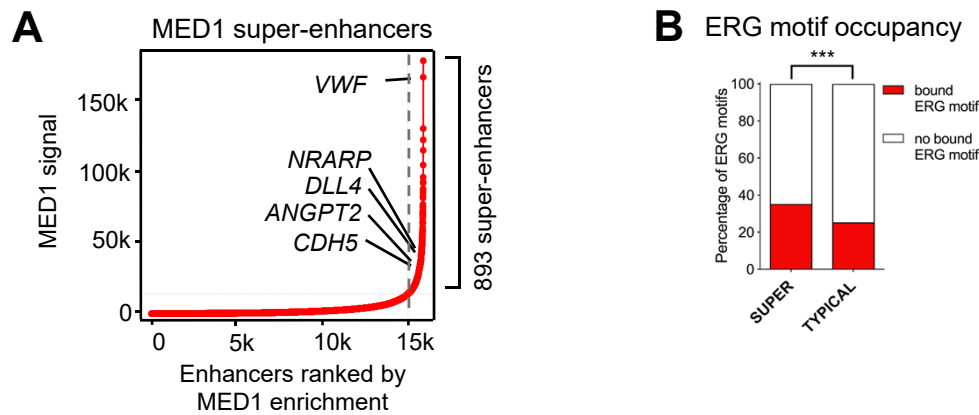

**Online Figure III. SE characterization and MED1 defined SE.** (A) Enhancer regions were defined by H3K4me1 and H3K27ac co-occupancy in HUVEC. Enhancer regions ranked by enrichment of MED1 ChIP-seq signal in rpm/bp. Super-enhancer clusters are shown to the right of the grey dashed line. (B) ERG motif occupancy at SE and typical enhancer regions defined by H3K27ac. The frequency of ERG binding on an identified ERG motif in SE (35%) versus typical enhancers (25%) is illustrated. SE have significantly higher ERG motif occupancy than typical enhancers; \*\*\* $P < 0.0001$ , Pearson's Chi-squared test. To note, typical enhancer had a higher frequency of ERG motifs per kb, however these motifs were less utilised than those in SE.

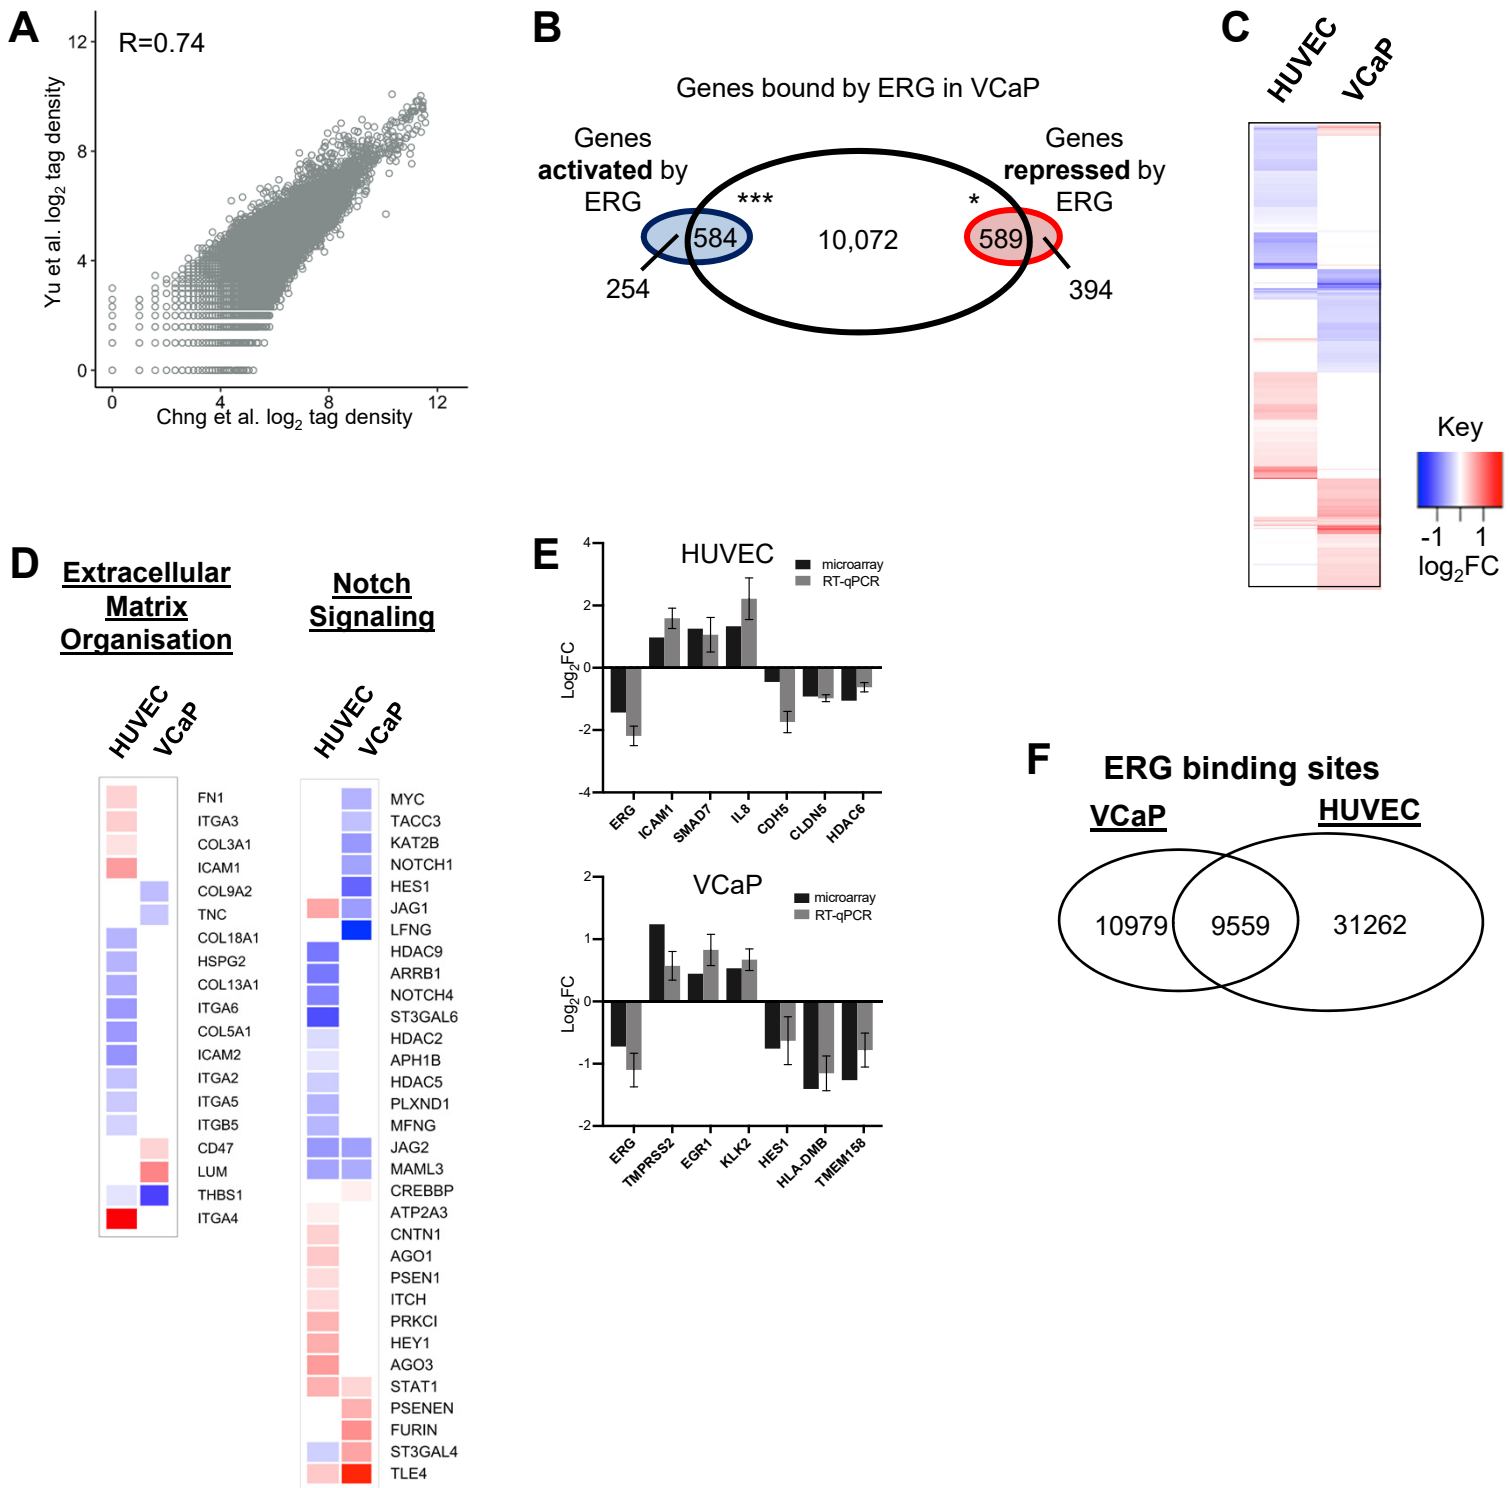

**Online Figure IV. ChIP-seq analysis and transcriptome profiling shows lineage-specific ERG regulation of gene expression.** (A) Correlation of two independent ERG ChIP-seq experiments in VCaP as  $\log_2$  transformed ChIP tag density. Pearson correlation with  $R = 0.74$ ,  $P < 0.0001$ . (B) Comparison of global transcriptome profiling of ERG-deficient VCaP cells with ERG ChIP-seq data defines the expression pattern of genes bound by ERG. ERG activated and repressed genes are significantly more bound than expected by chance.  $*P < 0.05$  and  $***P < 0.0001$ , Fisher's exact test. (C) Heatmap of expression levels of the 3660 bound and regulated putative ERG target genes following ERG inhibition in HUVEC and in VCaP cells. (D) Heatmaps of ERG-bound target gene expression levels in ERG-deficient HUVEC and VCaP cells associated with extracellular matrix organization (left), and Notch signaling (right). (E) Validation of microarray transcriptome profiling by RT-qPCR. Gene expression as  $\log_2$ FC between siCtrl and siERG-treated HUVEC (top) or VCaP (bottom). RT-qPCR values are mean  $\pm$  SEM,  $n = 4$ . (F) Venn diagram shows the overlapping ERG binding sites in HUVEC and VCaP prostate cancer cells.

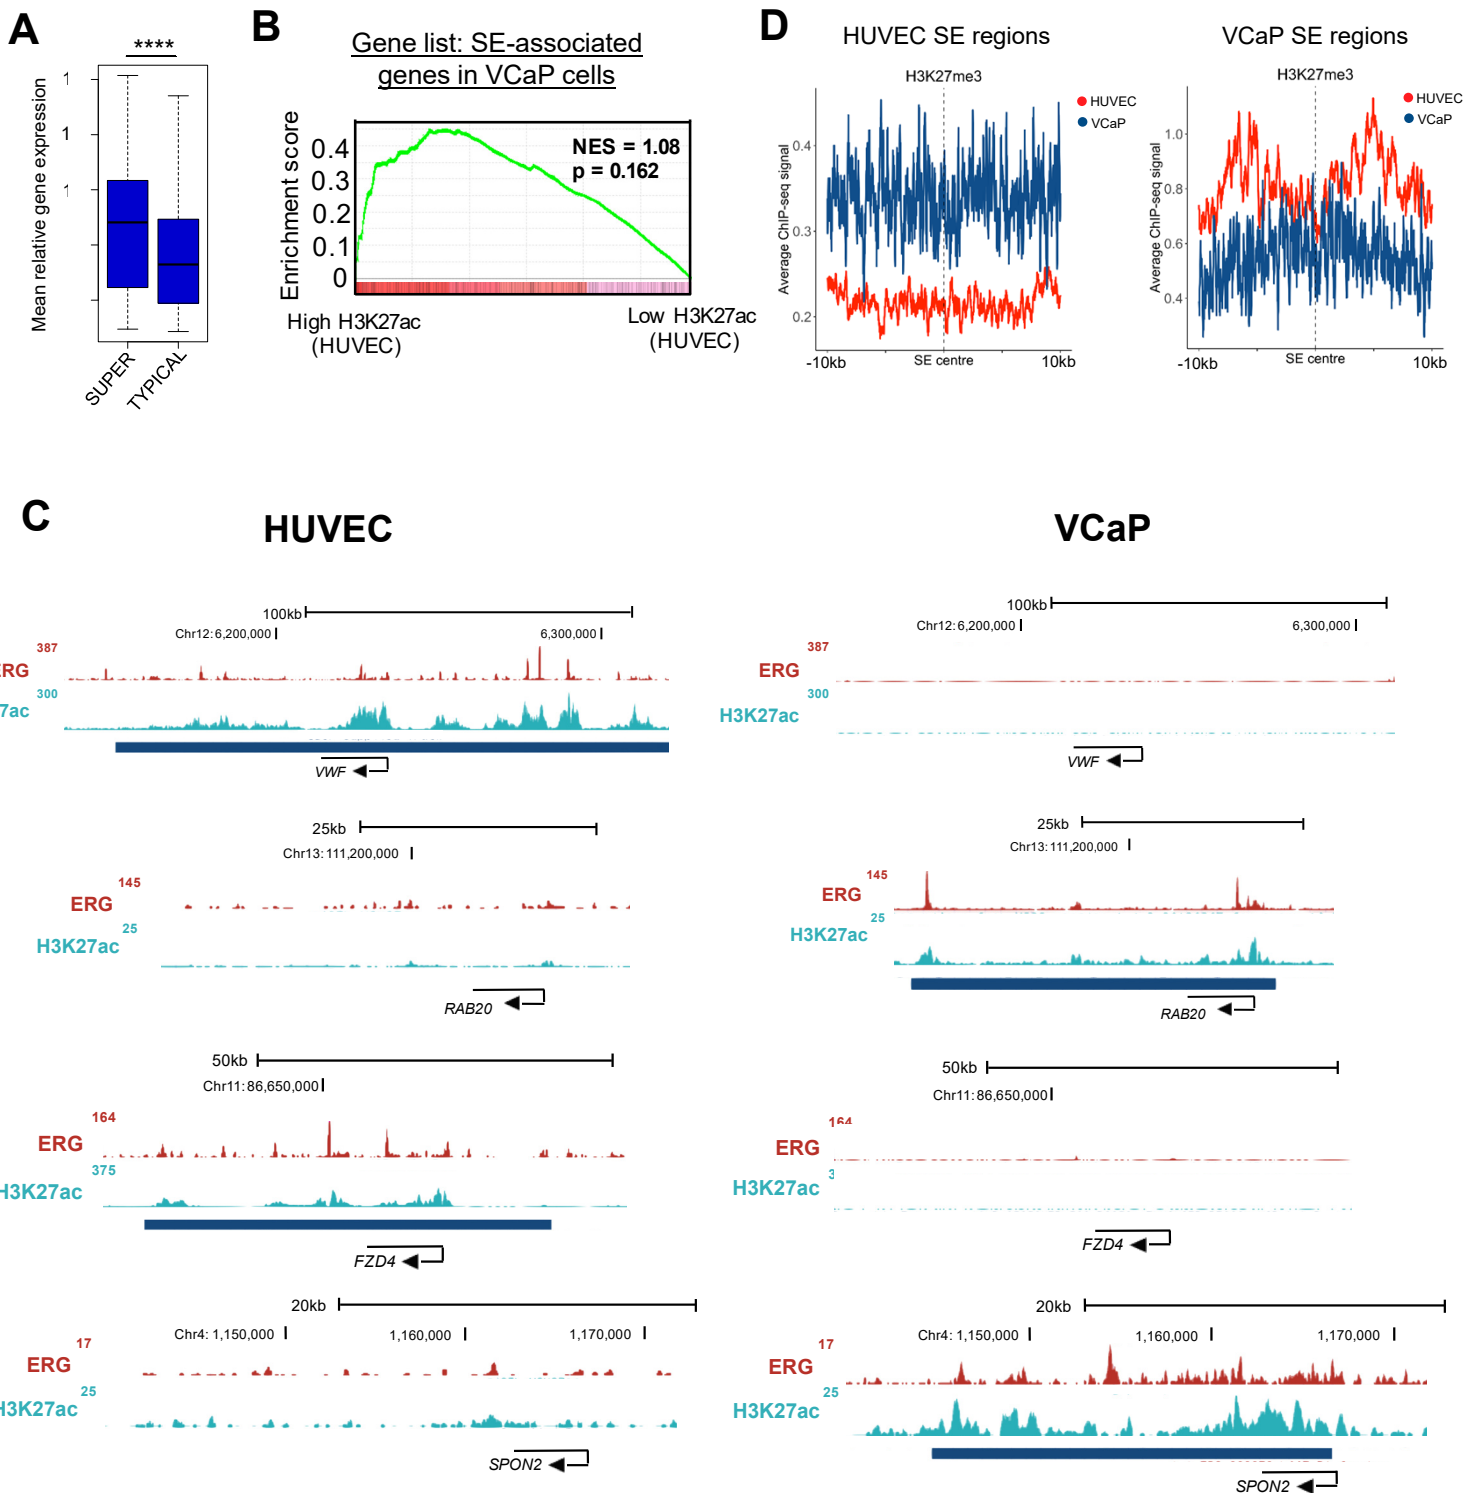

**Online Figure V. Comparison of SE regions in ERG targets identified in HUVEC and VCaP cells. (A)** Average gene expression from transcriptome profiling of VCaP cells shows significantly higher gene expression in SE than in typical enhancers. \*\*\*\* $P < 0.0001$ , Wilcoxon rank-sum test. **(B)** GSEA of the 208 genes associated with H3K27ac-identified SEs in VCaP cells compared with the ranked gene list from 917 H3K27ac-enriched SE in HUVEC. Normalised enrichment score (NES) = 1.08, not significant. **(C)** Gene tracks showing enhancer elements proximal to selected genes bound by ERG in HUVEC and VCaP cells. SE regions indicated as blue bars, alongside ERG binding and H3K27ac enrichment. **(D)** Aggregate plots of repressive histone modification H3K27me3 from HUVEC and VCaP cells in HUVEC SE (left) and VCaP SE (right). Plots are centered on the SE center.

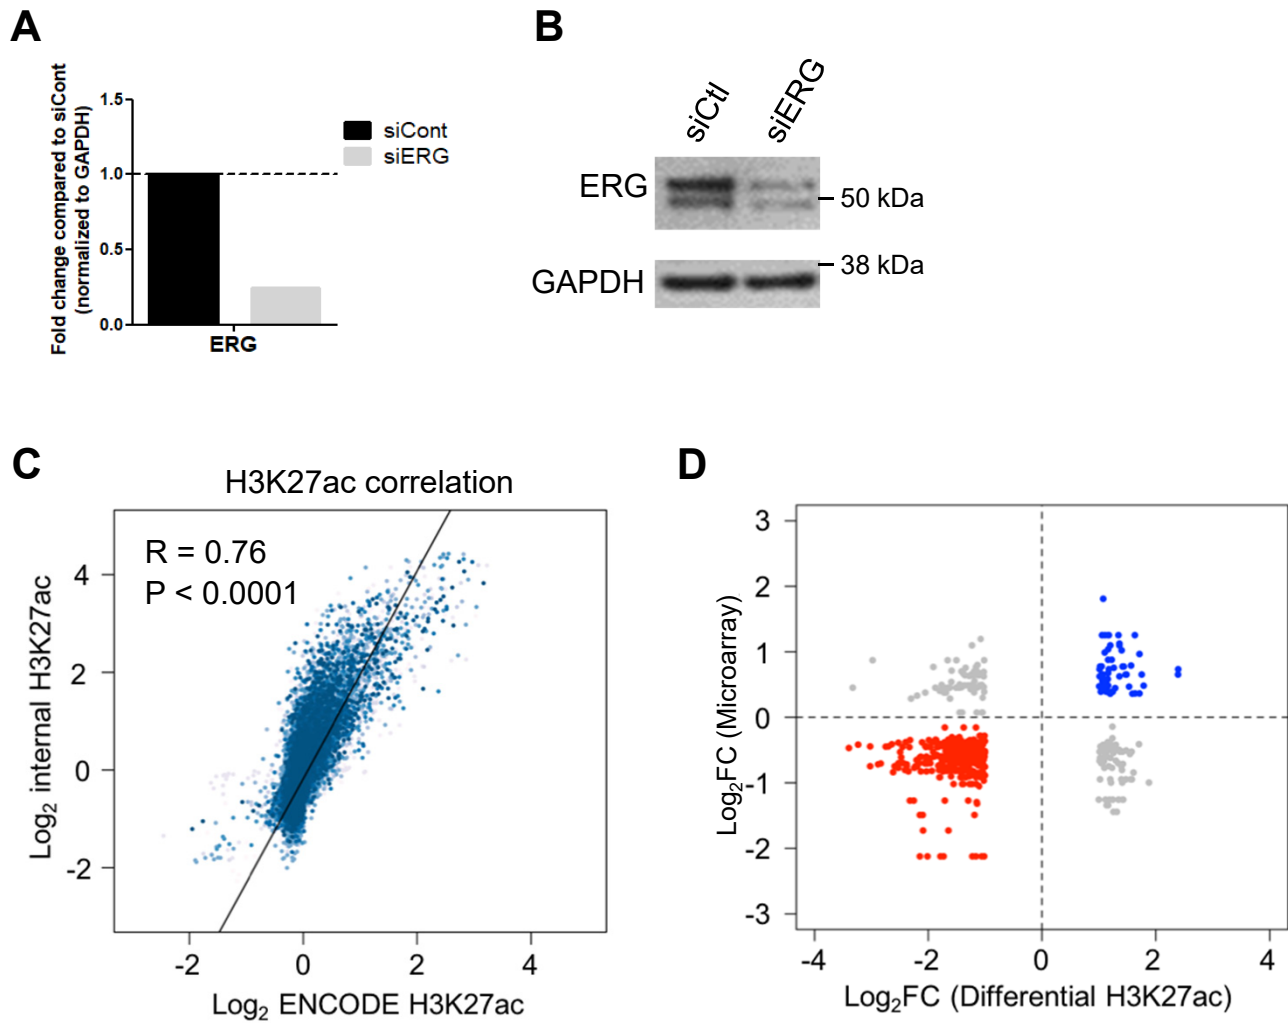

**Online Figure VI. Histone acetylation in ERG-deficient HUVEC.** (A) Validation of siRNA knockdown of ERG in total RNA from samples for H3K27ac ChIP-seq by RT-qPCR in siCtl and siERG treated HUVEC. (B) Validation of siRNA knockdown of ERG in samples for H3K27ac ChIP-seq by immunoblotting in siCtl and siERG-treated HUVEC. (C) Correlation plot comparing  $\text{log}_2$ -normalized H3K27ac enrichment from publicly-available data from ENCODE/Broad Institute to control siRNA-treated HUVEC. Each dot is a region representing a 50bp window. Pearson correlation with line of best fit  $R = 0.76$ ,  $P < 0.0001$ . (D) Scatterplot correlation between differential H3K27ac and differential gene expression. Genes associated with a loss in active region and downregulation in expression are shown in red, and genes associated with a gain in active region and upregulation in expression are in blue.

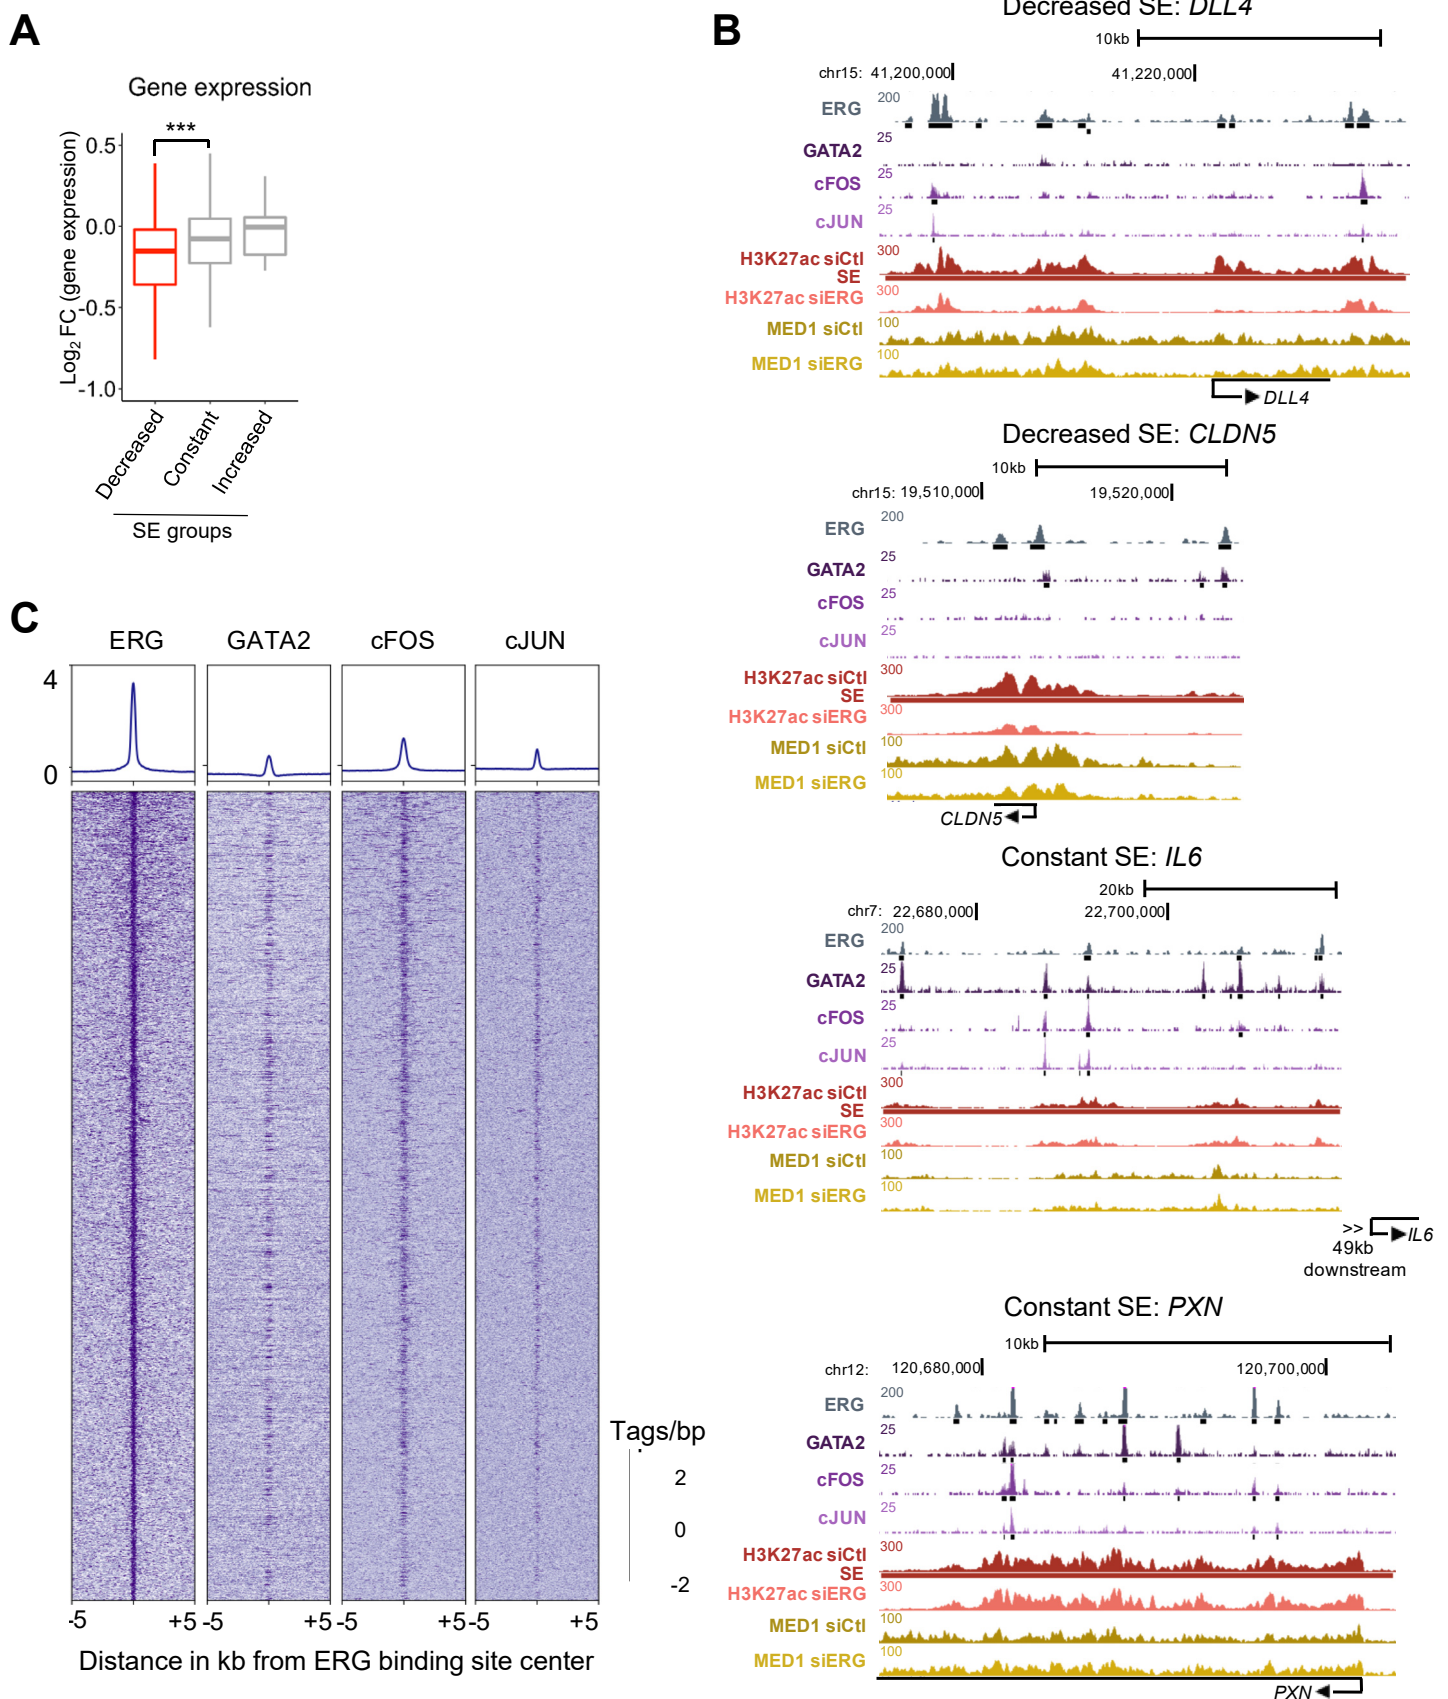

**Online Figure VII. Transcription factor enrichment at ERG-bound sites in HUVEC.** (A) Boxplot illustrating the log<sub>2</sub>FC from gene profiling microarray following ERG knockdown in SE-associated genes identified as decreased, increased or remaining constant from the differential SE analysis defined in B.  $P < 0.0001$ , Kruskal-Wallis test and post-hoc test  $***P < 0.001$ , Wilcoxon rank-sum test. (B) ChIP-seq profiles of SE that decreased following ERG depletion (*DLL4*, *CLDN5*) and SE that remained constant (*IL6*, *PXN*). The H3K27ac and MED1 signal in siCtl or siIERG treated HUVEC is shown with the SE indicated under the H3K27ac siCtl from which it was identified. ERG and cooperative TF's GATA2, cFOS and cJUN binding profiles are represented and binding sites are black bars below each TF profile. (C) Heatmap of ERG ChIP-seq tag density showing co-occupancy of GATA2, cFOS and cJUN transcription factors around  $\pm 5$ kb from ERG peak centers. Rows are ERG-bound loci, repeated for each TF in columns.

**A****Disease-associated SNPs at ERG binding loci**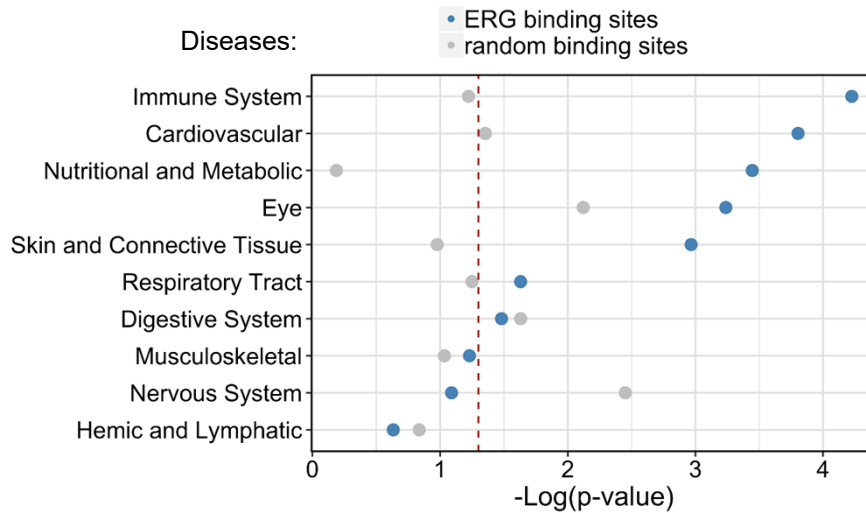**B****Disease-associated SNPs at ERG-bound enhancers**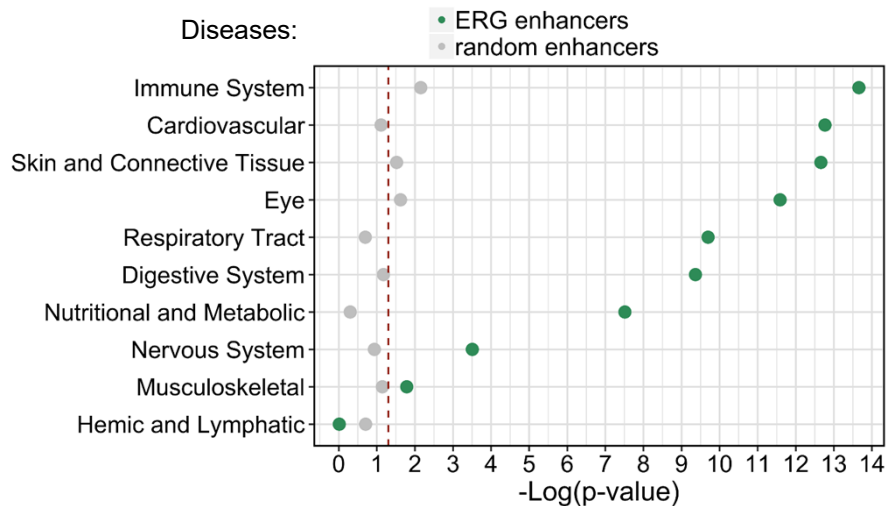

**Online Figure VIII. ERG-dependent regulatory SNPs are associated with diseases of a vascular nature.** Overlap of GWAS SNPs associated with disease trait classes within ERG binding loci (**A**; blue) or ERG-bound enhancers (**B**; green) versus chromosome and size matched random regions (gray). Significance of enrichment was calculated by binomial distribution test with red dashed line indicating  $P = 0.05$ . Both ERG binding sites and ERG-bound enhancers most highly prioritize immune system disease and cardiovascular disease associated SNPs.

|                              | Super-enhancer ranking parameter |       |       |                   |                                 |
|------------------------------|----------------------------------|-------|-------|-------------------|---------------------------------|
|                              | H3K27ac<br>(HUVEC;<br>ENCODE)    | MED1  | ERG   | H3K27ac<br>(VCaP) | H3K27ac<br>(HUVEC;<br>internal) |
| <b>Total super-enhancers</b> | 917                              | 893   | 1125  | 208               | 1015                            |
| <b>Associated genes</b>      | 822                              | 840   | 995   | 199               | 949                             |
| <b>Mean size (bp)</b>        | 35508                            | 45227 | 39708 | 13413             | 42843                           |

**Online Table I. Characteristics of all super-enhancers identified in this study from HUVEC and VCaP cells.**



**Activated in HUVEC and Repressed in VCap (84)**

ABHD2, ABI2, ADAMTS1, ADARB1, ADRB1, AGAP2-AS1, AHNAK, AKAP13, AKAP7, AKT3, APLP2, ARHGAP24, ARHGAP28, ARMC8, ASTN2, ATP1B1, BMPR1B, CAMK2G, CAPZB, CASC4, CRIP2, CSRNP2, CUL4B, CYP2R1, CYTH1, DNAJB6, EFHC1, EFR3B, ELK4, ELL2, ENDOD1, ERCC1, EXT1, FAM107A, FAM49A, FEZ2, FLNB, FRAT1, GNA12, HOPX, HSD17B4, IFT43, IGF1R, IPPK, LIFR, LPP, MAP2K6, MIPEP, MSI2, MYLK, MYO5A, NBEA, NFE2L3, NLGN1, OLMALINC, PCCA, PDLIM5, PHF20L1, PIP4K2A, PKIA, PPP3CA, PTPRM, PXDN, RASSF2, RASSF3, RNF41, RTCA, RUFY3, SLC45A3, SNRK, SPATA2, SRPK2, ST3GAL4, SYNJ2, TM9SF3, TNFAIP8, UBE2E3, XPR1, YIPF1, ZC2HC1A, ZFP36L2, ZMAT3, ZNF671, ZSCAN2

**Repressed in HUVEC and Activated in VCap (24)**

ANXA1, BHLHE40, BTG3, CLN6, ECT2, ENC1, FBXO3, FTH1, GDF11, GOLIM4, IFIH1, IRF7, JAG1, KIF16B, MAP4K5, MFSD6, RAB11FIP1, RBBP8, RGS3, SPOPL, SPRED2, TCP11L1, TXNRD1, ZBTB20

**Activated in HUVEC and VCap (88)**

AGFG2, ANGPTL2, ANO6, APBA2, APP, ARHGAP27, ATL3, BCHE, BTG3, C15orf54, CD58, CENPF, COLGALT1, CSRP1, CTDSPL, DAB2, DCLK1, DHX37, DOCK1, DYM, ELAVL2, EPAS1, ERG, ERICH1, ETV6, FAM172A, FAM198B, FCHSD2, FOCAD, FRMD3, FYN, FZD4, HSD17B11, HSPA4, IGFBP3, IL17D, ITPRIP, KCTD15, KHDRBS3, KIAA0368, KIAA0586, LIG1, LPXN, MAML3, MAN2C1, MAP2K5, MERTK, MRPS6, MTR, NFE2L3, NFIA, NOP14, NRARP, NRCAM, NRP1, OAF, OSBPL10, OSBPL8, PAM, PEX10, PHF19, PRSS23, PSMG4, RALGAPA2, RCC1, RGS12, RGS3, RGS7, RIMKLB, RNF135, RSU1, SAMD13, SH3KBP1, SHISA2, SIPA1L2, SLC22A23, SMYD3, ST6GAL1, SVIL, THBS1, TRNP1, TSHZ1, XPOT, ZDHHC13, ZDHHC23, ZNF618, ZNF638, ZNF704

**Repressed in HUVEC and VCap (53)**

ACAA1, AQP3, ARID5B, AZIN1, BAIAP2L1, BCAS4, BROX, CCDC134, CCDC136, CDC42EP3, CDKN1A, DUSP10, EGR1, FAM117B, GOLGA2, GPX3, HERC5, HIF1AN, HIST1H2AC, HIST1H2BD, HIST1H2BK, HIST1H4H, IP6K2, IRS2, KDM5B, KIF5C, KRAS, LIMS1, NSD1, NXPE3, OCIAD2, PASK, PFKFB4, PPM1K, RCOR2, RDH10, SC5D, SLC38A4, SLC39A6, SPPL2A, STAT1, STK38, TIPARP, TLE4, TMEFF2, TP53BP1, TSPAN8, TTC12, TTPAL, ZBTB8OS, ZCCHC6, ZKSCAN3, ZSCAN31

**Online Table II. Shared ERG bound targets in HUVEC and VCaP cells.**

| <b>Name</b>          | <b>Orientation</b> | <b>Oligonucleotide sequences</b> |
|----------------------|--------------------|----------------------------------|
| ICAM1 promoter       | Forward            | TTGGAAATTCGGGAGCTGAA             |
|                      | Reverse            | TGCTGCAGTTATTTCCGGACT            |
| VE-Cadherin promoter | Forward            | AGCCAGCCCAGCCCTCAC               |
|                      | Reverse            | CCTGTCAGCCGACCGTCTTTG            |
| VE-Cadherin 3'-UTR   | Forward            | GGTAAGGCTGGTGAGGTC               |
|                      | Reverse            | CTTGGAGTGGAGTATGGAGTTG           |
| Gene desert on chr2  | Forward            | TGAATAAGCCAATGAAACAATGACA        |
|                      | Reverse            | TGAAACATAGTATGGGTGGCAACT         |
| Gene desert on chr16 | Forward            | GTCTCTTTCTTGTTTTTAAGCTGGG        |
|                      | Reverse            | TGAGCTCATTGAGACATTTGG            |
| CLDN5 enhancer (E1)  | Forward            | CCGGAAGCCAACCTGGAGTTT            |
|                      | Reverse            | GTGCAGAAGAATGCCCGGAA             |
| DLL4 enhancer (E3)   | Forward            | GTTTCCTGCGGGTTATTTTT             |
|                      | Reverse            | CTTTCAAAGGAGCGGAAT               |
| VWF enhancer         | Forward            | AGGGGATTGGCCTCCTTTTA             |
|                      | Reverse            | CCATTTCTTTTCATTGTTTCC            |
| CLDN5 E2             | Forward            | TCCTGCATCCCTGACCACTG             |
|                      | Reverse            | CTGGATGCTGCTCACATCGT             |
| DLL4 E1              | Forward            | GCAGTTGAGGGTGAATGGT              |
|                      | Reverse            | TGCCCAAGCACCAGAACTTT             |
| DLL4 E2              | Forward            | CCCCAGGACCTATCCCAAGT             |
|                      | Reverse            | CACCATTTAGCAGAGCCGGA             |
| DLL4 E4              | Forward            | CATGTGGGGGACAGGTAGGA             |
|                      | Reverse            | GCTCCCCATCTAGTGCATCA             |
| IL6 E1               | Forward            | TGACTGAGCAAACCCATTTTCC           |
|                      | Reverse            | TCCTTATGTGGGAAGGTATGGC           |
| IL6 E2               | Forward            | AGATTCCTCCACATTTGCCCA            |
|                      | Reverse            | GGCAACTCCAAGCCAGAACA             |
| IL6 E3               | Forward            | GGTCACGCCACAACCTGGAAT            |
|                      | Reverse            | CCATTCCTCACACCCACTGTT            |
| PXN E1               | Forward            | GCCTCTCACCCCTGCTAATC             |
|                      | Reverse            | TTTGTTTCGGGTCTCTGTGGG            |
| PXN E2               | Forward            | GCATCACGTAGCAACAGAGC             |
|                      | Reverse            | GGTGTGCTGACACATTCCG              |
| PXN E3               | Forward            | GGTGGAGTAAAGCGTGAGCA             |
|                      | Reverse            | TGGGTGTAATGCCTGCCTTC             |

**Online Table III. Oligonucleotides used for ChIP-qPCR in this study**

| <b>Name</b>              | <b>Orientation</b> | <b>Oligonucleotide sequences</b>              |
|--------------------------|--------------------|-----------------------------------------------|
| ERG                      | Forward            | GGAGTGGGCGGTGAAAGA                            |
|                          | Reverse            | AAGGATGTCGGCGTTGTAGC                          |
| GAPDH                    | Forward            | CAAGGTCATCCATGACAACCTTG                       |
|                          | Reverse            | GGGCCATCCACAGTCTTCTG                          |
| ICAM1                    | Forward            | CTGAAACTTGCTGCCTATTGGG                        |
|                          | Reverse            | ACACATGTCTATGGAGGGCCA                         |
| SMAD7                    | Forward            | TGGTGTGCTGCAACCCCATCA                         |
|                          | Reverse            | GCACAGCATCTGGACAGTCTGC                        |
| IL8                      | Forward            | AGGAACCATCTCACTGTGTG                          |
|                          | Reverse            | GGCATCTTCACTGATTCTTG                          |
| CDH5                     | Forward            | AGCCAGCCCAGCCCTCAC                            |
|                          | Reverse            | CCTGTCAGCCGACCGTCTTTG                         |
| CLDN5                    | Forward            | GGGAAAGCCCCTGTGCCACC                          |
|                          | Reverse            | TCCAGCCCCGCTCTGAGTCC                          |
| HDAC6                    | Forward            | CTAGCAGACACCTACGACTCAG                        |
|                          | Reverse            | GCAATAGCCATCCATAAGACTGTG                      |
| TMPRSS2                  | Forward            | CGGATGCACCTCGTAGACAG                          |
|                          | Reverse            | TCACCACCAGCTATTGGACC                          |
| EGR1                     | Forward            | CTTCAACCCTCAGGCGGACA                          |
|                          | Reverse            | GGAAAAGCGGCCAGTATAGGT                         |
| KLK2                     | Forward            | GGTGGCTGTGTACAGTCATGGAT                       |
|                          | Reverse            | TGTCTTCAGGCTCAAACAGGTTG                       |
| HES1                     | Forward            | AGAAAGATAGCTCGCGGCATT                         |
|                          | Reverse            | CGGAGGTGCTTCACTGTTCAT                         |
| HLA-DMB                  | Forward            | GCTGGCCACTCTAGTTACTCTC                        |
|                          | Reverse            | GAGGTCCCCCAAGTTGCTAA                          |
| TMEM158                  | Forward            | GGCTGAACCGTAAGCCCATT                          |
|                          | Reverse            | CTCCACACCACGATGACCAG                          |
| VE-Cadherin (Enhancer 1) | Forward            | ACTCGCTAGCGTCGACATCAAGAGGTGGGAGGGATT          |
|                          | Reverse            | ATCGTCGACCGTCGACACCACATGTGCTGTGTTTCGT         |
| VE-Cadherin (Enhancer 2) | Forward            | ACTCGCTAGCGTCGACGAGGGGTAGGGGAGGTGTAT          |
|                          | Reverse            | ATCGTCGACGTCGACCCTCTCTGAGCTTCACTGT            |
| VE-Cadherin (Enhancer 4) | Forward            | ACTCGCTAGCGTCGACTAGGAGACCAGGACAGAGC           |
|                          | Reverse            | ATCGTCGACCGTCGACGACTTGTCTCCATTGTCCAG          |
| VE-Cadherin E4 mutant 1  | Forward            | GGAGAATGCCGCCCTACCAAACCAGCATTCTCTG            |
| VE-Cadherin E4 mutant 2  | Forward            | CCGCCCTACCAAACCAGCATTGGTGACTCTCAACAC          |
| VE-Cadherin E4 mutant 3  | Forward            | GCGAGCTCTGTGTCATACACCAAATGTGTCGAATCCACC       |
| VE-Cadherin E4 mutant 4  | Forward            | TGTCGTCGAATCCACCTGCATGGTTCCCGTGGG             |
| VE-Cadherin E4 mutant 5  | Forward            | TAAAAAGAATGTCTGACCTCAACCAAATCTATGGAGTGAGTCAGG |
| VE-Cadherin E4 mutant 6  | Forward            | AATCTATGGAGTGAGTCAACCAAAGTCCGTAGAAAGTGGG      |
| VE-Cadherin E4 mutant 7  | Forward            | GGGTTTCTAGCAGCACCAAGAACGCCAGGCCT              |
| VE-Cadherin E4 mutant 8  | Forward            | GGCTGGGTCTCCGACCAACCACAAGGGGTC                |
| VE-Cadherin E4 mutant 9  | Forward            | GAGGATGTAATCTGAGGGAACCAAGTCCCTGTTTATCAAGG     |

**Online Table IV. Oligonucleotides used for RT-qPCR and validation of the *CDH5* enhancers**

**Online Table V: Super-enhancers identified by enrichment of H3K27ac in HUVEC.** Ordered by super-enhancer ranking. Chromosome (chr), start and end indicates genomic position on the GRCh37/hg19 assembly. Super-enhancer-associated gene symbols and description are indicated. H3K27ac signal is ChIP-seq read density times length of stitched enhancer. This table spans 21 pages.

| Rank | chr   | start     | end       | Gene         | Gene description                                                                              | H3K27ac signal |
|------|-------|-----------|-----------|--------------|-----------------------------------------------------------------------------------------------|----------------|
| 1    | chr12 | 6150598   | 6345991   | VWF          | von Willebrand factor                                                                         | 398660.3379    |
| 2    | chr15 | 67356712  | 67473258  | SMAD3        | SMAD family member 3                                                                          | 295280.9456    |
| 3    | chr2  | 20761375  | 20819862  | HS1BP3       | HCLS1 binding protein 3                                                                       | 274350.8196    |
| 4    | chr3  | 194817758 | 194946736 | XXYL1-AS2    | XXYL1 antisense RNA 2                                                                         | 262805.5728    |
| 5    | chr1  | 22219550  | 22302670  | HSPG2        | heparan sulfate proteoglycan 2                                                                | 232519.888     |
| 6    | chr3  | 171474760 | 171595496 | TMEM212      | transmembrane protein 212                                                                     | 215380.9504    |
| 7    | chr22 | 36709337  | 36796144  | MYH9         | myosin, heavy chain 9, non-muscle                                                             | 201001.6085    |
| 8    | chr6  | 158422671 | 158493989 | SYNJ2        | synaptojanin 2                                                                                | 199155.515     |
| 9    | chr6  | 151320145 | 151393521 | MTHFD1L      | methylenetetrahydrofolate dehydrogenase (NADP+ dependent) 1-like                              | 196809.1072    |
| 10   | chr12 | 109195156 | 109252637 | SSH1         | slingshot protein phosphatase 1                                                               | 192607.3348    |
| 11   | chr3  | 149242874 | 149379253 | WWTR1-AS1    | WWTR1 antisense RNA 1                                                                         | 188148.4684    |
| 12   | chr4  | 7779369   | 7921553   | AFAP1        | actin filament associated protein 1                                                           | 188038.34      |
| 13   | chr16 | 66390760  | 66423157  | CDH5         | cadherin 5                                                                                    | 185220.1284    |
| 14   | chr20 | 36700423  | 36802692  | TGM2         | transglutaminase 2                                                                            | 183818.3006    |
| 15   | chr1  | 208371601 | 208419074 | PLXNA2       | plexin A2                                                                                     | 177463.5686    |
| 16   | chr8  | 128842258 | 128964124 | PVT1         | Pvt1 oncogene (non-protein coding)                                                            | 172623.189     |
| 17   | chr11 | 33708994  | 33760268  | C11orf91     | chromosome 11 open reading frame 91                                                           | 166455.9136    |
| 18   | chr7  | 100736576 | 100783380 | SERPINE1     | serpin peptidase inhibitor, clade E (nexin, plasminogen activator inhibitor type 1), member 1 | 162625.1784    |
| 19   | chr12 | 96753048  | 96844725  | CDK17        | cyclin-dependent kinase 17                                                                    | 162469.9794    |
| 20   | chr5  | 172279904 | 172339762 | ERGIC1       | endoplasmic reticulum-golgi intermediate compartment 1                                        | 162113.4214    |
| 21   | chr2  | 36579345  | 36731285  | LOC100288911 | uncharacterized LOC100288911                                                                  | 160266.312     |
| 22   | chr1  | 235095440 | 235149137 | SNORA14B     | small nucleolar RNA, H/ACA box 14B                                                            | 157740.3072    |
| 23   | chr7  | 27168902  | 27221257  | HOXA-AS3     | HOXA cluster antisense RNA 3                                                                  | 157499.5465    |
| 24   | chr14 | 74178270  | 74230072  | MIR4505      | microRNA 4505                                                                                 | 157483.2602    |
| 25   | chr9  | 116339406 | 116421278 | RGS3         | regulator of G-protein signaling 3                                                            | 156350.9584    |
| 26   | chr20 | 45931031  | 45991894  | LOC100131496 | uncharacterized LOC100131496                                                                  | 156241.4073    |
| 27   | chr3  | 129294413 | 129347691 | PLXND1       | plexin D1                                                                                     | 151943.5282    |
| 28   | chr19 | 13946293  | 13965188  | LOC284454    | uncharacterized LOC284454                                                                     | 151707.955     |
| 29   | chr8  | 17503830  | 17557739  | MTUS1        | microtubule associated tumor suppressor 1                                                     | 150761.9094    |
| 30   | chr9  | 130587945 | 130645966 | MIR4672      | microRNA 4672                                                                                 | 150721.1517    |
| 31   | chr7  | 130565017 | 130607898 | NA           | NA                                                                                            | 143994.398     |
| 32   | chr15 | 42209440  | 42265576  | EHD4         | EH domain containing 4                                                                        | 143865.3408    |
| 33   | chr12 | 120661895 | 120704645 | PXN          | paxillin                                                                                      | 142866.225     |
| 34   | chr13 | 97873415  | 97962677  | MBNL2        | muscleblind like splicing regulator 2                                                         | 142863.831     |
| 35   | chr11 | 12177950  | 12263570  | MICAL2       | microtubule associated monooxygenase, calponin and LIM domain containing 2                    | 141975.084     |
| 36   | chr15 | 96859967  | 96903973  | MIR1469      | microRNA 1469                                                                                 | 141100.8384    |
| 37   | chr17 | 62604109  | 62746017  | SMURF2       | SMAD specific E3 ubiquitin protein ligase 2                                                   | 140829.4992    |
| 38   | chr12 | 52277472  | 52322378  | ANKRD33      | ankyrin repeat domain 33                                                                      | 140385.1372    |
| 39   | chr6  | 148683214 | 148788098 | SASH1        | SAM and SH3 domain containing 1                                                               | 139254.4868    |

| Rank | chr   | start     | end       | Gene         | Gene description                                                                                     | H3K27ac signal |
|------|-------|-----------|-----------|--------------|------------------------------------------------------------------------------------------------------|----------------|
| 40   | chr10 | 95162521  | 95242935  | MYOF         | myoferlin                                                                                            | 138054.7552    |
| 41   | chr21 | 39806397  | 39879807  | ERG          | v-ets avian erythroblastosis virus E26 oncogene homolog                                              | 133716.315     |
| 42   | chr1  | 94485752  | 94539432  | ABCA4        | ATP binding cassette subfamily A member 4                                                            | 133609.52      |
| 43   | chr3  | 11195553  | 11281478  | HRH1         | histamine receptor H1                                                                                | 127598.625     |
| 44   | chr1  | 156055108 | 156101097 | LMNA         | lamin A/C                                                                                            | 127403.3267    |
| 45   | chr6  | 11585122  | 11619428  | TMEM170B     | transmembrane protein 170B                                                                           | 126873.8798    |
| 46   | chr3  | 57990579  | 58107732  | FLNB         | filamin B                                                                                            | 126513.5247    |
| 47   | chr16 | 81710741  | 81764822  | LOC100129617 | uncharacterized LOC100129617                                                                         | 125786.9979    |
| 48   | chr1  | 39567767  | 39680972  | MACF1        | microtubule-actin crosslinking factor 1                                                              | 125283.9735    |
| 49   | chr6  | 11193176  | 11237658  | NEDD9        | neural precursor cell expressed, developmentally down-regulated 9                                    | 123860.129     |
| 50   | chr17 | 75100867  | 75126400  | SEC14L1      | SEC14 like lipid binding 1                                                                           | 123160.9788    |
| 51   | chr11 | 128547516 | 128601295 | SENCR        | smooth muscle and endothelial cell enriched migration/differentiation-associated long non-coding RNA | 123003.3288    |
| 52   | chr10 | 101663548 | 101770893 | DNMBP-AS1    | DNMBP antisense RNA 1                                                                                | 122265.955     |
| 53   | chr6  | 112522289 | 112576802 | LAMA4        | laminin subunit alpha 4                                                                              | 122130.9252    |
| 54   | chr1  | 85762318  | 85834616  | BCL10        | B-cell CLL/lymphoma 10                                                                               | 120137.5866    |
| 55   | chr17 | 2073163   | 2120642   | SMG6         | SMG6 nonsense mediated mRNA decay factor                                                             | 119447.6682    |
| 56   | chr9  | 127019384 | 127073952 | NEK6         | NIMA related kinase 6                                                                                | 119040.092     |
| 57   | chr12 | 96586107  | 96659334  | ELK3         | ELK3, ETS transcription factor                                                                       | 118408.059     |
| 58   | chr2  | 235859137 | 235915831 | SH3BP4       | SH3-domain binding protein 4                                                                         | 118229.6676    |
| 59   | chr20 | 1301744   | 1326255   | SDCBP2-AS1   | SDCBP2 antisense RNA 1                                                                               | 116843.937     |
| 60   | chr14 | 55087612  | 55159666  | SAMD4A       | sterile alpha motif domain containing 4A                                                             | 115488.1512    |
| 61   | chr19 | 39137654  | 39201612  | ACTN4        | actinin alpha 4                                                                                      | 114753.4436    |
| 62   | chr1  | 23879628  | 23908578  | MDS2         | myelodysplastic syndrome 2 translocation associated                                                  | 114546.465     |
| 63   | chr11 | 65237697  | 65276784  | MALAT1       | metastasis associated lung adenocarcinoma transcript 1 (non-protein coding)                          | 113668.9047    |
| 64   | chr10 | 104354881 | 104418662 | SUFU         | SUFU negative regulator of hedgehog signaling                                                        | 113434.5085    |
| 65   | chr3  | 15670418  | 15691589  | ANKRD28      | ankyrin repeat domain 28                                                                             | 113417.2812    |
| 66   | chr5  | 34654263  | 34720278  | RAI14        | retinoic acid induced 14                                                                             | 113327.9505    |
| 67   | chr1  | 68129344  | 68281895  | GADD45A      | growth arrest and DNA damage inducible alpha                                                         | 112338.5564    |
| 68   | chr12 | 111833864 | 111887883 | SH2B3        | SH2B adaptor protein 3                                                                               | 111932.7699    |
| 69   | chr9  | 38006679  | 38080219  | SHB          | Src homology 2 domain containing adaptor protein B                                                   | 110699.762     |
| 70   | chr15 | 60650645  | 60716895  | ANXA2        | annexin A2                                                                                           | 109531.125     |
| 71   | chr10 | 33501796  | 33577318  | NRP1         | neuropilin 1                                                                                         | 109401.1692    |
| 72   | chr21 | 33774813  | 33873638  | EVA1C        | eva-1 homolog C (C. elegans)                                                                         | 107966.3125    |
| 73   | chr5  | 14141967  | 14238765  | TRIO         | trio Rho guanine nucleotide exchange factor                                                          | 107736.174     |
| 74   | chr2  | 9340401   | 9430319   | ASAP2        | ArfGAP with SH3 domain, ankyrin repeat and PH domain 2                                               | 106714.6824    |
| 75   | chr3  | 5017629   | 5038735   | BHLHE40-AS1  | BHLHE40 antisense RNA 1                                                                              | 106684.4982    |
| 76   | chr10 | 104532541 | 104577425 | WBP1L        | WW domain binding protein 1-like                                                                     | 106137.1948    |
| 77   | chr6  | 3795352   | 3834058   | FAM50B       | family with sequence similarity 50 member B                                                          | 105760.2744    |
| 78   | chr2  | 54772239  | 54842985  | SPTBN1       | spectrin beta, non-erythrocytic 1                                                                    | 105192.2274    |
| 79   | chr12 | 54796490  | 54827997  | ITGA5        | integrin subunit alpha 5                                                                             | 104669.4047    |
| 80   | chr19 | 13260177  | 13284020  | STX10        | syntaxin 10                                                                                          | 104227.2902    |
| 81   | chr3  | 171842338 | 171875238 | FNDC3B       | fibronectin type III domain containing 3B                                                            | 103786.34      |
| 82   | chr8  | 23172880  | 23216185  | LOC100507156 | uncharacterized LOC100507156                                                                         | 103542.255     |
| 83   | chr21 | 46711695  | 46741729  | LOC642852    | uncharacterized LOC642852                                                                            | 102016.4878    |
| 84   | chr13 | 111022722 | 111096837 | COL4A2       | collagen type IV alpha 2                                                                             | 101737.6605    |

| Rank | chr   | start     | end       | Gene         | Gene description                                               | H3K27ac signal |
|------|-------|-----------|-----------|--------------|----------------------------------------------------------------|----------------|
| 85   | chr1  | 16463917  | 16509856  | EPHA2        | EPH receptor A2                                                | 101042.8305    |
| 86   | chr9  | 130278993 | 130343647 | FAM129B      | family with sequence similarity 129 member B                   | 100246.027     |
| 87   | chr3  | 30645151  | 30748081  | TGFBR2       | transforming growth factor beta receptor II                    | 100243.527     |
| 88   | chr2  | 201979149 | 202057923 | CFLAR-AS1    | CFLAR antisense RNA 1                                          | 99523.0716     |
| 89   | chr1  | 172851335 | 172961123 | TNFSF18      | tumor necrosis factor superfamily member 18                    | 99149.5428     |
| 90   | chr1  | 66796708  | 66841160  | PDE4B        | phosphodiesterase 4B                                           | 97483.236      |
| 91   | chr20 | 31049560  | 31090763  | NOL4L        | nucleolar protein 4-like                                       | 97094.8695     |
| 92   | chr1  | 21577891  | 21632742  | LOC100506801 | uncharacterized LOC100506801                                   | 97080.7849     |
| 93   | chr2  | 105984844 | 106027805 | FHL2         | four and a half LIM domains 2                                  | 97053.1951     |
| 94   | chr18 | 3579034   | 3608389   | DLGAP1-AS1   | DLGAP1 antisense RNA 1                                         | 96475.2075     |
| 95   | chr21 | 37793876  | 37861255  | CLDN14       | claudin 14                                                     | 96358.7079     |
| 96   | chr6  | 52353440  | 52443435  | TRAM2-AS1    | TRAM2 antisense RNA 1 (head to head)                           | 96078.662      |
| 97   | chr14 | 75397956  | 75493420  | PGF          | placental growth factor                                        | 95301.7112     |
| 98   | chr10 | 13850061  | 13937676  | FRMD4A       | FERM domain containing 4A                                      | 94992.183      |
| 99   | chr19 | 6055778   | 6069260   | RFX2         | regulatory factor X2                                           | 94421.187      |
| 100  | chr14 | 75075506  | 75089712  | LTBP2        | latent transforming growth factor beta binding protein 2       | 93876.0892     |
| 101  | chr7  | 1552435   | 1579933   | MAFK         | v-maf avian musculoaponeurotic fibrosarcoma oncogene homolog K | 93438.204      |
| 102  | chr8  | 17458742  | 17478982  | PDGFRL       | platelet derived growth factor receptor like                   | 93369.144      |
| 103  | chr9  | 116261612 | 116291620 | RGS3         | regulator of G-protein signaling 3                             | 92919.772      |
| 104  | chr1  | 223885566 | 223965818 | CAPN2        | calpain 2                                                      | 92458.3292     |
| 105  | chr5  | 151038387 | 151079942 | SPARC        | secreted protein acidic and cysteine rich                      | 92376.765      |
| 106  | chr8  | 142126368 | 142175949 | DENND3       | DENN domain containing 3                                       | 92062.0008     |
| 107  | chr9  | 139547268 | 139569757 | MIR126       | microRNA 126                                                   | 91995.7523     |
| 108  | chr16 | 75270190  | 75308198  | BCAR1        | breast cancer anti-estrogen resistance 1                       | 91861.5352     |
| 109  | chr22 | 38596816  | 38638062  | MAFF         | v-maf avian musculoaponeurotic fibrosarcoma oncogene homolog F | 91718.7302     |
| 110  | chr10 | 74055316  | 74098640  | DNAJB12      | DnaJ heat shock protein family (Hsp40) member B12              | 91041.0536     |
| 111  | chr17 | 38467102  | 38507762  | RARA         | retinoic acid receptor alpha                                   | 90805.978      |
| 112  | chr19 | 41803142  | 41835555  | HNRNPUL1     | heterogeneous nuclear ribonucleoprotein U-like 1               | 90526.2677     |
| 113  | chr7  | 22599345  | 22651757  | LOC100506178 | uncharacterized LOC100506178                                   | 90436.906      |
| 114  | chr4  | 41121390  | 41220028  | APBB2        | amyloid beta precursor protein binding family B member 2       | 90352.408      |
| 115  | chr19 | 45925964  | 45982895  | ERCC1        | excision repair cross-complementation group 1                  | 89916.8214     |
| 116  | chr3  | 39186176  | 39223111  | CSRNP1       | cysteine and serine rich nuclear protein 1                     | 89220.186      |
| 117  | chr10 | 17027311  | 17074366  | CUBN         | cubilin                                                        | 87672.876      |
| 118  | chr4  | 141004647 | 141038815 | MAML3        | mastermind like transcriptional coactivator 3                  | 86981.4776     |
| 119  | chr12 | 89737986  | 89786004  | DUSP6        | dual specificity phosphatase 6                                 | 86946.1926     |
| 120  | chr9  | 112777122 | 112836210 | AKAP2        | A-kinase anchoring protein 2                                   | 86764.8192     |
| 121  | chr20 | 49086817  | 49191105  | PTPN1        | protein tyrosine phosphatase, non-receptor type 1              | 86705.0432     |
| 122  | chr2  | 85960385  | 86002659  | ATOX8        | atonal bHLH transcription factor 8                             | 86530.6506     |
| 123  | chr21 | 27256073  | 27360856  | APP          | amyloid beta precursor protein                                 | 86246.8873     |
| 124  | chr20 | 30248993  | 30312218  | BCL2L1       | BCL2 like 1                                                    | 86125.095      |
| 125  | chr7  | 27134521  | 27166245  | HOTAIRM1     | HOXA transcript antisense RNA, myeloid-specific 1              | 86035.488      |
| 126  | chr2  | 28608599  | 28647824  | FOSL2        | FOS like antigen 2                                             | 85569.3375     |
| 127  | chr7  | 107610897 | 107671816 | LAMB1        | laminin subunit beta 1                                         | 85122.1187     |
| 128  | chr12 | 13232121  | 13290136  | GSG1         | germ cell associated 1                                         | 84493.046      |
| 129  | chr9  | 134508244 | 134558764 | RAPGEF1      | Rap guanine nucleotide exchange factor 1                       | 84262.308      |

| Rank | chr   | start     | end       | Gene      | Gene description                                                | H3K27ac signal |
|------|-------|-----------|-----------|-----------|-----------------------------------------------------------------|----------------|
| 130  | chr5  | 77779125  | 77831452  | SCAMP1    | secretory carrier membrane protein 1                            | 83990.0677     |
| 131  | chr19 | 38488345  | 38536099  | SIPA1L3   | signal-induced proliferation-associated 1 like 3                | 83187.468      |
| 132  | chr22 | 23520612  | 23586038  | BCR       | breakpoint cluster region                                       | 83058.307      |
| 133  | chr17 | 32561260  | 32587095  | CCL2      | C-C motif chemokine ligand 2                                    | 82545.4085     |
| 134  | chr1  | 45270550  | 45280207  | BTBD19    | BTB domain containing 19                                        | 82518.0993     |
| 135  | chr17 | 17584029  | 17631609  | RAI1      | retinoic acid induced 1                                         | 82322.916      |
| 136  | chr16 | 86932780  | 86987079  | FOXL1     | forkhead box L1                                                 | 82197.8262     |
| 137  | chr6  | 7953617   | 8007754   | PIP5K1P1  | phosphatidylinositol-4-phosphate 5-kinase, type I, pseudogene 1 | 81519.4946     |
| 138  | chr12 | 105820885 | 105884788 | C12orf75  | chromosome 12 open reading frame 75                             | 81386.8608     |
| 139  | chr10 | 31984188  | 31999298  | ARHGAP12  | Rho GTPase activating protein 12                                | 81380.949      |
| 140  | chr8  | 6384511   | 6460648   | ANGPT2    | angiopoietin 2                                                  | 81299.0886     |
| 141  | chr6  | 11646491  | 11657976  | ADTRP     | androgen dependent TFPI regulating protein                      | 81030.1205     |
| 142  | chr22 | 39566666  | 39581677  | CBX7      | chromobox 7                                                     | 80738.1646     |
| 143  | chr1  | 165851021 | 165881423 | MIR3658   | microRNA 3658                                                   | 80620.0236     |
| 144  | chr16 | 56638226  | 56649793  | MT1A      | metallothionein 1A                                              | 80388.3366     |
| 145  | chr21 | 33886213  | 33898952  | TCP10L    | t-complex 10-like                                               | 80055.6977     |
| 146  | chr14 | 77490511  | 77527029  | IRF2BPL   | interferon regulatory factor 2 binding protein-like             | 79448.5608     |
| 147  | chr18 | 55435265  | 55514768  | ATP8B1    | ATPase phospholipid transporting 8B1                            | 79447.3479     |
| 148  | chr10 | 3109332   | 3148029   | PFKP      | phosphofructokinase, platelet                                   | 79340.4591     |
| 149  | chr10 | 106080794 | 106103813 | ITPRIP    | inositol 1,4,5-trisphosphate receptor interacting protein       | 79185.36       |
| 150  | chr16 | 20908010  | 20924292  | ERI2      | ERI1 exoribonuclease family member 2                            | 78163.3692     |
| 151  | chr13 | 114872138 | 114898518 | RASA3     | RAS p21 protein activator 3                                     | 77346.16       |
| 152  | chr11 | 65183244  | 65201127  | NEAT1     | nuclear paraspeckle assembly transcript 1 (non-protein coding)  | 77263.5015     |
| 153  | chr20 | 48635583  | 48665653  | TRERNA1   | translation regulatory long non-coding RNA 1                    | 76783.745      |
| 154  | chr9  | 67292852  | 67304232  | AQP7P1    | aquaporin 7 pseudogene 1                                        | 76623.816      |
| 155  | chr1  | 234852748 | 234882254 | LINC01132 | long intergenic non-protein coding RNA 1132                     | 76520.8604     |
| 156  | chr12 | 95997866  | 96033544  | PGAM1P5   | phosphoglycerate mutase 1 pseudogene 5                          | 76058.3604     |
| 157  | chr2  | 238580987 | 238654797 | LRRFIP1   | leucine rich repeat (in FLII) interacting protein 1             | 75891.442      |
| 158  | chr22 | 38567054  | 38583949  | PLA2G6    | phospholipase A2 group VI                                       | 75846.7235     |
| 159  | chr12 | 12928214  | 12994430  | DDX47     | DEAD-box helicase 47                                            | 75764.3472     |
| 160  | chr11 | 64618415  | 64647572  | EHD1      | EH domain containing 1                                          | 75761.5488     |
| 161  | chr13 | 28895394  | 28933838  | FLT1      | fms related tyrosine kinase 1                                   | 75753.902      |
| 162  | chr1  | 112929782 | 112950521 | CTTNBP2NL | CTTNBP2 N-terminal like                                         | 75655.872      |
| 163  | chr10 | 123870693 | 123910081 | TACC2     | transforming acidic coiled-coil containing protein 2            | 75266.5292     |
| 164  | chr12 | 124851552 | 124879957 | NCOR2     | nuclear receptor corepressor 2                                  | 74932.39       |
| 165  | chr5  | 139670398 | 139727157 | HBEGF     | heparin binding EGF like growth factor                          | 74921.88       |
| 166  | chr6  | 30707093  | 30723131  | FLOT1     | flotillin 1                                                     | 74839.7232     |
| 167  | chr1  | 234734161 | 234769328 | LINC00184 | long intergenic non-protein coding RNA 184                      | 74838.8927     |
| 168  | chr3  | 50263544  | 50299319  | GNAI2     | G protein subunit alpha i2                                      | 74340.45       |
| 169  | chr1  | 36807484  | 36854230  | STK40     | serine/threonine kinase 40                                      | 74059.6878     |
| 170  | chr1  | 159878907 | 159896233 | TAGLN2    | transgelin 2                                                    | 73895.39       |
| 171  | chr19 | 4367253   | 4404218   | CHAF1A    | chromatin assembly factor 1 subunit A                           | 73885.642      |
| 172  | chr9  | 140188102 | 140217008 | NRARP     | NOTCH-regulated ankyrin repeat protein                          | 73808.5804     |
| 173  | chr3  | 193850430 | 193861638 | HES1      | hes family bHLH transcription factor 1                          | 73264.4544     |
| 174  | chr18 | 3245189   | 3284288   | MYL12B    | myosin light chain 12B                                          | 73009.5627     |

| Rank | chr   | start     | end       | Gene         | Gene description                                             | H3K27ac signal |
|------|-------|-----------|-----------|--------------|--------------------------------------------------------------|----------------|
| 175  | chr11 | 69059906  | 69089967  | MYEOV        | myeloma overexpressed                                        | 72930.9921     |
| 176  | chr10 | 112134837 | 112181444 | SMNDC1       | survival motor neuron domain containing 1                    | 72781.4912     |
| 177  | chr8  | 13208329  | 13242131  | DLC1         | DLC1 Rho GTPase activating protein                           | 72752.0446     |
| 178  | chr12 | 13348076  | 13366140  | EMP1         | epithelial membrane protein 1                                | 72734.696      |
| 179  | chr1  | 38460584  | 38496741  | FHL3         | four and a half LIM domains 3                                | 72661.1072     |
| 180  | chr1  | 19232814  | 19284138  | IFFO2        | intermediate filament family orphan 2                        | 72577.2684     |
| 181  | chr6  | 36787358  | 36797318  | CPNE5        | copine 5                                                     | 72575.532      |
| 182  | chr22 | 31605437  | 31641698  | LIMK2        | LIM domain kinase 2                                          | 72449.478      |
| 183  | chr16 | 81505802  | 81561494  | CMIP         | c-Maf inducing protein                                       | 72433.0152     |
| 184  | chr13 | 110949666 | 111001529 | COL4A1       | collagen type IV alpha 1                                     | 72385.1891     |
| 185  | chr16 | 27245202  | 27272126  | FLJ21408     | uncharacterized LOC400512                                    | 72355.5576     |
| 186  | chr7  | 102510132 | 102534051 | LRRC17       | leucine rich repeat containing 17                            | 72350.1912     |
| 187  | chr10 | 126723028 | 126775223 | MIR4296      | microRNA 4296                                                | 72128.2705     |
| 188  | chr5  | 34570828  | 34629550  | RAI14        | retinoic acid induced 14                                     | 72128.2326     |
| 189  | chr9  | 73020184  | 73055287  | KLF9         | Kruppel-like factor 9                                        | 72048.9075     |
| 190  | chr10 | 14587123  | 14660254  | FAM107B      | family with sequence similarity 107 member B                 | 71829.2682     |
| 191  | chr1  | 156445853 | 156476372 | MEF2D        | myocyte enhancer factor 2D                                   | 71609.7816     |
| 192  | chr16 | 80964376  | 80983359  | CENPN        | centromere protein N                                         | 71526.0457     |
| 193  | chr19 | 2528343   | 2556675   | GADD45B      | growth arrest and DNA damage inducible beta                  | 71487.3024     |
| 194  | chr9  | 139401748 | 139446529 | MIR4673      | microRNA 4673                                                | 71340.6111     |
| 195  | chr8  | 142007360 | 142050583 | PTK2         | protein tyrosine kinase 2                                    | 71084.5458     |
| 196  | chr7  | 39626787  | 39674552  | RALA         | v-ral simian leukemia viral oncogene homolog A (ras related) | 70911.919      |
| 197  | chr10 | 17240970  | 17282024  | TRDMT1       | tRNA aspartic acid methyltransferase 1                       | 70653.934      |
| 198  | chr18 | 33035450  | 33078382  | INO80C       | INO80 complex subunit C                                      | 70532.9828     |
| 199  | chr17 | 6922442   | 6937318   | MIR497HG     | mir-497-195 cluster host gene                                | 70350.0916     |
| 200  | chr3  | 11589842  | 11646558  | VGLL4        | vestigial like family member 4                               | 70293.8104     |
| 201  | chr15 | 39869932  | 39892833  | THBS1        | thrombospondin 1                                             | 70244.2373     |
| 202  | chr20 | 49969845  | 50011168  | MIR3194      | microRNA 3194                                                | 70108.6018     |
| 203  | chr17 | 45299686  | 45394524  | ITGB3        | integrin subunit beta 3                                      | 70094.7658     |
| 204  | chr9  | 676520    | 717070    | KANK1        | KN motif and ankyrin repeat domains 1                        | 69916.31       |
| 205  | chr9  | 130522282 | 130534586 | SH2D3C       | SH2 domain containing 3C                                     | 69758.7584     |
| 206  | chr2  | 161060300 | 161100546 | ITGB6        | integrin subunit beta 6                                      | 69645.703      |
| 207  | chr5  | 172174129 | 172206194 | DUSP1        | dual specificity phosphatase 1                               | 69645.18       |
| 208  | chr6  | 2846238   | 2878706   | MIR4645      | microRNA 4645                                                | 69549.7028     |
| 209  | chr16 | 77598161  | 77631922  | NUDT7        | nudix hydrolase 7                                            | 69547.66       |
| 210  | chr22 | 39624933  | 39689626  | PDGFB        | platelet derived growth factor subunit B                     | 69519.0978     |
| 211  | chr2  | 207985589 | 208032776 | KLF7         | Kruppel-like factor 7 (ubiquitous)                           | 69374.3274     |
| 212  | chr9  | 112667356 | 112686699 | PALM2-AKAP2  | PALM2-AKAP2 readthrough                                      | 69352.3922     |
| 213  | chr3  | 43427720  | 43461413  | SNRK-AS1     | SNRK antisense RNA 1                                         | 68986.4175     |
| 214  | chr11 | 124615820 | 124643202 | VSIG2        | V-set and immunoglobulin domain containing 2                 | 68575.4808     |
| 215  | chr22 | 19860871  | 19882203  | TXNRD2       | thioredoxin reductase 2                                      | 68543.9824     |
| 216  | chr17 | 76369948  | 76393418  | PGS1         | phosphatidylglycerophosphate synthase 1                      | 68335.252      |
| 217  | chr16 | 89364100  | 89403432  | LOC100287036 | uncharacterized LOC100287036                                 | 68229.2204     |
| 218  | chr10 | 129765110 | 129817637 | PTPRE        | protein tyrosine phosphatase, receptor type E                | 68122.2663     |
| 219  | chr1  | 94749745  | 94801650  | ARHGAP29     | Rho GTPase activating protein 29                             | 68073.4075     |



| Rank | chr   | start     | end       | Gene          | Gene description                                                       | H3K27ac signal |
|------|-------|-----------|-----------|---------------|------------------------------------------------------------------------|----------------|
| 220  | chr3  | 43219474  | 43241913  | POMGNT2       | protein O-linked mannose N-acetylglucosaminyltransferase 2 (beta 1,4-) | 67920.6091     |
| 221  | chr20 | 30174985  | 30200259  | MIR3193       | microRNA 3193                                                          | 67842.9982     |
| 222  | chr6  | 33736176  | 33758026  | LEMD2         | LEM domain containing 2                                                | 67667.265      |
| 223  | chr1  | 150530393 | 150553301 | MCL1          | myeloid cell leukemia 1                                                | 67500.7128     |
| 224  | chr16 | 16076415  | 16124453  | ABCC1         | ATP binding cassette subfamily C member 1                              | 67373.295      |
| 225  | chr16 | 82659979  | 82692499  | CDH13         | cadherin 13                                                            | 67092.012      |
| 226  | chr17 | 1964953   | 1995350   | SMG6          | SMG6 nonsense mediated mRNA decay factor                               | 67019.3056     |
| 227  | chr15 | 39520384  | 39595133  | C15orf54      | chromosome 15 open reading frame 54                                    | 66840.5558     |
| 228  | chr22 | 47129753  | 47155769  | CERK          | ceramide kinase                                                        | 66489.0912     |
| 229  | chr11 | 9707628   | 9750951   | SWAP70        | SWAP switching B-cell complex 70kDa subunit                            | 66392.4975     |
| 230  | chr12 | 125135279 | 125181009 | NCOR2         | nuclear receptor corepressor 2                                         | 66308.5        |
| 231  | chr8  | 103799507 | 103824070 | AZIN1         | antizyme inhibitor 1                                                   | 65909.8979     |
| 232  | chr8  | 8989929   | 9009398   | PPP1R3B       | protein phosphatase 1 regulatory subunit 3B                            | 65776.0165     |
| 233  | chr12 | 50037880  | 50069731  | FMNL3         | formin like 3                                                          | 65714.9832     |
| 234  | chr6  | 129943794 | 130032337 | ARHGAP18      | Rho GTPase activating protein 18                                       | 65698.906      |
| 235  | chr10 | 112247002 | 112290867 | DUSP5         | dual specificity phosphatase 5                                         | 65670.2915     |
| 236  | chr8  | 8923227   | 8947797   | MIR4660       | microRNA 4660                                                          | 65651.04       |
| 237  | chr17 | 57829891  | 57875903  | MIR21         | microRNA 21                                                            | 65599.3084     |
| 238  | chr10 | 80872033  | 80921265  | ZMIZ1         | zinc finger MIZ-type containing 1                                      | 65572.1008     |
| 239  | chr12 | 125397715 | 125426199 | MIR5188       | microRNA 5188                                                          | 65541.684      |
| 240  | chr1  | 101700210 | 101731414 | S1PR1         | sphingosine-1-phosphate receptor 1                                     | 65475.3532     |
| 241  | chr1  | 100103112 | 100159722 | PALMD         | palmdelphin                                                            | 65316.618      |
| 242  | chr12 | 25041524  | 25103335  | BCAT1         | branched chain amino acid transaminase 1                               | 65117.8885     |
| 243  | chr17 | 40669226  | 40684512  | ATP6V0A1      | ATPase H+ transporting V0 subunit a1                                   | 65051.1016     |
| 244  | chr22 | 22290513  | 22308177  | PPM1F         | protein phosphatase, Mg2+/Mn2+ dependent 1F                            | 64991.1552     |
| 245  | chr20 | 23029205  | 23088549  | CD93          | CD93 molecule                                                          | 64684.96       |
| 246  | chr1  | 86032463  | 86052272  | DDAH1         | dimethylarginine dimethylaminohydrolase 1                              | 64652.6142     |
| 247  | chr5  | 75979048  | 76018544  | NCRUPAR       | non-protein coding RNA, upstream of F2R/PAR1                           | 64548.3128     |
| 248  | chr4  | 86681232  | 86766007  | ARHGAP24      | Rho GTPase activating protein 24                                       | 64352.7025     |
| 249  | chr5  | 95897241  | 95951367  | CAST          | calpastatin                                                            | 64215.0864     |
| 250  | chr2  | 36762322  | 36800715  | FEZ2          | fasciculation and elongation protein zeta 2                            | 64208.4532     |
| 251  | chr11 | 65653947  | 65671575  | CCDC85B       | coiled-coil domain containing 85B                                      | 64076.0172     |
| 252  | chr11 | 86166775  | 86197958  | CCDC81        | coiled-coil domain containing 81                                       | 64056.1186     |
| 253  | chr15 | 39393712  | 39435307  | C15orf54      | chromosome 15 open reading frame 54                                    | 63860.8035     |
| 254  | chr17 | 73840861  | 73875143  | WBP2          | WW domain binding protein 2                                            | 63829.6558     |
| 255  | chr7  | 75920179  | 76023287  | SSC4D         | scavenger receptor cysteine rich family, 4 domains                     | 63782.6088     |
| 256  | chr11 | 86258599  | 86345784  | ME3           | malic enzyme 3, NADP(+)-dependent, mitochondrial                       | 63505.554      |
| 257  | chr16 | 24986883  | 25007567  | ARHGAP17      | Rho GTPase activating protein 17                                       | 63386.118      |
| 258  | chr10 | 13715819  | 13759358  | PRPF18        | pre-mRNA processing factor 18                                          | 63231.6897     |
| 259  | chr22 | 50549071  | 50559979  | MOV10L1       | Mov10 RISC complex RNA helicase like 1                                 | 63210.7692     |
| 260  | chr2  | 159974227 | 160026948 | TANC1         | tetratricopeptide repeat, ankyrin repeat and coiled-coil containing 1  | 63175.5743     |
| 261  | chr10 | 3815685   | 3830096   | KLF6          | Kruppel-like factor 6                                                  | 63072.6237     |
| 262  | chr15 | 95827713  | 95849368  | LINC01197     | long intergenic non-protein coding RNA 1197                            | 62459.5165     |
| 263  | chr12 | 66216228  | 66289670  | RPSAP52       | ribosomal protein SA pseudogene 52                                     | 62440.3884     |
| 264  | chr20 | 1350206   | 1382567   | FKBP1A-SDCBP2 | FKBP1A-SDCBP2 readthrough (NMD candidate)                              | 62294.925      |

| Rank | chr   | start     | end       | Gene        | Gene description                                                           | H3K27ac signal |
|------|-------|-----------|-----------|-------------|----------------------------------------------------------------------------|----------------|
| 265  | chr2  | 109251897 | 109296727 | LIMS1       | LIM zinc finger domain containing 1                                        | 62210.591      |
| 266  | chr9  | 134581825 | 134615685 | RAPGEF1     | Rap guanine nucleotide exchange factor 1                                   | 62177.118      |
| 267  | chr1  | 36598548  | 36654745  | TRAPPC3     | trafficking protein particle complex 3                                     | 62137.0229     |
| 268  | chr11 | 118478263 | 118494747 | PHLDB1      | pleckstrin homology like domain family B member 1                          | 62106.7668     |
| 269  | chr15 | 63171185  | 63191564  | MIR190A     | microRNA 190a                                                              | 62047.9413     |
| 270  | chr15 | 66992522  | 67068022  | SMAD6       | SMAD family member 6                                                       | 62015.7        |
| 271  | chr1  | 94126759  | 94168135  | BCAR3       | breast cancer anti-estrogen resistance 3                                   | 61935.7344     |
| 272  | chr2  | 56211127  | 56246415  | MIR216B     | microRNA 216b                                                              | 61863.3928     |
| 273  | chr8  | 23384979  | 23420264  | SLC25A37    | solute carrier family 25 member 37                                         | 61769.921      |
| 274  | chr2  | 46523336  | 46595382  | EPAS1       | endothelial PAS domain protein 1                                           | 61714.6036     |
| 275  | chr21 | 46781936  | 46789530  | COL18A1     | collagen type XVIII alpha 1                                                | 61443.054      |
| 276  | chr11 | 12100713  | 12113876  | MICAL2      | microtubule associated monooxygenase, calponin and LIM domain containing 2 | 61168.461      |
| 277  | chr22 | 25347837  | 25425402  | KIAA1671    | KIAA1671                                                                   | 61167.759      |
| 278  | chr8  | 38852016  | 38901539  | TM2D2       | TM2 domain containing 2                                                    | 61101.4774     |
| 279  | chr3  | 185394602 | 185465225 | IGF2BP2-AS1 | IGF2BP2 antisense RNA 1                                                    | 61095.9573     |
| 280  | chr5  | 76077074  | 76135449  | F2RL1       | F2R like trypsin receptor 1                                                | 61042.7375     |
| 281  | chr14 | 73108164  | 73147405  | DPF3        | double PHD fingers 3                                                       | 60682.2824     |
| 282  | chr7  | 115953501 | 116019012 | CAV1        | caveolin 1                                                                 | 60440.4486     |
| 283  | chr14 | 69401382  | 69449544  | ACTN1-AS1   | ACTN1 antisense RNA 1                                                      | 60289.1916     |
| 284  | chr16 | 86694268  | 86716690  | FOXL1       | forkhead box L1                                                            | 59947.4592     |
| 285  | chr14 | 100196359 | 100226465 | EML1        | echinoderm microtubule associated protein like 1                           | 59805.569      |
| 286  | chr13 | 99127033  | 99163851  | STK24       | serine/threonine kinase 24                                                 | 59774.023      |
| 287  | chr8  | 13100908  | 13135549  | DLC1        | DLC1 Rho GTPase activating protein                                         | 59662.1943     |
| 288  | chr3  | 50192378  | 50210933  | SEMA3F      | semaphorin 3F                                                              | 59554.128      |
| 289  | chr17 | 74365017  | 74383419  | SPHK1       | sphingosine kinase 1                                                       | 59480.7846     |
| 290  | chr11 | 114150710 | 114180316 | NNMT        | nicotinamide N-methyltransferase                                           | 59214.9606     |
| 291  | chr7  | 43675602  | 43715196  | STK17A      | serine/threonine kinase 17a                                                | 59208.8676     |
| 292  | chr16 | 53535789  | 53555066  | AKTIP       | AKT interacting protein                                                    | 59084.005      |
| 293  | chr22 | 44415533  | 44456138  | PARVB       | parvin beta                                                                | 59080.275      |
| 294  | chr15 | 89163947  | 89194984  | ISG20       | interferon stimulated exonuclease gene 20kDa                               | 59038.5814     |
| 295  | chr12 | 48193067  | 48216827  | HDAC7       | histone deacetylase 7                                                      | 58967.568      |
| 296  | chr2  | 46272094  | 46326612  | EPAS1       | endothelial PAS domain protein 1                                           | 58955.7652     |
| 297  | chr11 | 128361680 | 128394507 | ETS1        | ETS proto-oncogene 1, transcription factor                                 | 58885.0726     |
| 298  | chr4  | 57929006  | 57986466  | IGFBP7-AS1  | IGFBP7 antisense RNA 1                                                     | 58603.454      |
| 299  | chr18 | 3445975   | 3479417   | TGIF1       | TGFB induced factor homeobox 1                                             | 58583.6956     |
| 300  | chr6  | 132380260 | 132409920 | LINC01013   | long intergenic non-protein coding RNA 1013                                | 58542.908      |
| 301  | chr9  | 114764125 | 114847374 | MIR4668     | microRNA 4668                                                              | 58532.3719     |
| 302  | chr6  | 151176897 | 151217964 | MTHFD1L     | methylenetetrahydrofolate dehydrogenase (NADP+ dependent) 1-like           | 58499.9415     |
| 303  | chr19 | 45088988  | 45130994  | IGSF23      | immunoglobulin superfamily member 23                                       | 58253.9208     |
| 304  | chr11 | 124745532 | 124791853 | ROBO4       | roundabout guidance receptor 4                                             | 58012.4204     |
| 305  | chr3  | 42054220  | 42116156  | TRAK1       | trafficking protein, kinesin binding 1                                     | 57972.096      |
| 306  | chr1  | 9456681   | 9475075   | SPSB1       | splA/ryanodine receptor domain and SOCS box containing 1                   | 57841.7724     |
| 307  | chr5  | 138836915 | 138876666 | TMEM173     | transmembrane protein 173                                                  | 57479.946      |
| 308  | chr9  | 6550326   | 6568985   | UHRF2       | ubiquitin like with PHD and ring finger domains 2                          | 57342.8388     |
| 309  | chr12 | 46822728  | 46889054  | SLC38A2     | solute carrier family 38 member 2                                          | 57080.1556     |

| Rank | chr   | start     | end       | Gene         | Gene description                                        | H3K27ac signal |
|------|-------|-----------|-----------|--------------|---------------------------------------------------------|----------------|
| 310  | chr6  | 12566975  | 12609976  | PHACTR1      | phosphatase and actin regulator 1                       | 57015.0259     |
| 311  | chr1  | 156861922 | 156878393 | PEAR1        | platelet endothelial aggregation receptor 1             | 57004.4839     |
| 312  | chr12 | 11945824  | 11994797  | ETV6         | ETS variant 6                                           | 56598.0961     |
| 313  | chr1  | 59218437  | 59252850  | LINC01135    | long intergenic non-protein coding RNA 1135             | 56347.8462     |
| 314  | chr8  | 124472826 | 124503350 | FBXO32       | F-box protein 32                                        | 56332.042      |
| 315  | chr19 | 11184244  | 11208642  | LDLR         | low density lipoprotein receptor                        | 56203.2328     |
| 316  | chr14 | 85981997  | 86004008  | FLRT2        | fibronectin leucine rich transmembrane protein 2        | 56172.072      |
| 317  | chr6  | 166988327 | 167054753 | RPS6KA2      | ribosomal protein S6 kinase A2                          | 56023.6884     |
| 318  | chr1  | 32027644  | 32063653  | TINAGL1      | tubulointerstitial nephritis antigen like 1             | 55993.995      |
| 319  | chr7  | 116138951 | 116195548 | CAV1         | caveolin 1                                              | 55940.4748     |
| 320  | chr6  | 121824182 | 121846032 | GJA1         | gap junction protein alpha 1                            | 55911.965      |
| 321  | chr11 | 114028798 | 114052764 | NNMT         | nicotinamide N-methyltransferase                        | 55718.5534     |
| 322  | chr10 | 82252859  | 82272649  | SH2D4B       | SH2 domain containing 4B                                | 55635.627      |
| 323  | chr17 | 38169818  | 38196043  | SNORD124     | small nucleolar RNA, C/D box 124                        | 55518.325      |
| 324  | chr6  | 37204060  | 37228201  | TMEM217      | transmembrane protein 217                               | 55495.3308     |
| 325  | chr8  | 42036063  | 42074167  | PLAT         | plasminogen activator, tissue type                      | 55387.9744     |
| 326  | chr6  | 142692082 | 142738972 | ADGRG6       | adhesion G protein-coupled receptor G6                  | 55372.401      |
| 327  | chr8  | 8141652   | 8173485   | FAM86B3P     | family with sequence similarity 86, member A pseudogene | 55360.7703     |
| 328  | chrX  | 64886529  | 64944161  | MSN          | moesin                                                  | 55217.2192     |
| 329  | chr7  | 154996107 | 155005952 | INSIG1       | insulin induced gene 1                                  | 54993.1855     |
| 330  | chr9  | 133707819 | 133739533 | ABL1         | ABL proto-oncogene 1, non-receptor tyrosine kinase      | 54985.7332     |
| 331  | chr3  | 159478762 | 159516479 | IQCJ-SCHIP1  | IQCJ-SCHIP1 readthrough                                 | 54900.8652     |
| 332  | chr17 | 73670335  | 73704724  | SAP30BP      | SAP30 binding protein                                   | 54884.844      |
| 333  | chr3  | 14472158  | 14531301  | GRIP2        | glutamate receptor interacting protein 2                | 54878.7897     |
| 334  | chr16 | 29271765  | 29284462  | SNX29P2      | sorting nexin 29 pseudogene 2                           | 54842.1521     |
| 335  | chr10 | 129704859 | 129748683 | PTPRE        | protein tyrosine phosphatase, receptor type E           | 54709.8816     |
| 336  | chr3  | 16091523  | 16128598  | GALNT15      | polypeptide N-acetylgalactosaminyltransferase 15        | 54685.625      |
| 337  | chr17 | 7743298   | 7749282   | KDM6B        | lysine demethylase 6B                                   | 54301.808      |
| 338  | chr7  | 22670184  | 22717894  | IL6          | interleukin 6                                           | 54241.499      |
| 339  | chr17 | 8041292   | 8062386   | PER1         | period circadian clock 1                                | 54241.1116     |
| 340  | chr14 | 61763760  | 61834459  | PRKCH        | protein kinase C eta                                    | 54105.9447     |
| 341  | chr20 | 30131771  | 30162419  | MCTS2P       | malignant T-cell amplified sequence 2, pseudogene       | 54047.748      |
| 342  | chr10 | 21602547  | 21662898  | MIR1915      | microRNA 1915                                           | 54032.2503     |
| 343  | chr20 | 48752880  | 48789894  | TMEM189      | transmembrane protein 189                               | 54014.5302     |
| 344  | chr12 | 124982325 | 125009826 | NCOR2        | nuclear receptor corepressor 2                          | 53943.2115     |
| 345  | chr10 | 3918513   | 3940336   | KLF6         | Kruppel-like factor 6                                   | 53826.4295     |
| 346  | chr11 | 86625033  | 86681653  | LOC100506368 | uncharacterized LOC100506368                            | 53602.154      |
| 347  | chr7  | 22456641  | 22486999  | STEAP1B      | STEAP family member 1B                                  | 53466.5096     |
| 348  | chr1  | 17214518  | 17233340  | CROCC        | ciliary rootlet coiled-coil, rootletin                  | 53379.192      |
| 349  | chr9  | 139536090 | 139545666 | EGFL7        | EGF like domain multiple 7                              | 53290.44       |
| 350  | chr8  | 10632651  | 10683624  | MIR1322      | microRNA 1322                                           | 53001.7254     |
| 351  | chr12 | 70989165  | 71066393  | PTPRB        | protein tyrosine phosphatase, receptor type B           | 52978.408      |
| 352  | chr13 | 21606726  | 21655987  | LATS2        | large tumor suppressor kinase 2                         | 52847.2008     |
| 353  | chr2  | 216692935 | 216717695 | LINC00607    | long intergenic non-protein coding RNA 607              | 52681.852      |
| 354  | chr9  | 35744305  | 35762735  | GBA2         | glucosidase, beta (bile acid) 2                         | 52637.923      |

| Rank | chr   | start     | end       | Gene         | Gene description                                                            | H3K27ac signal |
|------|-------|-----------|-----------|--------------|-----------------------------------------------------------------------------|----------------|
| 355  | chr3  | 10230316  | 10249580  | IRAK2        | interleukin 1 receptor associated kinase 2                                  | 52588.7936     |
| 356  | chr6  | 7877002   | 7916727   | TXNDC5       | thioredoxin domain containing 5 (endoplasmic reticulum)                     | 52587.955      |
| 357  | chr2  | 47258607  | 47272398  | TTC7A        | tetratricopeptide repeat domain 7A                                          | 52569.9129     |
| 358  | chr3  | 170027858 | 170084730 | SKIL         | SKI-like proto-oncogene                                                     | 52538.3536     |
| 359  | chr4  | 77921623  | 77945294  | Sep-11       | septin 11                                                                   | 52471.5057     |
| 360  | chr14 | 23004002  | 23059643  | DAD1         | defender against cell death 1                                               | 52213.5144     |
| 361  | chr5  | 71736476  | 71820549  | ZNF366       | zinc finger protein 366                                                     | 52167.2965     |
| 362  | chr17 | 57904840  | 57934505  | MIR21        | microRNA 21                                                                 | 52020.544      |
| 363  | chr1  | 65326422  | 65366272  | JAK1         | Janus kinase 1                                                              | 51904.625      |
| 364  | chr10 | 124060043 | 124072216 | BTBD16       | BTB domain containing 16                                                    | 51881.326      |
| 365  | chr11 | 47414747  | 47449338  | PSMC3        | proteasome 26S subunit, ATPase 3                                            | 51806.9407     |
| 366  | chr3  | 134079996 | 134094933 | AMOTL2       | angiomin like 2                                                             | 51768.6546     |
| 367  | chr10 | 8081461   | 8109662   | GATA3        | GATA binding protein 3                                                      | 51692.433      |
| 368  | chr17 | 25658699  | 25713076  | TBC1D3P5     | TBC1 domain family member 3 pseudogene 5                                    | 51473.2682     |
| 369  | chr10 | 14025589  | 14053301  | FRMD4A       | FERM domain containing 4A                                                   | 51458.4128     |
| 370  | chr5  | 72110560  | 72169936  | TNPO1        | transportin 1                                                               | 51348.3648     |
| 371  | chr7  | 2662714   | 2685753   | TTYH3        | tweety family member 3                                                      | 51284.814      |
| 372  | chr7  | 107918917 | 107954929 | NRCAM        | neuronal cell adhesion molecule                                             | 51245.076      |
| 373  | chr5  | 110885681 | 110901351 | STARD4       | StAR related lipid transfer domain containing 4                             | 51137.478      |
| 374  | chr1  | 12192344  | 12247089  | TNFRSF1B     | tumor necrosis factor receptor superfamily member 1B                        | 51077.085      |
| 375  | chr2  | 201625536 | 201655055 | BZW1         | basic leucine zipper and W2 domains 1                                       | 51070.8219     |
| 376  | chr1  | 153569257 | 153586333 | S100A16      | S100 calcium binding protein A16                                            | 50906.9712     |
| 377  | chr17 | 2294412   | 2311449   | MNT          | MAX network transcriptional repressor                                       | 50545.3716     |
| 378  | chr5  | 60558584  | 60631810  | ZSWIM6       | zinc finger SWIM-type containing 6                                          | 50357.5202     |
| 379  | chr10 | 92671251  | 92694036  | ANKRD1       | ankyrin repeat domain 1                                                     | 50227.254      |
| 380  | chr2  | 110856191 | 110874869 | MALL         | mal, T-cell differentiation protein-like                                    | 50227.0098     |
| 381  | chr2  | 37869801  | 37917334  | CDC42EP3     | CDC42 effector protein 3                                                    | 50223.3678     |
| 382  | chr11 | 118779259 | 118801210 | MIR4492      | microRNA 4492                                                               | 50206.3272     |
| 383  | chr3  | 50353720  | 50363956  | HYAL2        | hyaluronoglucosaminidase 2                                                  | 50189.1552     |
| 384  | chr2  | 159885124 | 159958832 | TANC1        | tetratricopeptide repeat, ankyrin repeat and coiled-coil containing 1       | 50150.9232     |
| 385  | chr6  | 86158635  | 86176475  | NT5E         | 5'-nucleotidase ecto                                                        | 50137.536      |
| 386  | chr12 | 46757347  | 46797912  | SLC38A2      | solute carrier family 38 member 2                                           | 50093.7185     |
| 387  | chr14 | 105939416 | 105949914 | CRIP2        | cysteine rich protein 2                                                     | 49965.231      |
| 388  | chr7  | 137637767 | 137688169 | LOC100130880 | uncharacterized LOC100130880                                                | 49787.0956     |
| 389  | chr16 | 73085818  | 73105845  | ZFHX3        | zinc finger homeobox 3                                                      | 49628.9087     |
| 390  | chr12 | 52400605  | 52440853  | GRASP        | GRP1 (general receptor for phosphoinositides 1)-associated scaffold protein | 49589.5608     |
| 391  | chr19 | 3422827   | 3461405   | SMIM24       | small integral membrane protein 24                                          | 49534.152      |
| 392  | chr18 | 8776869   | 8815094   | MTCL1        | microtubule crosslinking factor 1                                           | 49512.8425     |
| 393  | chr21 | 46284762  | 46302887  | PTTG1IP      | pituitary tumor-transforming 1 interacting protein                          | 49470.375      |
| 394  | chr1  | 201453974 | 201477419 | CSRP1        | cysteine and glycine rich protein 1                                         | 49426.749      |
| 395  | chr3  | 184048335 | 184057433 | FAM131A      | family with sequence similarity 131 member A                                | 49421.2458     |
| 396  | chr5  | 141184158 | 141231551 | PCDH1        | protocadherin 1                                                             | 49369.2881     |
| 397  | chr3  | 141107232 | 141146918 | ZBTB38       | zinc finger and BTB domain containing 38                                    | 49337.6352     |
| 398  | chr5  | 73923462  | 73940423  | HEXB         | hexosaminidase subunit beta                                                 | 49286.9699     |
| 399  | chr15 | 40615254  | 40637429  | C15orf52     | chromosome 15 open reading frame 52                                         | 49250.675      |

| Rank | chr   | start     | end       | Gene        | Gene description                                                           | H3K27ac signal |
|------|-------|-----------|-----------|-------------|----------------------------------------------------------------------------|----------------|
| 400  | chr20 | 19781960  | 19821850  | RIN2        | Ras and Rab interactor 2                                                   | 49224.26       |
| 401  | chr5  | 139623295 | 139648921 | PFDN1       | prefoldin subunit 1                                                        | 49222.4208     |
| 402  | chr14 | 77412839  | 77429282  | IRF2BP1     | interferon regulatory factor 2 binding protein-like                        | 49125.1068     |
| 403  | chr14 | 61564757  | 61572746  | PRKCH       | protein kinase C eta                                                       | 49119.5676     |
| 404  | chr8  | 68853654  | 68944316  | PREX2       | phosphatidylinositol-3,4,5-trisphosphate-dependent Rac exchange factor 2   | 49039.0758     |
| 405  | chr5  | 148667027 | 148730130 | AFAP1L1     | actin filament associated protein 1 like 1                                 | 48955.3074     |
| 406  | chr6  | 32934116  | 32942892  | BRD2        | bromodomain containing 2                                                   | 48927.0776     |
| 407  | chr5  | 141570711 | 141632115 | SPRY4       | sprouty RTK signaling antagonist 4                                         | 48896.0052     |
| 408  | chr20 | 23120881  | 23161834  | LINC00656   | long intergenic non-protein coding RNA 656                                 | 48885.5961     |
| 409  | chr16 | 88267259  | 88280235  | ZNF469      | zinc finger protein 469                                                    | 48836.4736     |
| 410  | chr15 | 64124559  | 64153381  | HERC1       | HECT and RLD domain containing E3 ubiquitin protein ligase family member 1 | 48746.6486     |
| 411  | chr3  | 99352188  | 99390233  | COL8A1      | collagen type VIII alpha 1                                                 | 48716.6225     |
| 412  | chr8  | 129179298 | 129198763 | MIR1208     | microRNA 1208                                                              | 48683.9115     |
| 413  | chr5  | 66298589  | 66313565  | MAST4       | microtubule associated serine/threonine kinase family member 4             | 48589.632      |
| 414  | chr2  | 161225492 | 161291735 | MIR4785     | microRNA 4785                                                              | 48509.7489     |
| 415  | chr14 | 62026571  | 62033942  | FLJ22447    | uncharacterized LOC400221                                                  | 48508.551      |
| 416  | chr2  | 238511196 | 238527885 | LRRFIP1     | leucine rich repeat (in FLII) interacting protein 1                        | 48464.856      |
| 417  | chr8  | 49319045  | 49346166  | EFCAB1      | EF-hand calcium binding domain 1                                           | 48115.3661     |
| 418  | chr1  | 150575472 | 150596397 | ENSA        | endosulfine alpha                                                          | 48089.835      |
| 419  | chr9  | 14170062  | 14252321  | NFIB        | nuclear factor I/B                                                         | 47841.8344     |
| 420  | chr6  | 12288091  | 12299871  | EDN1        | endothelin 1                                                               | 47774.968      |
| 421  | chr2  | 112247116 | 112254781 | MIR4435-2HG | MIR4435-2 host gene                                                        | 47763.681      |
| 422  | chr13 | 28952320  | 28988985  | FLT1        | fms related tyrosine kinase 1                                              | 47756.1625     |
| 423  | chr1  | 154938549 | 154949909 | MIR4258     | microRNA 4258                                                              | 47738.128      |
| 424  | chr1  | 161154787 | 161177615 | NDUFS2      | NADH:ubiquinone oxidoreductase core subunit S2                             | 47575.8348     |
| 425  | chr3  | 57934962  | 57971838  | FLNB        | filamin B                                                                  | 47474.1624     |
| 426  | chr1  | 59346222  | 59377199  | LINC01135   | long intergenic non-protein coding RNA 1135                                | 47357.6376     |
| 427  | chr1  | 43935912  | 43944156  | HYI         | hydroxypyruvate isomerase (putative)                                       | 47266.974      |
| 428  | chr22 | 30804023  | 30832897  | SEC14L2     | SEC14 like lipid binding 2                                                 | 47217.6522     |
| 429  | chr1  | 231522153 | 231559441 | EGLN1       | egl-9 family hypoxia-inducible factor 1                                    | 47169.32       |
| 430  | chr5  | 39500217  | 39548277  | DAB2        | Dab, mitogen-responsive phosphoprotein, homolog 2 (Drosophila)             | 47127.636      |
| 431  | chr9  | 116713898 | 116721461 | ZNF618      | zinc finger protein 618                                                    | 47029.0029     |
| 432  | chr11 | 111784395 | 111818713 | DIXDC1      | DIX domain containing 1                                                    | 46933.2968     |
| 433  | chr9  | 37915738  | 37970760  | SLC25A51    | solute carrier family 25 member 51                                         | 46900.7528     |
| 434  | chr4  | 56025571  | 56054076  | KDR         | kinase insert domain receptor                                              | 46890.725      |
| 435  | chrX  | 99896826  | 99941255  | SRPX2       | sushi repeat containing protein, X-linked 2                                | 46783.737      |
| 436  | chr10 | 3844622   | 3854912   | KLF6        | Kruppel-like factor 6                                                      | 46734.093      |
| 437  | chr9  | 125576840 | 125591571 | PDCL        | phosducin like                                                             | 46709.0548     |
| 438  | chr3  | 71083083  | 71117008  | FOXP1       | forkhead box P1                                                            | 46456.895      |
| 439  | chr6  | 3735967   | 3754926   | PXDC1       | PX domain containing 1                                                     | 46373.714      |
| 440  | chr14 | 105657930 | 105666947 | NUDT14      | nudix hydrolase 14                                                         | 46351.8885     |
| 441  | chr6  | 132450957 | 132457836 | LINC01013   | long intergenic non-protein coding RNA 1013                                | 46304.6127     |
| 442  | chr19 | 48610048  | 48630948  | PLA2G4C     | phospholipase A2 group IVC                                                 | 46276.78       |
| 443  | chr8  | 55221482  | 55252806  | SOX17       | SRY-box 17                                                                 | 46271.8128     |
| 444  | chr22 | 46460348  | 46478683  | MIRLET7BHG  | MIRLET7B host gene                                                         | 46242.7035     |

| Rank | chr   | start     | end       | Gene      | Gene description                                              | H3K27ac signal |
|------|-------|-----------|-----------|-----------|---------------------------------------------------------------|----------------|
| 445  | chr9  | 95414886  | 95434813  | IPPK      | inositol-pentakisphosphate 2-kinase                           | 46204.7349     |
| 446  | chr16 | 55504280  | 55540769  | MMP2      | matrix metalloproteinase 2                                    | 46180.4784     |
| 447  | chr18 | 22806590  | 22835080  | ZNF521    | zinc finger protein 521                                       | 46116.763      |
| 448  | chr11 | 86428643  | 86456548  | ME3       | malic enzyme 3, NADP(+)-dependent, mitochondrial              | 46096.2695     |
| 449  | chr7  | 104648466 | 104658800 | KMT2E-AS1 | KMT2E antisense RNA 1 (head to head)                          | 46074.139      |
| 450  | chr19 | 16175998  | 16208100  | TPM4      | tropomyosin 4                                                 | 46040.6884     |
| 451  | chr9  | 117651646 | 117665848 | TNFSF8    | tumor necrosis factor superfamily member 8                    | 46024.4214     |
| 452  | chr9  | 132243652 | 132269839 | LINC00963 | long intergenic non-protein coding RNA 963                    | 45979.1346     |
| 453  | chr20 | 23329337  | 23356027  | NXT1      | nuclear transport factor 2-like export factor 1               | 45880.11       |
| 454  | chr2  | 71717691  | 71733523  | DYSF      | dysferlin                                                     | 45863.7208     |
| 455  | chr3  | 177060668 | 177079906 | LINC00578 | long intergenic non-protein coding RNA 578                    | 45824.916      |
| 456  | chr10 | 31252447  | 31303765  | ZNF438    | zinc finger protein 438                                       | 45708.9426     |
| 457  | chr19 | 16425720  | 16463285  | KLF2      | Kruppel-like factor 2                                         | 45671.527      |
| 458  | chr2  | 151319138 | 151349487 | RND3      | Rho family GTPase 3                                           | 45638.8262     |
| 459  | chr5  | 141057635 | 141064107 | ARAP3     | ArfGAP with RhoGAP domain, ankyrin repeat and PH domain 3     | 45628.8944     |
| 460  | chr12 | 66022868  | 66054582  | HMGA2     | high mobility group AT-hook 2                                 | 45573.018      |
| 461  | chr6  | 17829101  | 17871005  | KIF13A    | kinesin family member 13A                                     | 45537.0768     |
| 462  | chr6  | 34190771  | 34217791  | C6orf1    | chromosome 6 open reading frame 1                             | 45531.402      |
| 463  | chr2  | 237778562 | 237799406 | COPS8     | COP9 signalosome subunit 8                                    | 45437.8356     |
| 464  | chr22 | 32020743  | 32059185  | PISD      | phosphatidylserine decarboxylase                              | 45388.4694     |
| 465  | chr6  | 136355016 | 136400144 | PDE7B     | phosphodiesterase 7B                                          | 45213.7432     |
| 466  | chr6  | 134489094 | 134501143 | SGK1      | serum/glucocorticoid regulated kinase 1                       | 45163.2667     |
| 467  | chr12 | 45608157  | 45630339  | ANO6      | anoctamin 6                                                   | 45160.3338     |
| 468  | chr14 | 69500314  | 69527724  | ACTN1-AS1 | ACTN1 antisense RNA 1                                         | 45127.824      |
| 469  | chr1  | 16073486  | 16089848  | FBLIM1    | filamin binding LIM protein 1                                 | 44799.156      |
| 470  | chr9  | 131888494 | 131909455 | PPP2R4    | protein phosphatase 2A regulatory subunit 4                   | 44743.3506     |
| 471  | chr16 | 86596680  | 86625076  | FOXL1     | forkhead box L1                                               | 44726.5396     |
| 472  | chr3  | 193971756 | 193990785 | LINC00887 | long intergenic non-protein coding RNA 887                    | 44666.7717     |
| 473  | chr22 | 50323285  | 50364932  | PIM3      | Pim-3 proto-oncogene, serine/threonine kinase                 | 44553.9606     |
| 474  | chr14 | 90848345  | 90886727  | CALM1     | calmodulin 1 (phosphorylase kinase, delta)                    | 44465.547      |
| 475  | chr18 | 19746590  | 19774999  | GATA6-AS1 | GATA6 antisense RNA 1 (head to head)                          | 44462.9259     |
| 476  | chr18 | 8704044   | 8752689   | MTCL1     | microtubule crosslinking factor 1                             | 44354.511      |
| 477  | chr10 | 5983368   | 6020478   | IL15RA    | interleukin 15 receptor subunit alpha                         | 44186.877      |
| 478  | chr1  | 214574393 | 214630384 | PTPN14    | protein tyrosine phosphatase, non-receptor type 14            | 44165.7008     |
| 479  | chr11 | 103456279 | 103505834 | MIR4693   | microRNA 4693                                                 | 44079.1725     |
| 480  | chr16 | 81638015  | 81669172  | CMIP      | c-Maf inducing protein                                        | 43946.9485     |
| 481  | chr9  | 5487467   | 5512950   | PDCD1LG2  | programmed cell death 1 ligand 2                              | 43917.4022     |
| 482  | chr4  | 145546782 | 145589364 | HHIP      | hedgehog interacting protein                                  | 43855.2018     |
| 483  | chr9  | 124039564 | 124052655 | GSN       | gelsolin                                                      | 43826.0498     |
| 484  | chr16 | 87983588  | 88001097  | BANP      | BTG3 associated nuclear protein                               | 43798.7635     |
| 485  | chr1  | 68295105  | 68323002  | GNG12-AS1 | GNG12 antisense RNA 1                                         | 43736.9166     |
| 486  | chr1  | 227615035 | 227621411 | CDC42BPA  | CDC42 binding protein kinase alpha                            | 43700.4664     |
| 487  | chr10 | 59995571  | 60044501  | IPMK      | inositol polyphosphate multikinase                            | 43684.704      |
| 488  | chr21 | 38729253  | 38749227  | DYRK1A    | dual specificity tyrosine phosphorylation regulated kinase 1A | 43665.1614     |
| 489  | chr3  | 141079485 | 141090213 | ZBTB38    | zinc finger and BTB domain containing 38                      | 43617.9024     |

| Rank | chr   | start     | end       | Gene      | Gene description                                                      | H3K27ac signal |
|------|-------|-----------|-----------|-----------|-----------------------------------------------------------------------|----------------|
| 490  | chr16 | 66541738  | 66559144  | TK2       | thymidine kinase 2, mitochondrial                                     | 43603.7706     |
| 491  | chr12 | 125196895 | 125232693 | SCARB1    | scavenger receptor class B member 1                                   | 43598.3842     |
| 492  | chr19 | 11241065  | 11291803  | SPC24     | SPC24, NDC80 kinetochore complex component                            | 43589.0158     |
| 493  | chr10 | 99293582  | 99304969  | ANKRD2    | ankyrin repeat domain 2                                               | 43584.8812     |
| 494  | chr17 | 36603015  | 36630028  | ARHGAP23  | Rho GTPase activating protein 23                                      | 43566.5664     |
| 495  | chr10 | 94571418  | 94610800  | EXOC6     | exocyst complex component 6                                           | 43532.8628     |
| 496  | chr3  | 45672008  | 45712383  | LIMD1-AS1 | LIMD1 antisense RNA 1                                                 | 43532.325      |
| 497  | chr22 | 36835024  | 36868015  | TXN2      | thioredoxin 2                                                         | 43525.0263     |
| 498  | chr18 | 20804035  | 20819467  | CABLES1   | Cdk5 and Abl enzyme substrate 1                                       | 43484.2896     |
| 499  | chr5  | 72898836  | 72952298  | ARHGEF28  | Rho guanine nucleotide exchange factor 28                             | 43469.9522     |
| 500  | chr3  | 145873369 | 145915695 | PLOD2     | procollagen-lysine, 2-oxoglutarate 5-dioxygenase 2                    | 43443.4064     |
| 501  | chr1  | 94642448  | 94732671  | ARHGAP29  | Rho GTPase activating protein 29                                      | 43415.3076     |
| 502  | chr15 | 41196458  | 41235507  | DLL4      | delta-like 4 (Drosophila)                                             | 43352.1998     |
| 503  | chr2  | 87753142  | 87758634  | LINC00152 | long intergenic non-protein coding RNA 152                            | 43094.6256     |
| 504  | chr12 | 6430963   | 6457470   | TNFRSF1A  | tumor necrosis factor receptor superfamily member 1A                  | 43071.2243     |
| 505  | chr18 | 46448305  | 46487531  | SMAD7     | SMAD family member 7                                                  | 43011.309      |
| 506  | chr16 | 87489826  | 87501185  | ZCCHC14   | zinc finger CCHC-type containing 14                                   | 42997.2227     |
| 507  | chr3  | 159540667 | 159603318 | SCHIP1    | schwannomin interacting protein 1                                     | 42922.2001     |
| 508  | chr8  | 41980787  | 42013983  | AP3M2     | adaptor related protein complex 3 mu 2 subunit                        | 42919.1084     |
| 509  | chr9  | 35508637  | 35522483  | RUSC2     | RUN and SH3 domain containing 2                                       | 42838.1394     |
| 510  | chr3  | 111564152 | 111594186 | PHLDB2    | pleckstrin homology like domain family B member 2                     | 42780.4296     |
| 511  | chr3  | 111619534 | 111686992 | PHLDB2    | pleckstrin homology like domain family B member 2                     | 42754.8804     |
| 512  | chr4  | 55933762  | 55947530  | KDR       | kinase insert domain receptor                                         | 42745.5096     |
| 513  | chr5  | 169396127 | 169418027 | FAM196B   | family with sequence similarity 196 member B                          | 42731.28       |
| 514  | chr14 | 74249742  | 74270201  | ELMSAN1   | ELM2 and Myb/SANT-like domain containing 1                            | 42687.7035     |
| 515  | chr12 | 11849871  | 11901402  | ETV6      | ETS variant 6                                                         | 42683.1273     |
| 516  | chr3  | 15332026  | 15374833  | SH3BP5    | SH3-domain binding protein 5                                          | 42588.6843     |
| 517  | chr7  | 47979412  | 47991415  | PKD1L1    | polycystin 1 like 1, transient receptor potential channel interacting | 42494.2209     |
| 518  | chr10 | 127729274 | 127752801 | FANK1     | fibronectin type III and ankyrin repeat domains 1                     | 42395.654      |
| 519  | chr20 | 37427180  | 37460293  | PPP1R16B  | protein phosphatase 1 regulatory subunit 16B                          | 42361.4609     |
| 520  | chr11 | 2398438   | 2424305   | TSSC4     | tumor suppressing subtransferable candidate 4                         | 42186.4903     |
| 521  | chr8  | 145001890 | 145027401 | PLEC      | plectin                                                               | 42164.5808     |
| 522  | chr8  | 10566986  | 10589116  | SOX7      | SRY-box 7                                                             | 42126.668      |
| 523  | chr1  | 23491911  | 23526140  | HTR1D     | 5-hydroxytryptamine receptor 1D                                       | 42074.2868     |
| 524  | chr19 | 45347509  | 45374496  | NECTIN2   | nectin cell adhesion molecule 2                                       | 42070.0343     |
| 525  | chr12 | 118099654 | 118126726 | KSR2      | kinase suppressor of ras 2                                            | 42013.0368     |
| 526  | chr8  | 134531969 | 134597137 | ST3GAL1   | ST3 beta-galactoside alpha-2,3-sialyltransferase 1                    | 42007.2928     |
| 527  | chr1  | 25030753  | 25099953  | CLIC4     | chloride intracellular channel 4                                      | 41997.48       |
| 528  | chr7  | 131303077 | 131328571 | PODXL     | podocalyxin like                                                      | 41940.1794     |
| 529  | chr6  | 126101265 | 126162051 | NCOA7     | nuclear receptor coactivator 7                                        | 41918.0256     |
| 530  | chr22 | 35694489  | 35727481  | TOM1      | target of myb1 membrane trafficking protein                           | 41893.2416     |
| 531  | chr2  | 56109410  | 56152051  | EFEMP1    | EGF containing fibulin-like extracellular matrix protein 1            | 41822.2928     |
| 532  | chr2  | 1710953   | 1760482   | PXDN      | peroxidasin                                                           | 41802.476      |
| 533  | chr8  | 128805922 | 128829620 | MIR1204   | microRNA 1204                                                         | 41755.876      |
| 534  | chr7  | 50879731  | 50908227  | GRB10     | growth factor receptor bound protein 10                               | 41726.6928     |

| Rank | chr   | start     | end       | Gene         | Gene description                                             | H3K27ac signal |
|------|-------|-----------|-----------|--------------|--------------------------------------------------------------|----------------|
| 535  | chr4  | 78837398  | 78855428  | MRPL1        | mitochondrial ribosomal protein L1                           | 41606.028      |
| 536  | chr3  | 128198376 | 128212235 | GATA2        | GATA binding protein 2                                       | 41522.9499     |
| 537  | chr8  | 26114376  | 26126416  | PPP2R2A      | protein phosphatase 2 regulatory subunit B, alpha            | 41504.288      |
| 538  | chr5  | 131592525 | 131603943 | PDLIM4       | PDZ and LIM domain 4                                         | 41454.1908     |
| 539  | chr17 | 62078249  | 62103649  | ICAM2        | intercellular adhesion molecule 2                            | 41351.2        |
| 540  | chr22 | 29998610  | 30032565  | NF2          | neurofibromin 2 (merlin)                                     | 41336.817      |
| 541  | chr7  | 640445    | 660691    | PRKAR1B      | protein kinase cAMP-dependent type I regulatory subunit beta | 41332.209      |
| 542  | chr8  | 55046974  | 55093698  | MRPL15       | mitochondrial ribosomal protein L15                          | 41322.7056     |
| 543  | chr3  | 5054602   | 5069518   | BHLHE40-AS1  | BHLHE40 antisense RNA 1                                      | 41318.8116     |
| 544  | chr2  | 28805346  | 28846017  | PLB1         | phospholipase B1                                             | 41289.1992     |
| 545  | chr22 | 25506006  | 25543365  | LOC100128531 | uncharacterized LOC100128531                                 | 41251.8078     |
| 546  | chr19 | 47676285  | 47715750  | MIR3190      | microRNA 3190                                                | 41043.6        |
| 547  | chr19 | 6085543   | 6111915   | RFX2         | regulatory factor X2                                         | 41026.9204     |
| 548  | chr2  | 178102987 | 178140882 | MIR3128      | microRNA 3128                                                | 41013.7585     |
| 549  | chr14 | 61927232  | 61947049  | PRKCH        | protein kinase C eta                                         | 40896.3429     |
| 550  | chrX  | 45602036  | 45669243  | MIR221       | microRNA 221                                                 | 40895.4595     |
| 551  | chr11 | 128041074 | 128082002 | ETS1         | ETS proto-oncogene 1, transcription factor                   | 40764.288      |
| 552  | chr10 | 75645774  | 75672136  | PLAU         | plasminogen activator, urokinase                             | 40563.2094     |
| 553  | chr20 | 10602727  | 10656474  | JAG1         | jagged 1                                                     | 40562.8609     |
| 554  | chr12 | 96864863  | 96910767  | CDK17        | cyclin-dependent kinase 17                                   | 40551.5936     |
| 555  | chr3  | 149083873 | 149120825 | TM4SF1       | transmembrane 4 L six family member 1                        | 40547.4296     |
| 556  | chr7  | 139734253 | 139763720 | PARP12       | poly(ADP-ribose) polymerase family member 12                 | 40520.0717     |
| 557  | chr5  | 42988228  | 42997098  | LOC648987    | uncharacterized LOC648987                                    | 40495.985      |
| 558  | chr5  | 133884985 | 133918251 | JADE2        | jade family PHD finger 2                                     | 40488.0486     |
| 559  | chr1  | 235046954 | 235070019 | LINC01132    | long intergenic non-protein coding RNA 1132                  | 40430.6385     |
| 560  | chr12 | 124905710 | 124952336 | NCOR2        | nuclear receptor corepressor 2                               | 40270.8762     |
| 561  | chr15 | 39109282  | 39139297  | C15orf53     | chromosome 15 open reading frame 53                          | 40238.109      |
| 562  | chr19 | 12887958  | 12905706  | JUNB         | jun B proto-oncogene                                         | 40225.842      |
| 563  | chr2  | 225263189 | 225283614 | FAM124B      | family with sequence similarity 124 member B                 | 40200.485      |
| 564  | chr22 | 37877566  | 37922556  | CARD10       | caspase recruitment domain family member 10                  | 40099.587      |
| 565  | chr1  | 94073030  | 94103055  | BCAR3        | breast cancer anti-estrogen resistance 3                     | 40059.355      |
| 566  | chr22 | 37571920  | 37596635  | C1QTNF6      | C1q and tumor necrosis factor related protein 6              | 40058.072      |
| 567  | chr10 | 3493243   | 3515373   | PITRM1       | pitrilysin metalloproteinase 1                               | 40039.809      |
| 568  | chr9  | 101078720 | 101139000 | TBC1D2       | TBC1 domain family member 2                                  | 40007.836      |
| 569  | chr17 | 68153074  | 68170765  | KCNJ2        | potassium voltage-gated channel subfamily J member 2         | 39992.2746     |
| 570  | chr4  | 129423270 | 129451406 | PGRMC2       | progesterone receptor membrane component 2                   | 39975.6288     |
| 571  | chr15 | 39649179  | 39659831  | C15orf54     | chromosome 15 open reading frame 54                          | 39968.4344     |
| 572  | chr17 | 79517761  | 79551904  | NPLOC4       | NPL4 homolog, ubiquitin recognition factor                   | 39906.3384     |
| 573  | chr1  | 209995527 | 210018047 | DIEXF        | digestive organ expansion factor homolog (zebrafish)         | 39889.676      |
| 574  | chr5  | 141658957 | 141678494 | SPRY4        | sprouty RTK signaling antagonist 4                           | 39876.9707     |
| 575  | chr13 | 99596419  | 99636897  | DOCK9        | dedicator of cytokinesis 9                                   | 39874.8778     |
| 576  | chr13 | 40436169  | 40475462  | MIR4305      | microRNA 4305                                                | 39858.8192     |
| 577  | chr2  | 109195333 | 109214139 | LIMS1        | LIM zinc finger domain containing 1                          | 39832.9886     |
| 578  | chr1  | 21648348  | 21673112  | ECE1         | endothelin converting enzyme 1                               | 39788.3188     |
| 579  | chr4  | 10089401  | 10126639  | WDR1         | WD repeat domain 1                                           | 39710.6032     |



| Rank | chr   | start     | end       | Gene       | Gene description                                               | H3K27ac signal |
|------|-------|-----------|-----------|------------|----------------------------------------------------------------|----------------|
| 580  | chr3  | 81772370  | 81812120  | GBE1       | glucan (1,4-alpha-), branching enzyme 1                        | 39626.775      |
| 581  | chr21 | 43345567  | 43382942  | C2CD2      | C2 calcium-dependent domain containing 2                       | 39576.3875     |
| 582  | chr15 | 95381573  | 95390967  | LOC440311  | glioma tumor suppressor candidate region gene 2 pseudogene     | 39529.952      |
| 583  | chr11 | 107689032 | 107731012 | SLC35F2    | solute carrier family 35 member F2                             | 39486.388      |
| 584  | chr8  | 22905960  | 22950966  | LOC254896  | uncharacterized LOC254896                                      | 39465.7614     |
| 585  | chr12 | 52557396  | 52589292  | KRT80      | keratin 80                                                     | 39433.0248     |
| 586  | chr17 | 38253769  | 38292089  | MSL1       | male-specific lethal 1 homolog (Drosophila)                    | 39431.28       |
| 587  | chr19 | 6218116   | 6245386   | MLLT1      | myeloid/lymphoid or mixed-lineage leukemia; translocated to, 1 | 39416.058      |
| 588  | chr6  | 157448972 | 157474230 | ARID1B     | AT-rich interaction domain 1B                                  | 39387.3252     |
| 589  | chr9  | 128393381 | 128439454 | MAPKAP1    | mitogen-activated protein kinase associated protein 1          | 39364.7712     |
| 590  | chr8  | 119015570 | 119039511 | EXT1       | exostosin glycosyltransferase 1                                | 39318.3043     |
| 591  | chr1  | 68637892  | 68647865  | MIR1262    | microRNA 1262                                                  | 39302.5957     |
| 592  | chr3  | 52078870  | 52090426  | DUSP7      | dual specificity phosphatase 7                                 | 39285.7776     |
| 593  | chr7  | 30498531  | 30519537  | NOD1       | nucleotide binding oligomerization domain containing 1         | 39268.6164     |
| 594  | chr1  | 120173338 | 120192169 | ZNF697     | zinc finger protein 697                                        | 39264.5181     |
| 595  | chr8  | 26464187  | 26473273  | DPYSL2     | dihydropyrimidinase like 2                                     | 39230.6222     |
| 596  | chr16 | 27323910  | 27348285  | IL4R       | interleukin 4 receptor                                         | 39109.6875     |
| 597  | chr5  | 150011549 | 150025370 | SYNPO      | synaptopodin                                                   | 39092.6985     |
| 598  | chr1  | 19755550  | 19813809  | CAPZB      | capping actin protein of muscle Z-line beta subunit            | 39062.6595     |
| 599  | chr1  | 47673162  | 47708150  | TAL1       | T-cell acute lymphocytic leukemia 1                            | 39057.1044     |
| 600  | chr6  | 86110120  | 86116848  | NT5E       | 5'-nucleotidase ecto                                           | 39021.7272     |
| 601  | chr15 | 42782047  | 42804497  | SNAP23     | synaptosome associated protein 23kDa                           | 38995.65       |
| 602  | chr17 | 61476061  | 61529605  | CYB561     | cytochrome b561                                                | 38953.26       |
| 603  | chr1  | 43388603  | 43411293  | SLC2A1-AS1 | SLC2A1 antisense RNA 1                                         | 38945.116      |
| 604  | chr1  | 61408245  | 61430322  | NFIA       | nuclear factor I/A                                             | 38842.2738     |
| 605  | chr19 | 39918325  | 39927420  | RPS16      | ribosomal protein S16                                          | 38715.596      |
| 606  | chr1  | 16248952  | 16294373  | ZBTB17     | zinc finger and BTB domain containing 17                       | 38621.4763     |
| 607  | chr12 | 12866720  | 12890992  | CDKN1B     | cyclin-dependent kinase inhibitor 1B                           | 38587.6256     |
| 608  | chr1  | 12654570  | 12680436  | DHRS3      | dehydrogenase/reductase (SDR family) member 3                  | 38586.8988     |
| 609  | chr1  | 65886194  | 65898412  | LEPR       | leptin receptor                                                | 38562.4516     |
| 610  | chr10 | 82166660  | 82178604  | FAM213A    | family with sequence similarity 213 member A                   | 38382.044      |
| 611  | chr20 | 43200748  | 43245818  | ADA        | adenosine deaminase                                            | 38363.584      |
| 612  | chr11 | 73017243  | 73047294  | ARHGEF17   | Rho guanine nucleotide exchange factor 17                      | 38306.0097     |
| 613  | chr17 | 47891374  | 47929568  | KAT7       | lysine acetyltransferase 7                                     | 38262.7492     |
| 614  | chr19 | 1245872   | 1267385   | MIDN       | midnolin                                                       | 38133.9438     |
| 615  | chr6  | 34981838  | 35017423  | ANKS1A     | ankyrin repeat and sterile alpha motif domain containing 1A    | 38132.886      |
| 616  | chr5  | 52278788  | 52342057  | ITGA2      | integrin subunit alpha 2                                       | 38132.2263     |
| 617  | chr1  | 33445542  | 33473551  | RNF19B     | ring finger protein 19B                                        | 38081.0364     |
| 618  | chr9  | 35904285  | 35912492  | LINC00961  | long intergenic non-protein coding RNA 961                     | 38058.3211     |
| 619  | chr2  | 64487092  | 64504998  | LINC00309  | long intergenic non-protein coding RNA 309                     | 38052.0406     |
| 620  | chr6  | 148625044 | 148669159 | SASH1      | SAM and SH3 domain containing 1                                | 38044.776      |
| 621  | chr11 | 65138006  | 65159729  | SLC25A45   | solute carrier family 25 member 45                             | 38034.8007     |
| 622  | chr16 | 67549482  | 67607064  | CTCF       | CCCTC-binding factor                                           | 37975.329      |
| 623  | chr6  | 134739441 | 134759287 | LINC01010  | long intergenic non-protein coding RNA 1010                    | 37969.3672     |
| 624  | chr11 | 58340187  | 58348883  | ZFP91-CNTF | ZFP91-CNTF readthrough (NMD candidate)                         | 37965.8664     |

| Rank | chr   | start     | end       | Gene           | Gene description                                               | H3K27ac signal |
|------|-------|-----------|-----------|----------------|----------------------------------------------------------------|----------------|
| 625  | chr8  | 40010065  | 40033670  | C8orf4         | chromosome 8 open reading frame 4                              | 37947.398      |
| 626  | chr14 | 35852457  | 35889861  | NFKBIA         | NFKB inhibitor alpha                                           | 37942.6176     |
| 627  | chr19 | 54958298  | 54983353  | LENG8          | leukocyte receptor cluster (LRC) member 8                      | 37923.248      |
| 628  | chr15 | 101706473 | 101742517 | CHSY1          | chondroitin sulfate synthase 1                                 | 37864.222      |
| 629  | chr13 | 40763789  | 40782083  | LINC00332      | long intergenic non-protein coding RNA 332                     | 37819.1862     |
| 630  | chr14 | 69237210  | 69263600  | ZFP36L1        | ZFP36 ring finger protein-like 1                               | 37793.119      |
| 631  | chr15 | 93159265  | 93199772  | FAM174B        | family with sequence similarity 174 member B                   | 37793.031      |
| 632  | chr13 | 110867562 | 110920082 | COL4A1         | collagen type IV alpha 1                                       | 37767.132      |
| 633  | chr6  | 3909183   | 3918045   | FAM50B         | family with sequence similarity 50 member B                    | 37707.81       |
| 634  | chr1  | 175474597 | 175491714 | TNR            | tenascin R                                                     | 37705.3276     |
| 635  | chr7  | 22520082  | 22541230  | STEAP1B        | STEAP family member 1B                                         | 37692.0804     |
| 636  | chr10 | 35656896  | 35677623  | CCNY           | cyclin Y                                                       | 37685.8314     |
| 637  | chr4  | 38664315  | 38691862  | KLF3           | Kruppel-like factor 3 (basic)                                  | 37659.5037     |
| 638  | chr5  | 14427667  | 14478864  | FAM105A        | family with sequence similarity 105 member A                   | 37609.3162     |
| 639  | chr19 | 6268650   | 6280173   | MLLT1          | myeloid/lymphoid or mixed-lineage leukemia; translocated to, 1 | 37590.3306     |
| 640  | chr17 | 57499677  | 57519934  | MIR4729        | microRNA 4729                                                  | 37586.8635     |
| 641  | chr3  | 46966789  | 47004011  | CCDC12         | coiled-coil domain containing 12                               | 37553.2758     |
| 642  | chr1  | 94555951  | 94562194  | ABCA4          | ATP binding cassette subfamily A member 4                      | 37532.916      |
| 643  | chr15 | 77773007  | 77801872  | HMG20A         | high mobility group 20A                                        | 37521.6135     |
| 644  | chr16 | 87869342  | 87903756  | SLC7A5         | solute carrier family 7 member 5                               | 37449.3148     |
| 645  | chr1  | 43669919  | 43675016  | EBNA1BP2       | EBNA1 binding protein 2                                        | 37366.107      |
| 646  | chr20 | 51105716  | 51115050  | ZFP64          | ZFP64 zinc finger protein                                      | 37359.335      |
| 647  | chr15 | 86121513  | 86165183  | AKAP13         | A-kinase anchoring protein 13                                  | 37342.217      |
| 648  | chr17 | 76856936  | 76881348  | TIMP2          | TIMP metalloproteinase inhibitor 2                             | 37330.8304     |
| 649  | chr12 | 26829765  | 26859907  | ITPR2          | inositol 1,4,5-trisphosphate receptor type 2                   | 37315.796      |
| 650  | chr5  | 71882103  | 71902689  | ZNF366         | zinc finger protein 366                                        | 37291.539      |
| 651  | chr6  | 44007801  | 44041264  | C6orf223       | chromosome 6 open reading frame 223                            | 37230.9338     |
| 652  | chr1  | 153536703 | 153542142 | S100A2         | S100 calcium binding protein A2                                | 37154.8968     |
| 653  | chr20 | 62312379  | 62332473  | RTEL1-TNFRSF6B | RTEL1-TNFRSF6B readthrough (NMD candidate)                     | 37097.5428     |
| 654  | chr7  | 129587614 | 129611611 | UBE2H          | ubiquitin conjugating enzyme E2H                               | 37068.1659     |
| 655  | chr12 | 104669615 | 104701025 | EID3           | EP300 interacting inhibitor of differentiation 3               | 37057.518      |
| 656  | chr1  | 183837877 | 183859119 | COLGALT2       | collagen beta(1-O)galactosyltransferase 2                      | 36980.1978     |
| 657  | chr10 | 33268357  | 33276050  | ITGB1          | integrin subunit beta 1                                        | 36937.1702     |
| 658  | chr20 | 20710803  | 20747438  | RALGAPA2       | Ral GTPase activating protein catalytic alpha subunit 2        | 36873.1275     |
| 659  | chr3  | 156873798 | 156895065 | CCNL1          | cyclin L1                                                      | 36840.8241     |
| 660  | chr3  | 41010770  | 41019459  | CTNNB1         | catenin beta 1                                                 | 36815.293      |
| 661  | chr2  | 204546039 | 204557836 | CD28           | CD28 molecule                                                  | 36788.9445     |
| 662  | chr19 | 3140172   | 3163540   | GNA15          | G protein subunit alpha 15                                     | 36767.2112     |
| 663  | chr7  | 4763505   | 4789954   | AP5Z1          | adaptor related protein complex 5 zeta 1 subunit               | 36708.5671     |
| 664  | chr2  | 43384880  | 43407124  | ZFP36L2        | ZFP36 ring finger protein-like 2                               | 36651.4388     |
| 665  | chr10 | 15237001  | 15262865  | NMT2           | N-myristoyltransferase 2                                       | 36623.424      |
| 666  | chr20 | 10330777  | 10358238  | MKKS           | McKusick-Kaufman syndrome                                      | 36597.2747     |
| 667  | chr1  | 157962070 | 157991455 | KIRREL         | kin of IRRE like (Drosophila)                                  | 36563.7555     |
| 668  | chr5  | 106800702 | 106814852 | EFNA5          | ephrin-A5                                                      | 36535.3        |
| 669  | chr2  | 231621362 | 231661962 | CAB39          | calcium binding protein 39                                     | 36491.28       |

| Rank | chr   | start     | end       | Gene         | Gene description                                          | H3K27ac signal |
|------|-------|-----------|-----------|--------------|-----------------------------------------------------------|----------------|
| 670  | chr9  | 91388493  | 91397760  | MIR4289      | microRNA 4289                                             | 36460.0848     |
| 671  | chr15 | 99431644  | 99468676  | IGF1R        | insulin like growth factor 1 receptor                     | 36380.2368     |
| 672  | chr21 | 45540579  | 45561900  | C21orf33     | chromosome 21 open reading frame 33                       | 36375.7581     |
| 673  | chr6  | 18361792  | 18409413  | RNF144B      | ring finger protein 144B                                  | 36372.9198     |
| 674  | chr5  | 148344105 | 148365045 | SH3TC2       | SH3 domain and tetratricopeptide repeats 2                | 36347.652      |
| 675  | chr6  | 132266906 | 132277675 | CTGF         | connective tissue growth factor                           | 36342.1443     |
| 676  | chr2  | 216261075 | 216304089 | FN1          | fibronectin 1                                             | 36299.5146     |
| 677  | chr4  | 8184172   | 8208567   | SH3TC1       | SH3 domain and tetratricopeptide repeats 1                | 36292.4415     |
| 678  | chr3  | 32439956  | 32465877  | CMTM7        | CKLF like MARVEL transmembrane domain containing 7        | 36266.0711     |
| 679  | chr5  | 32272579  | 32279044  | MTMR12       | myotubularin related protein 12                           | 36264.771      |
| 680  | chr3  | 170443413 | 170478626 | RPL22L1      | ribosomal protein L22 like 1                              | 36255.3048     |
| 681  | chr6  | 163755538 | 163790262 | DKFZp451B082 | uncharacterized LOC401282                                 | 36192.8252     |
| 682  | chr6  | 114175314 | 114183165 | MARCKS       | myristoylated alanine rich protein kinase C substrate     | 36091.047      |
| 683  | chr5  | 95192142  | 95207380  | LINC01554    | long intergenic non-protein coding RNA 1554               | 36077.4888     |
| 684  | chr1  | 156714463 | 156739339 | HDGF         | hepatoma-derived growth factor                            | 36040.3488     |
| 685  | chr15 | 89632849  | 89687934  | ABHD2        | abhydrolase domain containing 2                           | 36031.0985     |
| 686  | chr21 | 44895932  | 44919168  | LINC00313    | long intergenic non-protein coding RNA 313                | 36027.418      |
| 687  | chr17 | 75133362  | 75151827  | SEC14L1      | SEC14 like lipid binding 1                                | 35995.671      |
| 688  | chr6  | 74403674  | 74435543  | CD109        | CD109 molecule                                            | 35983.2879     |
| 689  | chr7  | 108042675 | 108097635 | NRCAM        | neuronal cell adhesion molecule                           | 35943.84       |
| 690  | chr5  | 59039102  | 59066226  | PDE4D        | phosphodiesterase 4D                                      | 35939.3        |
| 691  | chr2  | 169847646 | 169870771 | ABCB11       | ATP binding cassette subfamily B member 11                | 35859.9375     |
| 692  | chr10 | 114804459 | 114854425 | TCF7L2       | transcription factor 7 like 2                             | 35850.605      |
| 693  | chr7  | 111798628 | 111847952 | ZNF277       | zinc finger protein 277                                   | 35848.6832     |
| 694  | chr3  | 105069904 | 105089954 | ALCAM        | activated leukocyte cell adhesion molecule                | 35839.375      |
| 695  | chr2  | 191833915 | 191850641 | STAT1        | signal transducer and activator of transcription 1        | 35810.366      |
| 696  | chr22 | 43316939  | 43337750  | PACSIN2      | protein kinase C and casein kinase substrate in neurons 2 | 35713.7571     |
| 697  | chr20 | 19864864  | 19872345  | RIN2         | Ras and Rab interactor 2                                  | 35700.0801     |
| 698  | chr10 | 44341102  | 44364929  | LINC00840    | long intergenic non-protein coding RNA 840                | 35597.538      |
| 699  | chr15 | 90904797  | 90964446  | IQGAP1       | IQ motif containing GTPase activating protein 1           | 35586.5934     |
| 700  | chr14 | 63640432  | 63683445  | RHOJ         | ras homolog family member J                               | 35545.9432     |
| 701  | chr8  | 8186677   | 8222693   | SGK223       | homolog of rat pragma of Rnd2                             | 35540.5888     |
| 702  | chr3  | 11674239  | 11686447  | VGLL4        | vestigial like family member 4                            | 35537.488      |
| 703  | chr19 | 49375064  | 49380301  | PPP1R15A     | protein phosphatase 1 regulatory subunit 15A              | 35506.3363     |
| 704  | chr11 | 101781761 | 101787865 | ANGPTL5      | angiopoietin like 5                                       | 35504.5264     |
| 705  | chr3  | 129199688 | 129220316 | IFT122       | intraflagellar transport 122                              | 35473.9716     |
| 706  | chr2  | 206544825 | 206579157 | NRP2         | neuropilin 2                                              | 35410.0248     |
| 707  | chr12 | 76413064  | 76434074  | PHLDA1       | pleckstrin homology like domain family A member 1         | 35338.82       |
| 708  | chr10 | 82202296  | 82238765  | TSPAN14      | tetraspanin 14                                            | 35305.6389     |
| 709  | chr8  | 36998716  | 37006779  | KCNU1        | potassium calcium-activated channel subfamily U member 1  | 35302.2329     |
| 710  | chr14 | 61643482  | 61656707  | PRKCH        | protein kinase C eta                                      | 35193.0475     |
| 711  | chr15 | 57842076  | 57855285  | MYZAP        | myocardial zonula adherens protein                        | 35171.6043     |
| 712  | chr17 | 62392089  | 62410912  | PECAM1       | platelet/endothelial cell adhesion molecule 1             | 35159.4817     |
| 713  | chr7  | 107219602 | 107263790 | BCAP29       | B-cell receptor-associated protein 29                     | 35151.554      |
| 714  | chr3  | 191045181 | 191097926 | CCDC50       | coiled-coil domain containing 50                          | 35117.621      |

| Rank | chr   | start     | end       | Gene         | Gene description                                                          | H3K27ac signal |
|------|-------|-----------|-----------|--------------|---------------------------------------------------------------------------|----------------|
| 715  | chr14 | 51860021  | 51866506  | LINC00640    | long intergenic non-protein coding RNA 640                                | 35101.3595     |
| 716  | chr8  | 23000610  | 23039961  | TNFRSF10D    | tumor necrosis factor receptor superfamily member 10d                     | 34986.9741     |
| 717  | chr7  | 41225958  | 41231243  | SUGCT        | succinyl-CoA:glutarate-CoA transferase                                    | 34972.4305     |
| 718  | chr17 | 55944220  | 55972067  | CUEDC1       | CUE domain containing 1                                                   | 34967.4779     |
| 719  | chr5  | 176915939 | 176925995 | PDLIM7       | PDZ and LIM domain 7                                                      | 34958.6784     |
| 720  | chr11 | 57528249  | 57570724  | CTNND1       | catenin delta 1                                                           | 34922.945      |
| 721  | chr1  | 22089321  | 22111221  | USP48        | ubiquitin specific peptidase 48                                           | 34821          |
| 722  | chr8  | 22452294  | 22459781  | C8orf58      | chromosome 8 open reading frame 58                                        | 34817.5448     |
| 723  | chr22 | 37940992  | 37962201  | CDC42EP1     | CDC42 effector protein 1                                                  | 34806.0899     |
| 724  | chr6  | 32162032  | 32167049  | NOTCH4       | notch 4                                                                   | 34791.8916     |
| 725  | chr2  | 43132807  | 43157673  | HAAO         | 3-hydroxyanthranilate 3,4-dioxygenase                                     | 34775.101      |
| 726  | chr11 | 76287442  | 76301207  | EMSY         | EMSY, BRCA2 interacting transcriptional repressor                         | 34766.2605     |
| 727  | chr5  | 131628047 | 131633648 | SLC22A4      | solute carrier family 22 member 4                                         | 34746.9237     |
| 728  | chr11 | 19726620  | 19746419  | LOC100126784 | uncharacterized LOC100126784                                              | 34693.7877     |
| 729  | chr14 | 91573803  | 91586814  | C14orf159    | chromosome 14 open reading frame 159                                      | 34670.4117     |
| 730  | chr17 | 26660262  | 26676349  | TNFAIP1      | TNF alpha induced protein 1                                               | 34656.2241     |
| 731  | chr18 | 20836566  | 20863493  | TMEM241      | transmembrane protein 241                                                 | 34655.049      |
| 732  | chr5  | 55461898  | 55510615  | ANKRD55      | ankyrin repeat domain 55                                                  | 34652.4021     |
| 733  | chr5  | 43033287  | 43043719  | LOC153684    | uncharacterized LOC153684                                                 | 34644.672      |
| 734  | chr19 | 18473960  | 18501035  | MIR3189      | microRNA 3189                                                             | 34588.3125     |
| 735  | chr2  | 192695705 | 192744828 | SDPR         | serum deprivation response                                                | 34533.469      |
| 736  | chr2  | 202558524 | 202574002 | MPP4         | membrane protein, palmitoylated 4                                         | 34475.6972     |
| 737  | chr16 | 2201404   | 2222826   | SNORD60      | small nucleolar RNA, C/D box 60                                           | 34450.8604     |
| 738  | chr10 | 4805114   | 4824922   | AKR1E2       | aldo-keto reductase family 1, member E2                                   | 34418.3808     |
| 739  | chr1  | 39844584  | 39878154  | KIAA0754     | KIAA0754                                                                  | 34389.108      |
| 740  | chr8  | 59729023  | 59793441  | NSMAF        | neutral sphingomyelinase activation associated factor                     | 34386.3284     |
| 741  | chr4  | 7956808   | 7974763   | ABLIM2       | actin binding LIM protein family member 2                                 | 34373.052      |
| 742  | chr15 | 71566007  | 71589810  | THSD4        | thrombospondin type 1 domain containing 4                                 | 34354.8699     |
| 743  | chr3  | 30551398  | 30592399  | TGFBR2       | transforming growth factor beta receptor II                               | 34305.5367     |
| 744  | chr11 | 10312641  | 10352480  | ADM          | adrenomedullin                                                            | 34269.5078     |
| 745  | chr17 | 1615175   | 1622438   | WDR81        | WD repeat domain 81                                                       | 34204.3722     |
| 746  | chr19 | 48745076  | 48764191  | CARD8-AS1    | CARD8 antisense RNA 1                                                     | 34183.3545     |
| 747  | chr1  | 113159593 | 113181131 | ST7L         | suppression of tumorigenicity 7 like                                      | 34182.9598     |
| 748  | chr3  | 101848372 | 101901316 | ZPLD1        | zona pellucida-like domain containing 1                                   | 34170.0576     |
| 749  | chr18 | 77243605  | 77269153  | NFATC1       | nuclear factor of activated T-cells, cytoplasmic, calcineurin-dependent 1 | 34050.3744     |
| 750  | chr1  | 16159402  | 16179284  | SPEN         | spen family transcriptional repressor                                     | 34049.9132     |
| 751  | chr3  | 120134545 | 120170855 | FSTL1        | follistatin like 1                                                        | 33957.112      |
| 752  | chr7  | 48123676  | 48139344  | UPP1         | uridine phosphorylase 1                                                   | 33954.1228     |
| 753  | chr5  | 148824693 | 148845462 | MIR143       | microRNA 143                                                              | 33953.1612     |
| 754  | chr6  | 26203027  | 26208300  | HIST1H4E     | histone cluster 1, H4e                                                    | 33911.1903     |
| 755  | chr15 | 91411734  | 91430330  | FES          | FES proto-oncogene, tyrosine kinase                                       | 33852.1584     |
| 756  | chr11 | 95939449  | 95997914  | MIR1260B     | microRNA 1260b                                                            | 33845.3885     |
| 757  | chr13 | 99532268  | 99581959  | DOCK9        | dedicator of cytokinesis 9                                                | 33814.7255     |
| 758  | chr3  | 9433391   | 9444963   | THUMP3-AS1   | THUMP3 antisense RNA 1                                                    | 33764.7816     |
| 759  | chr12 | 122230554 | 122245307 | SETD1B       | SET domain containing 1B                                                  | 33757.8146     |

| Rank | chr   | start     | end       | Gene        | Gene description                                                          | H3K27ac signal |
|------|-------|-----------|-----------|-------------|---------------------------------------------------------------------------|----------------|
| 760  | chr12 | 76369500  | 76393387  | PHLDA1      | pleckstrin homology like domain family A member 1                         | 33735.6101     |
| 761  | chr3  | 134190041 | 134207139 | ANAPC13     | anaphase promoting complex subunit 13                                     | 33664.2522     |
| 762  | chr17 | 80801535  | 80845650  | ZNF750      | zinc finger protein 750                                                   | 33606.807      |
| 763  | chr12 | 123353922 | 123381501 | VPS37B      | VPS37B, ESCRT-I subunit                                                   | 33591.222      |
| 764  | chr5  | 143541531 | 143572636 | KCTD16      | potassium channel tetramerization domain containing 16                    | 33559.1845     |
| 765  | chr11 | 119184732 | 119194510 | MCAM        | melanoma cell adhesion molecule                                           | 33534.6288     |
| 766  | chr11 | 93860686  | 93886826  | PANX1       | pannexin 1                                                                | 33519.322      |
| 767  | chr1  | 59277806  | 59290178  | LINC01135   | long intergenic non-protein coding RNA 1135                               | 33491.004      |
| 768  | chr20 | 32374212  | 32403291  | CHMP4B      | charged multivesicular body protein 4B                                    | 33469.929      |
| 769  | chr2  | 105940383 | 105956133 | C2orf49     | chromosome 2 open reading frame 49                                        | 33419.925      |
| 770  | chr2  | 109780045 | 109803355 | MIR4265     | microRNA 4265                                                             | 33405.561      |
| 771  | chr20 | 50240016  | 50249752  | NFATC2      | nuclear factor of activated T-cells, cytoplasmic, calcineurin-dependent 2 | 33396.4272     |
| 772  | chr16 | 86851567  | 86872241  | FOXL1       | forkhead box L1                                                           | 33394.7122     |
| 773  | chr10 | 86054160  | 86074705  | CCSER2      | coiled-coil serine rich protein 2                                         | 33346.5895     |
| 774  | chr7  | 141349034 | 141377140 | KIAA1147    | KIAA1147                                                                  | 33299.9888     |
| 775  | chr3  | 99577330  | 99646009  | FILIP1L     | filamin A interacting protein 1-like                                      | 33281.8434     |
| 776  | chr9  | 14308527  | 14324168  | NFIB        | nuclear factor I/B                                                        | 33280.9198     |
| 777  | chr8  | 67433287  | 67449788  | C8orf46     | chromosome 8 open reading frame 46                                        | 33275.9166     |
| 778  | chr19 | 41220174  | 41228905  | ADCK4       | aarF domain containing kinase 4                                           | 33271.2217     |
| 779  | chr10 | 71560808  | 71631314  | COL13A1     | collagen type XIII alpha 1                                                | 33243.579      |
| 780  | chr12 | 66318181  | 66358000  | HMGA2       | high mobility group AT-hook 2                                             | 33145.3356     |
| 781  | chr2  | 216555908 | 216594850 | LINC00607   | long intergenic non-protein coding RNA 607                                | 33143.5362     |
| 782  | chr12 | 10168306  | 10195644  | CLEC9A      | C-type lectin domain family 9 member A                                    | 33117.2532     |
| 783  | chr6  | 142617695 | 142665657 | ADGRG6      | adhesion G protein-coupled receptor G6                                    | 33112.9648     |
| 784  | chr3  | 194297945 | 194315698 | TMEM44-AS1  | TMEM44 antisense RNA 1                                                    | 33109.345      |
| 785  | chr11 | 65678259  | 65688266  | DRAP1       | DR1 associated protein 1                                                  | 33105.1574     |
| 786  | chr16 | 87397076  | 87443486  | FBXO31      | F-box protein 31                                                          | 33099.612      |
| 787  | chr14 | 38718547  | 38728269  | CLEC14A     | C-type lectin domain family 14 member A                                   | 33088.827      |
| 788  | chr7  | 23371703  | 23419064  | IGF2BP3     | insulin like growth factor 2 mRNA binding protein 3                       | 33086.3946     |
| 789  | chr5  | 66123699  | 66158132  | MAST4       | microtubule associated serine/threonine kinase family member 4            | 33041.9068     |
| 790  | chr6  | 21726111  | 21774018  | CASC15      | cancer susceptibility candidate 15 (non-protein coding)                   | 33031.8765     |
| 791  | chr13 | 113363965 | 113378398 | ATP11A      | ATPase phospholipid transporting 11A                                      | 33016.9308     |
| 792  | chr1  | 205565556 | 205581814 | MFSD4A      | major facilitator superfamily domain containing 4A                        | 32984.2304     |
| 793  | chr10 | 33226337  | 33252978  | ITGB1       | integrin subunit beta 1                                                   | 32970.9016     |
| 794  | chr15 | 90337697  | 90395919  | MIR5094     | microRNA 5094                                                             | 32930.3632     |
| 795  | chr17 | 4402305   | 4442011   | SPNS2       | spinster homolog 2 (Drosophila)                                           | 32908.3328     |
| 796  | chr16 | 53105210  | 53135206  | CHD9        | chromodomain helicase DNA binding protein 9                               | 32893.6136     |
| 797  | chr2  | 27993620  | 28034446  | MRPL33      | mitochondrial ribosomal protein L33                                       | 32889.4256     |
| 798  | chr11 | 126204366 | 126226969 | ST3GAL4-AS1 | ST3GAL4 antisense RNA 1 (head to head)                                    | 32869.2826     |
| 799  | chr3  | 187453562 | 187464459 | BCL6        | B-cell CLL/lymphoma 6                                                     | 32844.6477     |
| 800  | chr16 | 75321500  | 75357754  | BCAR1       | breast cancer anti-estrogen resistance 1                                  | 32795.3684     |
| 801  | chr14 | 24886739  | 24909521  | KHNYN       | KH and NYN domain containing                                              | 32783.298      |
| 802  | chr18 | 53165228  | 53185115  | TCF4        | transcription factor 4                                                    | 32741.9568     |
| 803  | chr15 | 78325837  | 78370609  | TBC1D2B     | TBC1 domain family member 2B                                              | 32732.8092     |
| 804  | chr11 | 9633484   | 9650154   | SWAP70      | SWAP switching B-cell complex 70kDa subunit                               | 32678.201      |

| Rank | chr   | start     | end       | Gene      | Gene description                                                           | H3K27ac signal |
|------|-------|-----------|-----------|-----------|----------------------------------------------------------------------------|----------------|
| 805  | chr19 | 40922264  | 40951420  | SERTAD3   | SERTA domain containing 3                                                  | 32637.2264     |
| 806  | chr9  | 112849466 | 112916920 | AKAP2     | A-kinase anchoring protein 2                                               | 32566.7912     |
| 807  | chr9  | 84002460  | 84006826  | TLE1      | transducin like enhancer of split 1                                        | 32533.249      |
| 808  | chr9  | 91924125  | 91935890  | MIR3153   | microRNA 3153                                                              | 32531.4015     |
| 809  | chr13 | 31437580  | 31452348  | MEDAG     | mesenteric estrogen-dependent adipogenesis                                 | 32485.1696     |
| 810  | chr2  | 136992354 | 137001490 | CXCR4     | chemokine (C-X-C motif) receptor 4                                         | 32476.6528     |
| 811  | chr8  | 42109356  | 42159062  | IKBKB     | inhibitor of kappa light polypeptide gene enhancer in B-cells, kinase beta | 32418.2532     |
| 812  | chrX  | 12964454  | 13004127  | TMSB4X    | thymosin beta 4, X-linked                                                  | 32412.841      |
| 813  | chr11 | 75016703  | 75064229  | ARRB1     | arrestin, beta 1                                                           | 32407.9794     |
| 814  | chr3  | 129105748 | 129119309 | RPL32P3   | ribosomal protein L32 pseudogene 3                                         | 32387.7363     |
| 815  | chr16 | 1581792   | 1600264   | TMEM204   | transmembrane protein 204                                                  | 32374.0272     |
| 816  | chr4  | 103729887 | 103751180 | UBE2D3    | ubiquitin conjugating enzyme E2D 3                                         | 32371.7479     |
| 817  | chr2  | 113381328 | 113407385 | FLJ42351  | uncharacterized LOC400999                                                  | 32341.9484     |
| 818  | chr4  | 54925218  | 54952382  | CHIC2     | cysteine rich hydrophobic domain 2                                         | 32227.3696     |
| 819  | chr20 | 46906636  | 46928808  | LINC00494 | long intergenic non-protein coding RNA 494                                 | 32158.2688     |
| 820  | chr1  | 154451768 | 154475583 | TDRD10    | tudor domain containing 10                                                 | 32107.383      |
| 821  | chr3  | 69057260  | 69064279  | EOGT      | EGF domain-specific O-linked N-acetylglucosamine (GlcNAc) transferase      | 32042.4369     |
| 822  | chr2  | 150982018 | 151002933 | RND3      | Rho family GTPase 3                                                        | 32010.4075     |
| 823  | chr11 | 65414253  | 65431995  | MIR4489   | microRNA 4489                                                              | 31974.6324     |
| 824  | chr1  | 23064479  | 23083980  | MIR4684   | microRNA 4684                                                              | 31960.1889     |
| 825  | chr18 | 59267545  | 59277462  | CDH20     | cadherin 20                                                                | 31954.5574     |
| 826  | chr6  | 21586690  | 21599986  | SOX4      | SRY-box 4                                                                  | 31897.104      |
| 827  | chr15 | 75320325  | 75341381  | PPCDC     | phosphopantothenoylcysteine decarboxylase                                  | 31893.5232     |
| 828  | chr9  | 33800419  | 33821432  | UBE2R2    | ubiquitin conjugating enzyme E2R 2                                         | 31889.3288     |
| 829  | chr20 | 349096    | 363936    | TRIB3     | tribbles pseudokinase 3                                                    | 31876.32       |
| 830  | chr10 | 16985697  | 17012619  | CUBN      | cubilin                                                                    | 31867.5714     |
| 831  | chr19 | 780709    | 803768    | PTBP1     | polypyrimidine tract binding protein 1                                     | 31862.9262     |
| 832  | chr7  | 22755972  | 22770958  | IL6       | interleukin 6                                                              | 31861.7346     |
| 833  | chr19 | 2461021   | 2508526   | GADD45B   | growth arrest and DNA damage inducible beta                                | 31799.847      |
| 834  | chr7  | 143075296 | 143091201 | ZYX       | zyxin                                                                      | 31786.1425     |
| 835  | chr3  | 194748841 | 194755276 | XXYL1     | xyloside xylosyltransferase 1                                              | 31750.9335     |
| 836  | chr6  | 30646517  | 30659753  | NRM       | nurim (nuclear envelope membrane protein)                                  | 31697.5728     |
| 837  | chr15 | 95866794  | 95874474  | LINC01197 | long intergenic non-protein coding RNA 1197                                | 31683.84       |
| 838  | chr13 | 29014019  | 29070474  | FLT1      | fms related tyrosine kinase 1                                              | 31682.546      |
| 839  | chr13 | 30086710  | 30140562  | MTUS2     | microtubule associated tumor suppressor candidate 2                        | 31659.5908     |
| 840  | chr5  | 173190446 | 173210698 | CPEB4     | cytoplasmic polyadenylation element binding protein 4                      | 31657.9264     |
| 841  | chr11 | 122026517 | 122074151 | MIR100HG  | mir-100-let-7a-2 cluster host gene                                         | 31581.342      |
| 842  | chr3  | 99260678  | 99298856  | COL8A1    | collagen type VIII alpha 1                                                 | 31542.6636     |
| 843  | chr21 | 36246930  | 36262924  | RUNX1     | runt related transcription factor 1                                        | 31498.5836     |
| 844  | chr20 | 39764833  | 39782062  | PLCG1     | phospholipase C gamma 1                                                    | 31494.612      |
| 845  | chr19 | 3655118   | 3685635   | PIP5K1C   | phosphatidylinositol-4-phosphate 5-kinase, type I, gamma                   | 31490.4923     |
| 846  | chr1  | 218632189 | 218673693 | TGFB2-AS1 | TGFB2 antisense RNA 1 (head to head)                                       | 31484.9344     |
| 847  | chr7  | 134343786 | 134357768 | BPGM      | bisphosphoglycerate mutase                                                 | 31448.3144     |
| 848  | chr5  | 14034146  | 14040417  | DNAH5     | dynein axonemal heavy chain 5                                              | 31430.8791     |
| 849  | chr18 | 20031688  | 20052817  | CTAGE1    | cutaneous T-cell lymphoma-associated antigen 1                             | 31429.3875     |

| Rank | chr   | start     | end       | Gene       | Gene description                                                   | H3K27ac signal |
|------|-------|-----------|-----------|------------|--------------------------------------------------------------------|----------------|
| 850  | chr22 | 27501281  | 27513974  | MIAT       | myocardial infarction associated transcript (non-protein coding)   | 31426.5987     |
| 851  | chr20 | 43269931  | 43275978  | ADA        | adenosine deaminase                                                | 31334.9493     |
| 852  | chr6  | 26019607  | 26029275  | HIST1H3A   | histone cluster 1, H3a                                             | 31326.2536     |
| 853  | chr14 | 100824738 | 100853577 | WARS       | tryptophanyl-tRNA synthetase                                       | 31316.2701     |
| 854  | chr18 | 47185467  | 47228859  | LIPG       | lipase G, endothelial type                                         | 31289.9712     |
| 855  | chr14 | 23316822  | 23323227  | MMP14      | matrix metalloproteinase 14                                        | 31248.0735     |
| 856  | chr8  | 38236897  | 38245107  | LETM2      | leucine zipper and EF-hand containing transmembrane protein 2      | 31149.561      |
| 857  | chr13 | 31469209  | 31483673  | MEDAG      | mesenteric estrogen-dependent adipogenesis                         | 31106.2784     |
| 858  | chr3  | 187974205 | 188017014 | LPP        | LIM domain containing preferred translocation partner in lipoma    | 31096.4576     |
| 859  | chr3  | 152031952 | 152078765 | TMEM14EP   | transmembrane protein 14E, pseudogene                              | 31074.4694     |
| 860  | chr4  | 55794250  | 55812907  | KDR        | kinase insert domain receptor                                      | 31035.9195     |
| 861  | chr13 | 34726279  | 34738009  | RFC3       | replication factor C subunit 3                                     | 31034.061      |
| 862  | chr12 | 13050692  | 13081202  | MIR614     | microRNA 614                                                       | 31019.517      |
| 863  | chr17 | 46300657  | 46324790  | MIR1203    | microRNA 1203                                                      | 31010.905      |
| 864  | chr2  | 70311904  | 70323619  | PCBP1-AS1  | PCBP1 antisense RNA 1                                              | 31003.7475     |
| 865  | chr5  | 148922409 | 148944942 | CSNK1A1    | casein kinase 1 alpha 1                                            | 30973.8618     |
| 866  | chr4  | 74958117  | 74984482  | CXCL2      | C-X-C motif chemokine ligand 2                                     | 30970.9655     |
| 867  | chr19 | 4557340   | 4577795   | SEMA6B     | semaphorin 6B                                                      | 30954.5515     |
| 868  | chr2  | 203237672 | 203245509 | BMPR2      | bone morphogenetic protein receptor type II                        | 30949.8804     |
| 869  | chr4  | 139140752 | 139165259 | SLC7A11    | solute carrier family 7 member 11                                  | 30937.6368     |
| 870  | chr19 | 34755273  | 34767071  | KIAA0355   | KIAA0355                                                           | 30934.356      |
| 871  | chr1  | 201503948 | 201532721 | RPS10P7    | ribosomal protein S10 pseudogene 7                                 | 30922.3431     |
| 872  | chr7  | 22149085  | 22170660  | RAPGEF5    | Rap guanine nucleotide exchange factor 5                           | 30904.03       |
| 873  | chr5  | 42944147  | 42954451  | LOC648987  | uncharacterized LOC648987                                          | 30883.1488     |
| 874  | chr9  | 134268320 | 134313669 | PRRC2B     | proline rich coiled-coil 2B                                        | 30869.0643     |
| 875  | chr12 | 31867431  | 31904691  | AMN1       | antagonist of mitotic exit network 1 homolog                       | 30847.554      |
| 876  | chr17 | 6913463   | 6922411   | ALOX12-AS1 | ALOX12 antisense RNA 1                                             | 30834.808      |
| 877  | chr13 | 45491016  | 45510462  | NUFIP1     | nuclear fragile X mental retardation protein interacting protein 1 | 30804.4086     |
| 878  | chr17 | 21185148  | 21194371  | MAP2K3     | mitogen-activated protein kinase kinase 3                          | 30778.9956     |
| 879  | chr16 | 3069845   | 3074828   | TNFRSF12A  | tumor necrosis factor receptor superfamily member 12A              | 30761.5539     |
| 880  | chr6  | 11314793  | 11320502  | NEDD9      | neural precursor cell expressed, developmentally down-regulated 9  | 30749.8158     |
| 881  | chr1  | 16120119  | 16127909  | UQCRHL     | ubiquinol-cytochrome c reductase hinge protein like                | 30736.224      |
| 882  | chr3  | 69222027  | 69264209  | FRMD4B     | FERM domain containing 4B                                          | 30721.1506     |
| 883  | chr3  | 49376199  | 49397938  | GPX1       | glutathione peroxidase 1                                           | 30712.8592     |
| 884  | chr5  | 141692440 | 141706855 | SPRY4      | sprouty RTK signaling antagonist 4                                 | 30673.6785     |
| 885  | chr16 | 15107268  | 15157004  | NTAN1      | N-terminal asparagine amidase                                      | 30617.4816     |
| 886  | chr8  | 119067375 | 119126218 | EXT1       | exostosin glycosyltransferase 1                                    | 30586.5914     |
| 887  | chr20 | 60929675  | 60958035  | LAMA5      | laminin subunit alpha 5                                            | 30557.9        |
| 888  | chr12 | 122879185 | 122908878 | CLIP1-AS1  | CLIP1 antisense RNA 1                                              | 30530.3426     |
| 889  | chr20 | 52506728  | 52567222  | SUMO1P1    | SUMO1 pseudogene 1                                                 | 30519.223      |
| 890  | chr11 | 96035220  | 96049448  | MIR1260B   | microRNA 1260b                                                     | 30497.718      |
| 891  | chr5  | 54275388  | 54303198  | ESM1       | endothelial cell specific molecule 1                               | 30446.388      |
| 892  | chr10 | 31099770  | 31111333  | ZNF438     | zinc finger protein 438                                            | 30428.0345     |
| 893  | chr1  | 72746308  | 72753422  | NEGR1      | neuronal growth regulator 1                                        | 30418.7526     |
| 894  | chr6  | 157921035 | 157958550 | MIR3692    | microRNA 3692                                                      | 30409.659      |

| Rank | chr   | start     | end       | Gene      | Gene description                                                 | H3K27ac signal |
|------|-------|-----------|-----------|-----------|------------------------------------------------------------------|----------------|
| 895  | chr21 | 30534434  | 30592865  | LINC00189 | long intergenic non-protein coding RNA 189                       | 30349.0614     |
| 896  | chr8  | 131489679 | 131542160 | ASAP1     | ArfGAP with SH3 domain, ankyrin repeat and PH domain 1           | 30344.5142     |
| 897  | chr16 | 19118465  | 19144771  | ITPRIPL2  | inositol 1,4,5-trisphosphate receptor interacting protein-like 2 | 30296.6202     |
| 898  | chr13 | 42162162  | 42190758  | MIR5006   | microRNA 5006                                                    | 30277.4448     |
| 899  | chr18 | 53052938  | 53090760  | TCF4      | transcription factor 4                                           | 30246.2534     |
| 900  | chr14 | 69542946  | 69569128  | DCAF5     | DDB1 and CUL4 associated factor 5                                | 30219.2644     |
| 901  | chr17 | 71286487  | 71309200  | CDC42EP4  | CDC42 effector protein 4                                         | 30201.4761     |
| 902  | chr5  | 56728928  | 56748497  | ACTBL2    | actin, beta-like 2                                               | 30149.9583     |
| 903  | chr10 | 73595271  | 73649750  | ANAPC16   | anaphase promoting complex subunit 16                            | 30148.6786     |
| 904  | chr3  | 11313460  | 11349694  | ATG7      | autophagy related 7                                              | 30117.7008     |
| 905  | chr8  | 38643554  | 38666290  | TACC1     | transforming acidic coiled-coil containing protein 1             | 30107.0112     |
| 906  | chr2  | 219146685 | 219163535 | TMBIM1    | transmembrane BAX inhibitor motif containing 1                   | 30075.565      |
| 907  | chrX  | 9968923   | 9992390   | WWC3      | WWC family member 3                                              | 30058.8803     |
| 908  | chr10 | 17090606  | 17127859  | CUBN      | cubilin                                                          | 30014.7421     |
| 909  | chr3  | 149047813 | 149062038 | TM4SF18   | transmembrane 4 L six family member 18                           | 30011.905      |
| 910  | chr1  | 173158044 | 173177356 | TNFSF4    | tumor necrosis factor superfamily member 4                       | 30010.848      |
| 911  | chr5  | 88108952  | 88133571  | MEF2C     | myocyte enhancer factor 2C                                       | 29978.5563     |
| 912  | chr10 | 80731404  | 80736477  | ZMIZ1-AS1 | ZMIZ1 antisense RNA 1                                            | 29971.7913     |
| 913  | chr10 | 1088232   | 1111934   | WDR37     | WD repeat domain 37                                              | 29907.1836     |
| 914  | chr14 | 34024761  | 34040868  | NPAS3     | neuronal PAS domain protein 3                                    | 29833.3854     |
| 915  | chr14 | 91260745  | 91273141  | TTC7B     | tetratricopeptide repeat domain 7B                               | 29811.1404     |
| 916  | chr16 | 75372935  | 75387145  | BCAR1     | breast cancer anti-estrogen resistance 1                         | 29801.212      |
| 917  | chr1  | 32389209  | 32422735  | PTP4A2    | protein tyrosine phosphatase type IVA, member 2                  | 29757.6776     |



**Online Table VI: Super-enhancers identified by enrichment of ERG in HUVEC.** Ordered by super-enhancer ranking. Chromosome (chr), start and end indicates genomic position on the GRCh37/hg19 assembly. Super-enhancer-associated gene symbols and description are indicated. ERG signal is ChIP-seq read density times length of stitched enhancer. This table spans 26 pages.

| Rank | chr   | start     | end       | Gene         | Gene description                                                           | ERG signal |
|------|-------|-----------|-----------|--------------|----------------------------------------------------------------------------|------------|
| 1    | chr12 | 6150598   | 6345991   | VWF          | von Willebrand factor                                                      | 27237.7842 |
| 2    | chr2  | 36579345  | 36731285  | LOC100288911 | uncharacterized LOC100288911                                               | 24462.34   |
| 3    | chr1  | 68129344  | 68281895  | GADD45A      | growth arrest and DNA damage inducible alpha                               | 21524.9461 |
| 4    | chr4  | 7779369   | 7921553   | AFAP1        | actin filament associated protein 1                                        | 18896.2536 |
| 5    | chr3  | 149242874 | 149379253 | WWTR1-AS1    | WWTR1 antisense RNA 1                                                      | 18820.302  |
| 6    | chr3  | 194817758 | 194946736 | XXYLT1-AS2   | XXYLT1 antisense RNA 2                                                     | 18701.81   |
| 7    | chr15 | 67356712  | 67473258  | SMAD3        | SMAD family member 3                                                       | 17948.084  |
| 8    | chr3  | 171474760 | 171595496 | TMEM212      | transmembrane protein 212                                                  | 17736.1184 |
| 9    | chr8  | 128842258 | 128964124 | PVT1         | Pvt1 oncogene (non-protein coding)                                         | 17158.7328 |
| 10   | chr20 | 36700423  | 36802692  | TGM2         | transglutaminase 2                                                         | 16751.6622 |
| 11   | chr3  | 57990579  | 58107732  | FLNB         | filamin B                                                                  | 15768.7938 |
| 12   | chr3  | 30645151  | 30748081  | TGFBR2       | transforming growth factor beta receptor 2                                 | 15758.583  |
| 13   | chr1  | 172851335 | 172961123 | TNFSF18      | tumor necrosis factor superfamily member 18                                | 14019.9276 |
| 14   | chr6  | 148683214 | 148788098 | SASH1        | SAM and SH3 domain containing 1                                            | 13802.7344 |
| 15   | chr1  | 39567767  | 39680972  | MACF1        | microtubule-actin crosslinking factor 1                                    | 13629.882  |
| 16   | chr21 | 27256073  | 27360856  | APP          | amyloid beta precursor protein                                             | 13579.8768 |
| 17   | chr5  | 14141967  | 14238765  | TRIO         | trio Rho guanine nucleotide exchange factor                                | 13503.321  |
| 18   | chr13 | 97873415  | 97962677  | MBNL2        | muscleblind like splicing regulator 2                                      | 13469.6358 |
| 19   | chr4  | 41121390  | 41220028  | APBB2        | amyloid beta precursor protein binding family B member 2                   | 13375.3128 |
| 20   | chr22 | 36709337  | 36796144  | MYH9         | myosin heavy chain 9                                                       | 13290.1517 |
| 21   | chr6  | 52353440  | 52443435  | TRAM2-AS1    | TRAM2 antisense RNA 1 (head to head)                                       | 13247.264  |
| 22   | chr9  | 116339406 | 116421278 | RGS3         | regulator of G-protein signaling 3                                         | 13173.2048 |
| 23   | chr20 | 49086817  | 49191105  | PTPN1        | protein tyrosine phosphatase, non-receptor type 1                          | 12816.9952 |
| 24   | chr17 | 62604109  | 62746017  | SMURF2       | SMAD specific E3 ubiquitin protein ligase 2                                | 12800.1016 |
| 25   | chr2  | 9340401   | 9430319   | ASAP2        | ArfGAP with SH3 domain, ankyrin repeat and PH domain 2                     | 12624.4872 |
| 26   | chr1  | 94642448  | 94732671  | ARHGAP29     | Rho GTPase activating protein 29                                           | 12378.5956 |
| 27   | chr12 | 96753048  | 96844725  | CDK17        | cyclin dependent kinase 17                                                 | 12339.7242 |
| 28   | chr8  | 68853654  | 68944316  | PREX2        | phosphatidylinositol-3,4,5-trisphosphate dependent Rac exchange factor 2   | 12248.4362 |
| 29   | chr5  | 71736476  | 71820549  | ZNF366       | zinc finger protein 366                                                    | 12140.1412 |
| 30   | chr1  | 22219550  | 22302670  | HSPG2        | heparan sulfate proteoglycan 2                                             | 12093.96   |
| 31   | chr11 | 12177950  | 12263570  | MICAL2       | microtubule associated monooxygenase, calponin and LIM domain containing 2 | 12063.858  |
| 32   | chr6  | 129943794 | 130032337 | ARHGAP18     | Rho GTPase activating protein 18                                           | 12024.1394 |
| 33   | chr10 | 101663548 | 101770893 | DNMBP-AS1    | DNMBP antisense RNA 1                                                      | 11990.4365 |
| 34   | chr21 | 39806397  | 39879807  | ERG          | ERG, ETS transcription factor                                              | 11811.669  |
| 35   | chr11 | 86258599  | 86345784  | ME3          | malic enzyme 3                                                             | 11735.101  |
| 36   | chr9  | 14170062  | 14252321  | NFIB         | nuclear factor I B                                                         | 11614.9708 |
| 37   | chr4  | 86681232  | 86766007  | ARHGAP24     | Rho GTPase activating protein 24                                           | 11503.9675 |
| 38   | chr12 | 96586107  | 96659334  | ELK3         | ELK3, ETS transcription factor                                             | 11496.639  |
| 39   | chr7  | 75920179  | 76023287  | SSC4D        | scavenger receptor cysteine rich family member with 4 domains              | 11434.6772 |

| Rank | chr   | start     | end       | Gene        | Gene description                                                                                     | ERG signal |
|------|-------|-----------|-----------|-------------|------------------------------------------------------------------------------------------------------|------------|
| 40   | chr1  | 85762318  | 85834616  | BCL10       | B-cell CLL/lymphoma 10                                                                               | 11177.2708 |
| 41   | chr2  | 46523336  | 46595382  | EPAS1       | endothelial PAS domain protein 1                                                                     | 10979.8104 |
| 42   | chr12 | 70989165  | 71066393  | PTPRB       | protein tyrosine phosphatase, receptor type B                                                        | 10927.762  |
| 43   | chr10 | 13850061  | 13937676  | FRMD4A      | FERM domain containing 4A                                                                            | 10908.0675 |
| 44   | chr14 | 55087612  | 55159666  | SAMD4A      | sterile alpha motif domain containing 4A                                                             | 10793.6892 |
| 45   | chr10 | 14587123  | 14660254  | FAM107B     | family with sequence similarity 107 member B                                                         | 10567.4295 |
| 46   | chr3  | 129294413 | 129347691 | PLXND1      | plexin D1                                                                                            | 10565.0274 |
| 47   | chr1  | 223885566 | 223965818 | CAPN2       | calpain 2                                                                                            | 10496.9616 |
| 48   | chr2  | 54772239  | 54842985  | SPTBN1      | spectrin beta, non-erythrocytic 1                                                                    | 10491.6318 |
| 49   | chr2  | 238580987 | 238654797 | LRRFIP1     | LRR binding FLII interacting protein 1                                                               | 10473.639  |
| 50   | chr10 | 33501796  | 33577318  | NRP1        | neuropilin 1                                                                                         | 10467.3492 |
| 51   | chr12 | 66216228  | 66289670  | RPSAP52     | ribosomal protein SA pseudogene 52                                                                   | 10340.6336 |
| 52   | chr10 | 71560808  | 71631314  | COL13A1     | collagen type XIII alpha 1 chain                                                                     | 10202.2182 |
| 53   | chr10 | 95162521  | 95242935  | MYOF        | myoferlin                                                                                            | 10196.4952 |
| 54   | chr15 | 66992522  | 67068022  | SMAD6       | SMAD family member 6                                                                                 | 10184.95   |
| 55   | chr5  | 60558584  | 60631810  | ZSWIM6      | zinc finger SWIM-type containing 6                                                                   | 10149.1236 |
| 56   | chr10 | 104354881 | 104418662 | SUFU        | SUFU negative regulator of hedgehog signaling                                                        | 10134.8009 |
| 57   | chr12 | 111833864 | 111887883 | SH2B3       | SH2B adaptor protein 3                                                                               | 10112.3568 |
| 58   | chr14 | 61763760  | 61834459  | PRKCH       | protein kinase C eta                                                                                 | 10060.4677 |
| 59   | chr7  | 27168902  | 27221257  | HOXA-AS3    | HOXA cluster antisense RNA 3                                                                         | 10031.218  |
| 60   | chr11 | 128547516 | 128601295 | SENCR       | smooth muscle and endothelial cell enriched migration/differentiation-associated long non-coding RNA | 10024.4056 |
| 61   | chr9  | 38006679  | 38080219  | SHB         | SH2 domain containing adaptor protein B                                                              | 9986.732   |
| 62   | chr8  | 6384511   | 6460648   | ANGPT2      | angiopoietin 2                                                                                       | 9981.5607  |
| 63   | chr2  | 159885124 | 159958832 | TANC1       | tetratricopeptide repeat, ankyrin repeat and coiled-coil containing 1                                | 9862.1304  |
| 64   | chr6  | 158422671 | 158493989 | SYNJ2       | synaptojanin 2                                                                                       | 9834.7522  |
| 65   | chr18 | 55435265  | 55514768  | ATP8B1      | ATPase phospholipid transporting 8B1                                                                 | 9723.2169  |
| 66   | chr15 | 39520384  | 39595133  | C15orf54    | chromosome 15 open reading frame 54                                                                  | 9694.9453  |
| 67   | chr9  | 139536090 | 139569757 | MIR126      | microRNA 126                                                                                         | 9655.6956  |
| 68   | chr2  | 20761375  | 20819862  | HS1BP3      | HCLS1 binding protein 3                                                                              | 9586.0193  |
| 69   | chr21 | 33774813  | 33873638  | EVA1C       | eva-1 homolog C                                                                                      | 9516.8475  |
| 70   | chr2  | 201979149 | 202057923 | CFLAR-AS1   | CFLAR antisense RNA 1                                                                                | 9476.5122  |
| 71   | chr5  | 34654263  | 34720278  | RAI14       | retinoic acid induced 14                                                                             | 9440.145   |
| 72   | chr9  | 130587945 | 130645966 | MIR4672     | microRNA 4672                                                                                        | 9364.5894  |
| 73   | chr12 | 105820885 | 105884788 | C12orf75    | chromosome 12 open reading frame 75                                                                  | 9265.935   |
| 74   | chr12 | 46822728  | 46889054  | SLC38A2     | solute carrier family 38 member 2                                                                    | 9239.2118  |
| 75   | chr7  | 115953501 | 116019012 | CAV1        | caveolin 1                                                                                           | 9230.4999  |
| 76   | chr13 | 111022722 | 111096837 | COL4A2      | collagen type IV alpha 2 chain                                                                       | 9197.6715  |
| 77   | chr9  | 112849466 | 112916920 | AKAP2       | A-kinase anchoring protein 2                                                                         | 9193.9802  |
| 78   | chr3  | 111619534 | 111686992 | PHLDB2      | pleckstrin homology like domain family B member 2                                                    | 9160.7964  |
| 79   | chr20 | 23029205  | 23088549  | CD93        | CD93 molecule                                                                                        | 9115.2384  |
| 80   | chr7  | 107610897 | 107671816 | LAMB1       | laminin subunit beta 1                                                                               | 9083.0229  |
| 81   | chr3  | 11209877  | 11281478  | HRH1        | histamine receptor H1                                                                                | 9057.5265  |
| 82   | chr3  | 185394602 | 185465225 | IGF2BP2-AS1 | IGF2BP2 antisense RNA 1                                                                              | 9046.8063  |
| 83   | chr8  | 134531969 | 134597137 | ST3GAL1     | ST3 beta-galactoside alpha-2,3-sialyltransferase 1                                                   | 9025.768   |
| 84   | chr2  | 161225492 | 161291735 | MIR4785     | microRNA 4785                                                                                        | 9022.2966  |

| Rank | chr   | start     | end       | Gene         | Gene description                                                 | ERG signal |
|------|-------|-----------|-----------|--------------|------------------------------------------------------------------|------------|
| 85   | chr20 | 45931031  | 45991894  | LOC100131496 | uncharacterized LOC100131496                                     | 9019.8966  |
| 86   | chr15 | 60650645  | 60716895  | ANXA2        | annexin A2                                                       | 9010       |
| 87   | chr9  | 114764125 | 114847374 | MIR4668      | microRNA 4668                                                    | 8982.5671  |
| 88   | chr12 | 89737986  | 89786004  | DUSP6        | dual specificity phosphatase 6                                   | 8964.9606  |
| 89   | chr15 | 42209440  | 42265576  | EHD4         | EH domain containing 4                                           | 8852.6472  |
| 90   | chr20 | 30248993  | 30312218  | BCL2L1       | BCL2 like 1                                                      | 8813.565   |
| 91   | chr6  | 112522289 | 112576802 | LAMA4        | laminin subunit alpha 4                                          | 8792.9469  |
| 92   | chr3  | 157123850 | 157194827 | PTX3         | pentraxin 3                                                      | 8779.8549  |
| 93   | chr3  | 99577330  | 99646009  | FILIP1L      | filamin A interacting protein 1 like                             | 8729.1009  |
| 94   | chr5  | 52278788  | 52342057  | ITGA2        | integrin subunit alpha 2                                         | 8674.1799  |
| 95   | chr5  | 148667027 | 148730130 | AFAP1L1      | actin filament associated protein 1 like 1                       | 8651.4213  |
| 96   | chr5  | 172279904 | 172339762 | ERGIC1       | endoplasmic reticulum-golgi intermediate compartment 1           | 8583.6372  |
| 97   | chr1  | 94485752  | 94539432  | ABCA4        | ATP binding cassette subfamily A member 4                        | 8583.432   |
| 98   | chr22 | 23520612  | 23586038  | BCR          | BCR, RhoGEF and GTPase activating protein                        | 8557.7208  |
| 99   | chr7  | 116138951 | 116195548 | CAV1         | caveolin 1                                                       | 8551.8067  |
| 100  | chr8  | 59729023  | 59793441  | NSMAF        | neutral sphingomyelinase activation associated factor            | 8548.2686  |
| 101  | chr18 | 68647276  | 68716976  | LINC01541    | long intergenic non-protein coding RNA 1541                      | 8545.22    |
| 102  | chr22 | 39624933  | 39689626  | PDGFB        | platelet derived growth factor subunit B                         | 8474.783   |
| 103  | chr1  | 208371601 | 208419074 | PLXNA2       | plexin A2                                                        | 8435.9521  |
| 104  | chr1  | 100103112 | 100159722 | PALMD        | palmdelphin                                                      | 8406.585   |
| 105  | chr16 | 81505802  | 81561494  | CMIP         | c-Maf inducing protein                                           | 8398.3536  |
| 106  | chr12 | 109195156 | 109252637 | SSH1         | slingshot protein phosphatase 1                                  | 8369.2336  |
| 107  | chr6  | 126101265 | 126162051 | NCOA7        | nuclear receptor coactivator 7                                   | 8327.682   |
| 108  | chr12 | 12928214  | 12994430  | DDX47        | DEAD-box helicase 47                                             | 8204.1624  |
| 109  | chr9  | 130278993 | 130337520 | FAM129B      | family with sequence similarity 129 member B                     | 8199.6327  |
| 110  | chr8  | 119067375 | 119126218 | EXT1         | exostosin glycosyltransferase 1                                  | 8190.9456  |
| 111  | chr22 | 25347837  | 25425402  | KIAA1671     | KIAA1671                                                         | 8167.5945  |
| 112  | chr19 | 39137654  | 39201612  | ACTN4        | actinin alpha 4                                                  | 8167.4366  |
| 113  | chr3  | 159540667 | 159603318 | SCHIP1       | schwannomin interacting protein 1                                | 8138.3649  |
| 114  | chr9  | 101078720 | 101139000 | TBC1D2       | TBC1 domain family member 2                                      | 8137.8     |
| 115  | chr14 | 74178270  | 74230072  | MIR4505      | microRNA 4505                                                    | 8127.7338  |
| 116  | chr1  | 16463917  | 16509856  | EPHA2        | EPH receptor A2                                                  | 8122.0152  |
| 117  | chr6  | 151320145 | 151393521 | MTHFD1L      | methylenetetrahydrofolate dehydrogenase (NADP+ dependent) 1-like | 8108.048   |
| 118  | chr8  | 17503830  | 17557739  | MTUS1        | microtubule associated tumor suppressor 1                        | 8102.5227  |
| 119  | chr7  | 111616551 | 111677685 | DOCK4        | dedicator of cytokinesis 4                                       | 8100.255   |
| 120  | chr9  | 127019384 | 127073952 | NEK6         | NIMA related kinase 6                                            | 8043.3232  |
| 121  | chr1  | 235095440 | 235149137 | SNORA14B     | small nucleolar RNA, H/ACA box 14B                               | 8038.4409  |
| 122  | chr3  | 191045181 | 191097926 | CCDC50       | coiled-coil domain containing 50                                 | 8022.5145  |
| 123  | chr14 | 75397956  | 75457164  | PGF          | placental growth factor                                          | 8016.7632  |
| 124  | chr7  | 111798628 | 111847952 | ZNF277       | zinc finger protein 277                                          | 8000.3528  |
| 125  | chr5  | 71402815  | 71463379  | MAP1B        | microtubule associated protein 1B                                | 7994.448   |
| 126  | chr5  | 95897241  | 95951367  | CAST         | calpastatin                                                      | 7913.2212  |
| 127  | chr12 | 13232121  | 13290136  | GSG1         | germ cell associated 1                                           | 7907.4445  |
| 128  | chr2  | 235859137 | 235915831 | SH3BP4       | SH3 domain binding protein 4                                     | 7897.4742  |
| 129  | chr16 | 81710741  | 81764822  | LOC100129617 | uncharacterized LOC100129617                                     | 7868.7855  |

| Rank | chr   | start     | end       | Gene         | Gene description                                                      | ERG signal |
|------|-------|-----------|-----------|--------------|-----------------------------------------------------------------------|------------|
| 130  | chr3  | 14472158  | 14531301  | GRIP2        | glutamate receptor interacting protein 2                              | 7824.6189  |
| 131  | chr12 | 120661895 | 120704645 | PXN          | paxillin                                                              | 7801.875   |
| 132  | chr17 | 61476061  | 61529605  | CYB561       | cytochrome b561                                                       | 7790.652   |
| 133  | chr16 | 86932780  | 86987079  | FOXL1        | forkhead box L1                                                       | 7786.4766  |
| 134  | chr5  | 34570828  | 34629550  | RAI14        | retinoic acid induced 14                                              | 7780.665   |
| 135  | chr1  | 25030753  | 25099953  | CLIC4        | chloride intracellular channel 4                                      | 7764.24    |
| 136  | chr2  | 159974227 | 160026948 | TANC1        | tetratricopeptide repeat, ankyrin repeat and coiled-coil containing 1 | 7755.2591  |
| 137  | chr14 | 68924231  | 68973711  | ZFP36L1      | ZFP36 ring finger protein like 1                                      | 7743.62    |
| 138  | chr3  | 42054220  | 42116156  | TRAK1        | trafficking kinesin protein 1                                         | 7729.6128  |
| 139  | chr5  | 72110560  | 72169936  | TNPO1        | transportin 1                                                         | 7724.8176  |
| 140  | chr11 | 95939449  | 95997914  | MIR1260B     | microRNA 1260b                                                        | 7717.38    |
| 141  | chr1  | 144906644 | 144942213 | PDE4DIP      | phosphodiesterase 4D interacting protein                              | 7697.1316  |
| 142  | chr13 | 29014019  | 29070474  | FLT1         | fms related tyrosine kinase 1                                         | 7683.5255  |
| 143  | chr2  | 46272094  | 46326612  | EPAS1        | endothelial PAS domain protein 1                                      | 7670.6826  |
| 144  | chr21 | 37793876  | 37861255  | CLDN14       | claudin 14                                                            | 7660.9923  |
| 145  | chr1  | 21577891  | 21632742  | LOC100506801 | uncharacterized LOC100506801                                          | 7646.2294  |
| 146  | chr4  | 158898061 | 158955914 | FAM198B      | family with sequence similarity 198 member B                          | 7613.4548  |
| 147  | chr7  | 22599345  | 22651757  | LOC100506178 | uncharacterized LOC100506178                                          | 7589.2576  |
| 148  | chr4  | 141143186 | 141199775 | SCOC         | short coiled-coil protein                                             | 7577.2671  |
| 149  | chr2  | 192695705 | 192744828 | SDPR         | serum deprivation response                                            | 7574.7666  |
| 150  | chr11 | 33708994  | 33760268  | C11orf91     | chromosome 11 open reading frame 91                                   | 7562.915   |
| 151  | chr1  | 66796708  | 66841160  | PDE4B        | phosphodiesterase 4B                                                  | 7556.84    |
| 152  | chr9  | 79265360  | 79333580  | PRUNE2       | prune homolog 2                                                       | 7524.666   |
| 153  | chr11 | 108724134 | 108778731 | DDX10        | DEAD-box helicase 10                                                  | 7518.0069  |
| 154  | chr12 | 25041524  | 25103335  | BCAT1        | branched chain amino acid transaminase 1                              | 7516.2176  |
| 155  | chr4  | 57929006  | 57986466  | IGFBP7-AS1   | IGFBP7 antisense RNA 1                                                | 7510.022   |
| 156  | chr2  | 188262068 | 188314011 | CALCRL       | calcitonin receptor like receptor                                     | 7505.7635  |
| 157  | chr13 | 110949666 | 111001529 | COL4A1       | collagen type IV alpha 1 chain                                        | 7504.5761  |
| 158  | chr1  | 214574393 | 214630384 | PTPN14       | protein tyrosine phosphatase, non-receptor type 14                    | 7485.9967  |
| 159  | chr5  | 77779125  | 77831452  | SCAMP1       | secretory carrier membrane protein 1                                  | 7467.0629  |
| 160  | chr14 | 69401382  | 69449544  | ACTN1-AS1    | ACTN1 antisense RNA 1                                                 | 7455.4776  |
| 161  | chr7  | 137637767 | 137688169 | LOC100130880 | uncharacterized LOC100130880                                          | 7454.4558  |
| 162  | chr2  | 45464108  | 45521250  | LINC01121    | long intergenic non-protein coding RNA 1121                           | 7439.8884  |
| 163  | chr20 | 10602727  | 10656474  | JAG1         | jagged 1                                                              | 7438.5848  |
| 164  | chr2  | 207985589 | 208032776 | KLF7         | Kruppel like factor 7                                                 | 7422.5151  |
| 165  | chr10 | 112247002 | 112290867 | DUSP5        | dual specificity phosphatase 5                                        | 7421.958   |
| 166  | chr1  | 94749745  | 94801650  | ARHGAP29     | Rho GTPase activating protein 29                                      | 7396.4625  |
| 167  | chr12 | 52277472  | 52322378  | ANKRD33      | ankyrin repeat domain 33                                              | 7378.0558  |
| 168  | chr10 | 31252447  | 31303765  | ZNF438       | zinc finger protein 438                                               | 7359.0012  |
| 169  | chr6  | 7953617   | 8007754   | PIP5K1P1     | phosphatidylinositol-4-phosphate 5-kinase type 1 pseudogene 1         | 7335.5635  |
| 170  | chr1  | 56921546  | 56973803  | PLPP3        | phospholipid phosphatase 3                                            | 7331.6571  |
| 171  | chr1  | 12192344  | 12247089  | TNFRSF1B     | TNF receptor superfamily member 1B                                    | 7324.881   |
| 172  | chr5  | 39500217  | 39548277  | DAB2         | DAB2, clathrin adaptor protein                                        | 7290.702   |
| 173  | chr17 | 38467102  | 38507762  | RARA         | retinoic acid receptor alpha                                          | 7290.338   |
| 174  | chr2  | 37869801  | 37917334  | CDC42EP3     | CDC42 effector protein 3                                              | 7267.7957  |

| Rank | chr   | start     | end       | Gene         | Gene description                                                             | ERG signal |
|------|-------|-----------|-----------|--------------|------------------------------------------------------------------------------|------------|
| 175  | chr9  | 112777122 | 112836210 | AKAP2        | A-kinase anchoring protein 2                                                 | 7191.0096  |
| 176  | chr5  | 139670398 | 139727157 | HBEGF        | heparin binding EGF like growth factor                                       | 7180.0135  |
| 177  | chr15 | 68632510  | 68684237  | ITGA11       | integrin subunit alpha 11                                                    | 7179.7076  |
| 178  | chr11 | 86625033  | 86681653  | LOC100506368 | uncharacterized LOC100506368                                                 | 7162.43    |
| 179  | chr10 | 129765110 | 129817637 | PTPRE        | protein tyrosine phosphatase, receptor type E                                | 7159.4301  |
| 180  | chr10 | 80872033  | 80921265  | ZMIZ1        | zinc finger MIZ-type containing 1                                            | 7158.3328  |
| 181  | chr2  | 135154002 | 135205383 | MGAT5        | mannosyl (alpha-1,6-)-glycoprotein beta-1,6-N-acetyl-glucosaminyltransferase | 7157.3733  |
| 182  | chr7  | 39626787  | 39674552  | RALA         | RAS like proto-oncogene A                                                    | 7150.4205  |
| 183  | chr7  | 100736576 | 100783380 | SERPINE1     | serpin family E member 1                                                     | 7118.8884  |
| 184  | chr18 | 3245189   | 3284288   | MYL12B       | myosin light chain 12B                                                       | 7096.4685  |
| 185  | chr12 | 11945824  | 11994797  | ETV6         | ETS variant 6                                                                | 7096.1877  |
| 186  | chr7  | 108042675 | 108097635 | NRCAM        | neuronal cell adhesion molecule                                              | 7089.84    |
| 187  | chr17 | 2073163   | 2120642   | SMG6         | SMG6, nonsense mediated mRNA decay factor                                    | 7088.6147  |
| 188  | chr13 | 99532268  | 99581959  | DOCK9        | dedicator of cytokinesis 9                                                   | 7075.9984  |
| 189  | chr15 | 96859967  | 96903973  | MIR1469      | microRNA 1469                                                                | 7067.3636  |
| 190  | chr9  | 37915738  | 37970760  | SLC25A51     | solute carrier family 25 member 51                                           | 7064.8248  |
| 191  | chr10 | 112134837 | 112181444 | SMNDC1       | survival motor neuron domain containing 1                                    | 7037.657   |
| 192  | chr3  | 11589842  | 11646558  | VGLL4        | vestigial like family member 4                                               | 7032.784   |
| 193  | chr9  | 139401748 | 139446529 | MIR4673      | microRNA 4673                                                                | 7030.617   |
| 194  | chr1  | 19232814  | 19284138  | IFFO2        | intermediate filament family orphan 2                                        | 7015.9908  |
| 195  | chr17 | 45333484  | 45394524  | ITGB3        | integrin subunit beta 3                                                      | 7007.392   |
| 196  | chr15 | 89632849  | 89687934  | ABHD2        | abhydrolase domain containing 2                                              | 6984.778   |
| 197  | chr14 | 23004002  | 23059643  | DAD1         | defender against cell death 1                                                | 6982.9455  |
| 198  | chr11 | 124745532 | 124791853 | ROBO4        | roundabout guidance receptor 4                                               | 6957.4142  |
| 199  | chr18 | 47185467  | 47228859  | LIPG         | lipase G, endothelial type                                                   | 6921.024   |
| 200  | chr7  | 116311272 | 116357883 | MET          | MET proto-oncogene, receptor tyrosine kinase                                 | 6907.7502  |
| 201  | chr15 | 65132749  | 65191149  | PLEKHO2      | pleckstrin homology domain containing O2                                     | 6897.04    |
| 202  | chr1  | 19755550  | 19805613  | CAPZB        | capping actin protein of muscle Z-line beta subunit                          | 6888.6688  |
| 203  | chr20 | 31049560  | 31090763  | NOL4L        | nucleolar protein 4 like                                                     | 6880.901   |
| 204  | chr8  | 10632651  | 10677678  | MIR1322      | microRNA 1322                                                                | 6866.6175  |
| 205  | chr3  | 152031952 | 152078765 | TMEM14EP     | transmembrane protein 14E, pseudogene                                        | 6834.698   |
| 206  | chr8  | 42328245  | 42394362  | SLC20A2      | solute carrier family 20 member 2                                            | 6829.8861  |
| 207  | chr6  | 142692082 | 142738972 | ADGRG6       | adhesion G protein-coupled receptor G6                                       | 6808.428   |
| 208  | chr1  | 156055108 | 156101097 | LMNA         | lamin A/C                                                                    | 6801.7731  |
| 209  | chr6  | 142617695 | 142665657 | ADGRG6       | adhesion G protein-coupled receptor G6                                       | 6791.4192  |
| 210  | chr22 | 24774026  | 24831106  | ADORA2A      | adenosine A2a receptor                                                       | 6786.812   |
| 211  | chr8  | 38852016  | 38901539  | TM2D2        | TM2 domain containing 2                                                      | 6749.9849  |
| 212  | chr6  | 11193176  | 11237658  | NEDD9        | neural precursor cell expressed, developmentally down-regulated 9            | 6743.4712  |
| 213  | chr7  | 22670184  | 22717894  | IL6          | interleukin 6                                                                | 6717.568   |
| 214  | chr12 | 11849871  | 11901402  | ETV6         | ETS variant 6                                                                | 6714.4893  |
| 215  | chr22 | 37877566  | 37922556  | CARD10       | caspase recruitment domain family member 10                                  | 6708.009   |
| 216  | chr1  | 151917047 | 151968416 | S100A10      | S100 calcium binding protein A10                                             | 6703.6545  |
| 217  | chr21 | 30534434  | 30592865  | LINC00189    | long intergenic non-protein coding RNA 189                                   | 6696.1926  |
| 218  | chr8  | 142007360 | 142050583 | PTK2         | protein tyrosine kinase 2                                                    | 6677.9535  |
| 219  | chr8  | 142126368 | 142175949 | DENND3       | DENN domain containing 3                                                     | 6673.6026  |

| Rank | chr   | start     | end       | Gene     | Gene description                                           | ERG signal |
|------|-------|-----------|-----------|----------|------------------------------------------------------------|------------|
| 220  | chr11 | 75016703  | 75064229  | ARRB1    | arrestin beta 1                                            | 6667.8978  |
| 221  | chr14 | 63640432  | 63683445  | RHOJ     | ras homolog family member J                                | 6667.015   |
| 222  | chr5  | 151038387 | 151079942 | SPARC    | secreted protein acidic and cysteine rich                  | 6652.9555  |
| 223  | chr17 | 17584029  | 17631609  | RAI1     | retinoic acid induced 1                                    | 6604.104   |
| 224  | chr20 | 49969845  | 50011168  | MIR3194  | microRNA 3194                                              | 6603.4154  |
| 225  | chr15 | 41196458  | 41235507  | DLL4     | delta like canonical Notch ligand 4                        | 6591.4712  |
| 226  | chr5  | 72898836  | 72952298  | ARHGEF28 | Rho guanine nucleotide exchange factor 28                  | 6575.826   |
| 227  | chr6  | 18361792  | 18409413  | RNF144B  | ring finger protein 144B                                   | 6557.4117  |
| 228  | chr3  | 101848372 | 101901316 | ZPLD1    | zona pellucida like domain containing 1                    | 6554.4672  |
| 229  | chr13 | 30086710  | 30140562  | MTUS2    | microtubule associated tumor suppressor candidate 2        | 6553.7884  |
| 230  | chr16 | 66390760  | 66423157  | CDH5     | cadherin 5                                                 | 6550.6734  |
| 231  | chr9  | 134508244 | 134558764 | RAPGEF1  | Rap guanine nucleotide exchange factor 1                   | 6532.236   |
| 232  | chr20 | 52506728  | 52567222  | SUMO1P1  | SUMO1 pseudogene 1                                         | 6497.0556  |
| 233  | chr10 | 126723028 | 126775223 | MIR4296  | microRNA 4296                                              | 6493.058   |
| 234  | chr15 | 90337697  | 90395919  | MIR5094  | microRNA 5094                                              | 6480.1086  |
| 235  | chr10 | 74055316  | 74098640  | DNAJB12  | DnaJ heat shock protein family (Hsp40) member B12          | 6472.6056  |
| 236  | chr1  | 101601773 | 101654083 | S1PR1    | sphingosine-1-phosphate receptor 1                         | 6449.823   |
| 237  | chr7  | 130565017 | 130607898 | NA       | NA                                                         | 6449.3024  |
| 238  | chr6  | 7877002   | 7916727   | TXNDC5   | thioredoxin domain containing 5                            | 6435.45    |
| 239  | chr6  | 136355016 | 136400144 | PDE7B    | phosphodiesterase 7B                                       | 6435.2528  |
| 240  | chr1  | 36598548  | 36654745  | TRAPPC3  | trafficking protein particle complex 3                     | 6428.9368  |
| 241  | chr11 | 122026517 | 122069685 | MIR100   | microRNA 100                                               | 6423.3984  |
| 242  | chr8  | 131489679 | 131542160 | ASAP1    | ArfGAP with SH3 domain, ankyrin repeat and PH domain 1     | 6407.9301  |
| 243  | chr13 | 110867562 | 110920082 | COL4A1   | collagen type IV alpha 1 chain                             | 6402.188   |
| 244  | chr1  | 36807484  | 36854230  | STK40    | serine/threonine kinase 40                                 | 6390.1782  |
| 245  | chr10 | 129704859 | 129748683 | PTPRE    | protein tyrosine phosphatase, receptor type E              | 6385.1568  |
| 246  | chr4  | 95448637  | 95498909  | PDLIM5   | PDZ and LIM domain 5                                       | 6379.5168  |
| 247  | chr3  | 145873369 | 145915695 | PLOD2    | procollagen-lysine,2-oxoglutarate 5-dioxygenase 2          | 6353.1326  |
| 248  | chr12 | 54796490  | 54827997  | ITGA5    | integrin subunit alpha 5                                   | 6351.8112  |
| 249  | chr5  | 141184158 | 141231551 | PCDH1    | protocadherin 1                                            | 6345.9227  |
| 250  | chr15 | 39393712  | 39435307  | C15orf54 | chromosome 15 open reading frame 54                        | 6309.9615  |
| 251  | chr5  | 14427667  | 14478864  | FAM105A  | family with sequence similarity 105 member A               | 6307.4704  |
| 252  | chr1  | 208095464 | 208138534 | CD34     | CD34 molecule                                              | 6292.527   |
| 253  | chr3  | 50263544  | 50299319  | GNAI2    | G protein subunit alpha i2                                 | 6285.6675  |
| 254  | chr2  | 56109410  | 56152051  | EFEMP1   | EGF containing fibulin like extracellular matrix protein 1 | 6263.9629  |
| 255  | chr3  | 15332026  | 15374833  | SH3BP5   | SH3 domain binding protein 5                               | 6262.6641  |
| 256  | chr10 | 114804459 | 114854425 | TCF7L2   | transcription factor 7 like 2                              | 6255.7432  |
| 257  | chr15 | 90904797  | 90964446  | IQGAP1   | IQ motif containing GTPase activating protein 1            | 6251.2152  |
| 258  | chr4  | 10089401  | 10126639  | WDR1     | WD repeat domain 1                                         | 6237.365   |
| 259  | chr12 | 79801578  | 79849830  | MIR1252  | microRNA 1252                                              | 6229.3332  |
| 260  | chr2  | 105984844 | 106027805 | FHL2     | four and a half LIM domains 2                              | 6194.9762  |
| 261  | chr7  | 23371703  | 23419064  | IGF2BP3  | insulin like growth factor 2 mRNA binding protein 3        | 6180.6105  |
| 262  | chr12 | 109015324 | 109062920 | SELPLG   | selectin P ligand                                          | 6168.4416  |
| 263  | chr2  | 161060300 | 161100546 | ITGB6    | integrin subunit beta 6                                    | 6153.6134  |
| 264  | chr14 | 61964468  | 62005635  | PRKCH    | protein kinase C eta                                       | 6146.2331  |

| Rank | chr   | start     | end       | Gene      | Gene description                                                            | ERG signal |
|------|-------|-----------|-----------|-----------|-----------------------------------------------------------------------------|------------|
| 265  | chr15 | 78325837  | 78370609  | TBC1D2B   | TBC1 domain family member 2B                                                | 6133.764   |
| 266  | chr11 | 65237697  | 65276784  | MALAT1    | metastasis associated lung adenocarcinoma transcript 1 (non-protein coding) | 6132.7503  |
| 267  | chr10 | 17027311  | 17074366  | CUBN      | cubilin                                                                     | 6121.8555  |
| 268  | chr13 | 40436169  | 40475462  | MIR4305   | microRNA 4305                                                               | 6110.0615  |
| 269  | chr11 | 103456279 | 103505834 | MIR4693   | microRNA 4693                                                               | 6105.176   |
| 270  | chr6  | 12566975  | 12609976  | PHACTR1   | phosphatase and actin regulator 1                                           | 6101.8419  |
| 271  | chr12 | 706727    | 756637    | NINJ2     | ninjurin 2                                                                  | 6099.002   |
| 272  | chr10 | 94571418  | 94610800  | EXOC6     | exocyst complex component 6                                                 | 6096.3336  |
| 273  | chr15 | 39869932  | 39892833  | THBS1     | thrombospondin 1                                                            | 6096.2462  |
| 274  | chr17 | 25658699  | 25713076  | TBC1D3P5  | TBC1 domain family member 3 pseudogene 5                                    | 6090.224   |
| 275  | chr20 | 43200748  | 43245818  | ADA       | adenosine deaminase                                                         | 6088.957   |
| 276  | chr10 | 30315030  | 30353229  | KIAA1462  | KIAA1462                                                                    | 6088.9206  |
| 277  | chr7  | 107219602 | 107263790 | BCAP29    | B-cell receptor associated protein 29                                       | 6084.6876  |
| 278  | chr18 | 46448305  | 46487531  | SMAD7     | SMAD family member 7                                                        | 6032.9588  |
| 279  | chr15 | 74273779  | 74318968  | PML       | promyelocytic leukemia                                                      | 6028.2126  |
| 280  | chr1  | 2159960   | 2188985   | SKI       | SKI proto-oncogene                                                          | 6025.59    |
| 281  | chr15 | 86121513  | 86165183  | AKAP13    | A-kinase anchoring protein 13                                               | 6013.359   |
| 282  | chr12 | 125135279 | 125181009 | NCOR2     | nuclear receptor corepressor 2                                              | 6004.349   |
| 283  | chr20 | 23120881  | 23161834  | LINC00656 | long intergenic non-protein coding RNA 656                                  | 6003.7098  |
| 284  | chr5  | 141570711 | 141632115 | SPRY4     | sprouty RTK signaling antagonist 4                                          | 5999.1708  |
| 285  | chr11 | 10312641  | 10352480  | ADM       | adrenomedullin                                                              | 5991.7856  |
| 286  | chr16 | 77598161  | 77631922  | NUDT7     | nudix hydrolase 7                                                           | 5982.4492  |
| 287  | chr2  | 28608599  | 28647824  | FOSL2     | FOS like 2, AP-1 transcription factor subunit                               | 5981.8125  |
| 288  | chr13 | 28952320  | 28988985  | FLT1      | fms related tyrosine kinase 1                                               | 5976.395   |
| 289  | chr6  | 100705470 | 100754004 | SIM1      | single-minded family bHLH transcription factor 1                            | 5974.5354  |
| 290  | chr3  | 71552454  | 71601729  | MIR1284   | microRNA 1284                                                               | 5947.4925  |
| 291  | chr18 | 33035450  | 33072612  | INO80C    | INO80 complex subunit C                                                     | 5938.4876  |
| 292  | chr2  | 102419441 | 102462030 | MAP4K4    | mitogen-activated protein kinase kinase kinase kinase 4                     | 5936.9066  |
| 293  | chr15 | 63503648  | 63554166  | APH1B     | aph-1 homolog B, gamma-secretase subunit                                    | 5920.7096  |
| 294  | chr4  | 120014010 | 120061776 | MYOZ2     | myozenin 2                                                                  | 5918.2074  |
| 295  | chr1  | 59218437  | 59252850  | LINC01135 | long intergenic non-protein coding RNA 1135                                 | 5912.1534  |
| 296  | chr1  | 47673162  | 47708150  | TAL1      | TAL bHLH transcription factor 1, erythroid differentiation factor           | 5895.478   |
| 297  | chr13 | 21606726  | 21655987  | LATS2     | large tumor suppressor kinase 2                                             | 5871.9112  |
| 298  | chr10 | 96988528  | 97036814  | PDLIM1    | PDZ and LIM domain 1                                                        | 5852.2632  |
| 299  | chr1  | 94126759  | 94168135  | BCAR3     | breast cancer anti-estrogen resistance 3                                    | 5842.2912  |
| 300  | chr14 | 59771321  | 59810200  | DAAM1     | dishevelled associated activator of morphogenesis 1                         | 5835.7379  |
| 301  | chr10 | 97237939  | 97279206  | SORBS1    | sorbin and SH3 domain containing 1                                          | 5826.9004  |
| 302  | chr6  | 34981838  | 35017423  | ANKS1A    | ankyrin repeat and sterile alpha motif domain containing 1A                 | 5814.589   |
| 303  | chr1  | 65326422  | 65366272  | JAK1      | Janus kinase 1                                                              | 5814.115   |
| 304  | chr10 | 104532541 | 104577425 | WBP1L     | WW domain binding protein 1-like                                            | 5807.9896  |
| 305  | chr12 | 66318181  | 66358000  | HMGA2     | high mobility group AT-hook 2                                               | 5801.6283  |
| 306  | chr15 | 71053164  | 71100652  | UACA      | uveal autoantigen with coiled-coil domains and ankyrin repeats              | 5798.2848  |
| 307  | chr10 | 17240970  | 17282024  | TRDMT1    | tRNA aspartic acid methyltransferase 1                                      | 5796.8248  |
| 308  | chr10 | 13715819  | 13759358  | PRPF18    | pre-mRNA processing factor 18                                               | 5795.0409  |
| 309  | chr4  | 145546782 | 145589364 | HHIP      | hedgehog interacting protein                                                | 5782.6356  |

| Rank | chr   | start     | end       | Gene         | Gene description                                                                       | ERG signal |
|------|-------|-----------|-----------|--------------|----------------------------------------------------------------------------------------|------------|
| 310  | chr16 | 75270190  | 75308198  | BCAR1        | BCAR1, Cas family scaffolding protein                                                  | 5781.0168  |
| 311  | chr18 | 8704044   | 8752689   | MTCL1        | microtubule crosslinking factor 1                                                      | 5779.026   |
| 312  | chr2  | 64993514  | 65040880  | SERTAD2      | SERTA domain containing 2                                                              | 5754.969   |
| 313  | chr9  | 27108464  | 27156219  | TEK          | TEK receptor tyrosine kinase                                                           | 5744.9265  |
| 314  | chr3  | 149083873 | 149120825 | TM4SF1       | transmembrane 4 L six family member 1                                                  | 5742.3408  |
| 315  | chr5  | 76077074  | 76135449  | F2RL1        | F2R like trypsin receptor 1                                                            | 5720.75    |
| 316  | chr6  | 30456672  | 30512885  | HLA-E        | major histocompatibility complex, class I, E                                           | 5711.2408  |
| 317  | chr11 | 9707628   | 9750951   | SWAP70       | SWAP switching B-cell complex 70kDa subunit                                            | 5705.6391  |
| 318  | chr13 | 97978840  | 98022356  | MBNL2        | muscleblind like splicing regulator 2                                                  | 5704.9476  |
| 319  | chr13 | 41130535  | 41167057  | FOXO1        | forkhead box O1                                                                        | 5697.432   |
| 320  | chr21 | 27477358  | 27523185  | APP          | amyloid beta precursor protein                                                         | 5696.2961  |
| 321  | chr8  | 23172880  | 23216185  | LOC100507156 | uncharacterized LOC100507156                                                           | 5690.277   |
| 322  | chr1  | 59346222  | 59377199  | LINC01135    | long intergenic non-protein coding RNA 1135                                            | 5681.1818  |
| 323  | chr3  | 171842338 | 171875238 | FNDC3B       | fibronectin type III domain containing 3B                                              | 5678.54    |
| 324  | chr7  | 131195597 | 131243357 | PODXL        | podocalyxin like                                                                       | 5664.336   |
| 325  | chr14 | 90848345  | 90886727  | CALM1        | calmodulin 1                                                                           | 5645.9922  |
| 326  | chr16 | 55558042  | 55603700  | LPCAT2       | lysophosphatidylcholine acyltransferase 2                                              | 5638.763   |
| 327  | chr22 | 38596816  | 38638062  | MAFF         | MAF bZIP transcription factor F                                                        | 5638.3282  |
| 328  | chr2  | 216261075 | 216304089 | FN1          | fibronectin 1                                                                          | 5617.6284  |
| 329  | chr1  | 162640068 | 162681118 | DDR2         | discoidin domain receptor tyrosine kinase 2                                            | 5611.535   |
| 330  | chr5  | 39072725  | 39120383  | RICTOR       | RPTOR independent companion of MTOR complex 2                                          | 5609.3466  |
| 331  | chr2  | 36762322  | 36800715  | FEZ2         | fasciculation and elongation protein zeta 2                                            | 5609.2173  |
| 332  | chr13 | 28895394  | 28933838  | FLT1         | fms related tyrosine kinase 1                                                          | 5608.9796  |
| 333  | chr10 | 21602547  | 21662898  | MIR1915      | microRNA 1915                                                                          | 5600.5728  |
| 334  | chr7  | 27134521  | 27166245  | HOTAIRM1     | HOXA transcript antisense RNA, myeloid-specific 1                                      | 5599.286   |
| 335  | chr22 | 50323285  | 50364932  | PIM3         | Pim-3 proto-oncogene, serine/threonine kinase                                          | 5597.3568  |
| 336  | chr3  | 187974205 | 188017014 | LPP          | LIM domain containing preferred translocation partner in lipoma                        | 5590.8554  |
| 337  | chr2  | 99306978  | 99348975  | MGAT4A       | mannosyl (alpha-1,3-)-glycoprotein beta-1,4-N-acetylglucosaminyltransferase, isozyme A | 5585.601   |
| 338  | chr2  | 43651625  | 43697034  | THADA        | THADA, armadillo repeat containing                                                     | 5585.307   |
| 339  | chr14 | 75017968  | 75062638  | LTBP2        | latent transforming growth factor beta binding protein 2                               | 5579.283   |
| 340  | chr13 | 99596419  | 99636897  | DOCK9        | dedicator of cytokinesis 9                                                             | 5577.8684  |
| 341  | chr2  | 161125504 | 161167477 | ITGB6        | integrin subunit beta 6                                                                | 5574.0144  |
| 342  | chr1  | 218632189 | 218673693 | TGFB2-AS1    | TGFB2 antisense RNA 1 (head to head)                                                   | 5569.8368  |
| 343  | chr5  | 16699130  | 16745840  | MYO10        | myosin X                                                                               | 5553.819   |
| 344  | chr2  | 56211127  | 56246415  | MIR216B      | microRNA 216b                                                                          | 5550.8024  |
| 345  | chr3  | 99352188  | 99390233  | COL8A1       | collagen type VIII alpha 1 chain                                                       | 5543.1565  |
| 346  | chr12 | 52400605  | 52440853  | GRASP        | general receptor for phosphoinositides 1 associated scaffold protein                   | 5542.1496  |
| 347  | chr6  | 166988327 | 167031931 | RPS6KA2      | ribosomal protein S6 kinase A2                                                         | 5537.708   |
| 348  | chr4  | 141004647 | 141038815 | MAML3        | mastermind like transcriptional coactivator 3                                          | 5535.216   |
| 349  | chr10 | 59995571  | 60044501  | IPMK         | inositol polyphosphate multikinase                                                     | 5529.09    |
| 350  | chr19 | 41803142  | 41835555  | HNRNPUL1     | heterogeneous nuclear ribonucleoprotein U like 1                                       | 5519.9339  |
| 351  | chr5  | 75979048  | 76018544  | NCRUPAR      | non-protein coding RNA, upstream of F2R/PAR1                                           | 5517.5912  |
| 352  | chr12 | 124905710 | 124952336 | NCOR2        | nuclear receptor corepressor 2                                                         | 5515.8558  |
| 353  | chr16 | 69401345  | 69452143  | TERF2        | telomeric repeat binding factor 2                                                      | 5511.583   |
| 354  | chr11 | 124615820 | 124643202 | VSIG2        | V-set and immunoglobulin domain containing 2                                           | 5506.5202  |



| Rank | chr   | start     | end       | Gene          | Gene description                                              | ERG signal |
|------|-------|-----------|-----------|---------------|---------------------------------------------------------------|------------|
| 355  | chr2  | 216555908 | 216594850 | LINC00607     | long intergenic non-protein coding RNA 607                    | 5506.3988  |
| 356  | chr8  | 129032630 | 129073009 | MIR1207       | microRNA 1207                                                 | 5503.6577  |
| 357  | chr9  | 18456734  | 18494619  | ADAMTSL1      | ADAMTS like 1                                                 | 5493.325   |
| 358  | chr9  | 116261612 | 116291620 | RGS3          | regulator of G-protein signaling 3                            | 5491.464   |
| 359  | chr9  | 97674539  | 97715969  | C9orf3        | chromosome 9 open reading frame 3                             | 5489.475   |
| 360  | chr16 | 89364100  | 89403432  | LOC100287036  | uncharacterized LOC100287036                                  | 5482.8808  |
| 361  | chr8  | 42036063  | 42074167  | PLAT          | plasminogen activator, tissue type                            | 5471.7344  |
| 362  | chr13 | 95735116  | 95790436  | ABCC4         | ATP binding cassette subfamily C member 4                     | 5471.148   |
| 363  | chr13 | 99127033  | 99163851  | STK24         | serine/threonine kinase 24                                    | 5460.1094  |
| 364  | chr3  | 182961918 | 183006368 | B3GNT5        | UDP-GlcNAc:betaGal beta-1,3-N-acetylglucosaminyltransferase 5 | 5458.46    |
| 365  | chr1  | 153721288 | 153763769 | SLC27A3       | solute carrier family 27 member 3                             | 5454.5604  |
| 366  | chr6  | 3795352   | 3834058   | FAM50B        | family with sequence similarity 50 member B                   | 5449.8048  |
| 367  | chr6  | 56554400  | 56598202  | DST           | dystonin                                                      | 5448.9688  |
| 368  | chr3  | 170027858 | 170084730 | SKIL          | SKI like proto-oncogene                                       | 5448.3376  |
| 369  | chr1  | 32027644  | 32063653  | TINAGL1       | tubulointerstitial nephritis antigen like 1                   | 5437.359   |
| 370  | chr1  | 204041971 | 204078982 | SOX13         | SRY-box 13                                                    | 5436.9159  |
| 371  | chr12 | 46757347  | 46797912  | SLC38A2       | solute carrier family 38 member 2                             | 5431.6535  |
| 372  | chr10 | 33445447  | 33488222  | NRP1          | neuropilin 1                                                  | 5428.1475  |
| 373  | chr3  | 159478762 | 159516479 | IQCJ-SCHIP1   | IQCJ-SCHIP1 readthrough                                       | 5427.4763  |
| 374  | chr16 | 16076415  | 16124453  | ABCC1         | ATP binding cassette subfamily C member 1                     | 5423.4902  |
| 375  | chr5  | 55461898  | 55510615  | ANKRD55       | ankyrin repeat domain 55                                      | 5422.2021  |
| 376  | chr3  | 43427720  | 43461413  | SNRK-AS1      | SNRK antisense RNA 1                                          | 5411.0958  |
| 377  | chr13 | 52977737  | 53025313  | VPS36         | vacuolar protein sorting 36 homolog                           | 5399.876   |
| 378  | chr2  | 225773892 | 225815449 | DOCK10        | dedicator of cytokinesis 10                                   | 5389.9429  |
| 379  | chr2  | 178102987 | 178140882 | MIR3128       | microRNA 3128                                                 | 5377.3005  |
| 380  | chr11 | 130741168 | 130780749 | SNX19         | sorting nexin 19                                              | 5375.0998  |
| 381  | chr11 | 86166775  | 86197958  | CCDC81        | coiled-coil domain containing 81                              | 5372.8309  |
| 382  | chr9  | 75732722  | 75774461  | ANXA1         | annexin A1                                                    | 5363.4615  |
| 383  | chr9  | 128393381 | 128439454 | MAPKAP1       | mitogen-activated protein kinase associated protein 1         | 5353.6826  |
| 384  | chr1  | 38460584  | 38496741  | FHL3          | four and a half LIM domains 3                                 | 5351.236   |
| 385  | chr6  | 46842811  | 46887859  | ADGRF5        | adhesion G protein-coupled receptor F5                        | 5338.188   |
| 386  | chr6  | 36702660  | 36739224  | CPNE5         | copine 5                                                      | 5334.6876  |
| 387  | chr5  | 147758113 | 147798192 | FBXO38        | F-box protein 38                                              | 5314.4754  |
| 388  | chr12 | 125196895 | 125232693 | SCARB1        | scavenger receptor class B member 1                           | 5308.8434  |
| 389  | chr9  | 134268320 | 134313669 | PRRC2B        | proline rich coiled-coil 2B                                   | 5305.833   |
| 390  | chr12 | 96864863  | 96910767  | CDK17         | cyclin dependent kinase 17                                    | 5301.912   |
| 391  | chr3  | 71083083  | 71117008  | FOXP1         | forkhead box P1                                               | 5299.085   |
| 392  | chr17 | 38253769  | 38292089  | MSL1          | male specific lethal 1 homolog                                | 5288.16    |
| 393  | chr16 | 87397076  | 87443486  | FBXO31        | F-box protein 31                                              | 5286.099   |
| 394  | chr7  | 43675602  | 43715196  | STK17A        | serine/threonine kinase 17a                                   | 5281.8396  |
| 395  | chr7  | 107918917 | 107954929 | NRCAM         | neuronal cell adhesion molecule                               | 5279.3592  |
| 396  | chr2  | 151319138 | 151349487 | RND3          | Rho family GTPase 3                                           | 5274.6562  |
| 397  | chr20 | 1350206   | 1382567   | FKBP1A-SDCBP2 | FKBP1A-SDCBP2 readthrough (NMD candidate)                     | 5258.6625  |
| 398  | chr1  | 8432498   | 8474031   | RERE          | arginine-glutamic acid dipeptide repeats                      | 5253.9245  |
| 399  | chr16 | 82659979  | 82692499  | CDH13         | cadherin 13                                                   | 5251.98    |

| Rank | chr   | start     | end       | Gene      | Gene description                                                            | ERG signal |
|------|-------|-----------|-----------|-----------|-----------------------------------------------------------------------------|------------|
| 400  | chr10 | 8081461   | 8109662   | GATA3     | GATA binding protein 3                                                      | 5251.0262  |
| 401  | chr1  | 98779454  | 98818023  | LOC729987 | uncharacterized LOC729987                                                   | 5249.2409  |
| 402  | chr15 | 101706473 | 101742517 | CHSY1     | chondroitin sulfate synthase 1                                              | 5248.0064  |
| 403  | chr1  | 234734161 | 234769328 | LINC00184 | long intergenic non-protein coding RNA 184                                  | 5243.3997  |
| 404  | chr8  | 42109356  | 42159062  | IKBKB     | inhibitor of kappa light polypeptide gene enhancer in B-cells, kinase beta  | 5239.0124  |
| 405  | chr3  | 16091523  | 16128598  | GALNT15   | polypeptide N-acetylgalactosaminyltransferase 15                            | 5234.99    |
| 406  | chr3  | 99260678  | 99298856  | COL8A1    | collagen type VIII alpha 1 chain                                            | 5234.2038  |
| 407  | chr9  | 73020184  | 73055287  | KLF9      | Kruppel like factor 9                                                       | 5233.8573  |
| 408  | chr7  | 22456641  | 22486999  | STEAP1B   | STEAP family member 1B                                                      | 5230.6834  |
| 409  | chr11 | 57528249  | 57570724  | CTNND1    | catenin delta 1                                                             | 5224.425   |
| 410  | chr2  | 206544825 | 206579157 | NRP2      | neuropilin 2                                                                | 5221.8972  |
| 411  | chr1  | 16248952  | 16294373  | ZBTB17    | zinc finger and BTB domain containing 17                                    | 5205.2466  |
| 412  | chr13 | 21360958  | 21403451  | EEF1AKMT1 | eukaryotic translation elongation factor 1 alpha lysine methyltransferase 1 | 5201.1432  |
| 413  | chr17 | 4402305   | 4442011   | SPNS2     | sphingolipid transporter 2                                                  | 5193.5448  |
| 414  | chr6  | 72092870  | 72131383  | MIR30A    | microRNA 30a                                                                | 5191.5524  |
| 415  | chr18 | 53052938  | 53090760  | TCF4      | transcription factor 4                                                      | 5185.3962  |
| 416  | chr8  | 22905960  | 22950966  | LOC254896 | uncharacterized LOC254896                                                   | 5184.6912  |
| 417  | chr2  | 28805346  | 28846017  | PLB1      | phospholipase B1                                                            | 5181.4854  |
| 418  | chr3  | 39186176  | 39223111  | CSRNP1    | cysteine and serine rich nuclear protein 1                                  | 5174.5935  |
| 419  | chr3  | 30551398  | 30592399  | TGFBR2    | transforming growth factor beta receptor 2                                  | 5174.3262  |
| 420  | chr19 | 2461021   | 2508526   | GADD45B   | growth arrest and DNA damage inducible beta                                 | 5168.544   |
| 421  | chr1  | 101700210 | 101731414 | S1PR1     | sphingosine-1-phosphate receptor 1                                          | 5167.3824  |
| 422  | chr6  | 143246919 | 143282358 | HIVEP2    | human immunodeficiency virus type I enhancer binding protein 2              | 5167.0062  |
| 423  | chr14 | 73108164  | 73147405  | DPF3      | double PHD fingers 3                                                        | 5164.1156  |
| 424  | chr13 | 95905533  | 95954644  | ABCC4     | ATP binding cassette subfamily C member 4                                   | 5161.5661  |
| 425  | chr15 | 93159265  | 93199772  | FAM174B   | family with sequence similarity 174 member B                                | 5160.5918  |
| 426  | chr9  | 16687492  | 16728370  | BNC2      | basonuclin 2                                                                | 5158.8036  |
| 427  | chr22 | 31605437  | 31641698  | LIMK2     | LIM domain kinase 2                                                         | 5152.6881  |
| 428  | chr15 | 35964208  | 35999227  | DPH6      | diphthamine biosynthesis 6                                                  | 5147.793   |
| 429  | chr4  | 15653349  | 15694213  | FBXL5     | F-box and leucine rich repeat protein 5                                     | 5144.7776  |
| 430  | chr1  | 90155902  | 90191826  | LRRRC8C   | leucine rich repeat containing 8 family member C                            | 5129.9472  |
| 431  | chr20 | 20710803  | 20747438  | RALGAP2   | Ral GTPase activating protein catalytic alpha subunit 2                     | 5121.573   |
| 432  | chr17 | 73670335  | 73704724  | SAP30BP   | SAP30 binding protein                                                       | 5120.5221  |
| 433  | chr17 | 47891374  | 47929568  | KAT7      | lysine acetyltransferase 7                                                  | 5114.1766  |
| 434  | chr6  | 21726111  | 21774018  | CASC15    | cancer susceptibility candidate 15 (non-protein coding)                     | 5111.6769  |
| 435  | chr16 | 55504280  | 55540769  | MMP2      | matrix metalloproteinase 2                                                  | 5108.46    |
| 436  | chr1  | 236134498 | 236174786 | NID1      | nidogen 1                                                                   | 5092.4032  |
| 437  | chr1  | 234852748 | 234882254 | LINC01132 | long intergenic non-protein coding RNA 1132                                 | 5089.785   |
| 438  | chr9  | 676520    | 717070    | KANK1     | KN motif and ankyrin repeat domains 1                                       | 5089.025   |
| 439  | chr19 | 11241065  | 11291803  | SPC24     | SPC24, NDC80 kinetochore complex component                                  | 5078.8738  |
| 440  | chr17 | 80801535  | 80845650  | ZNF750    | zinc finger protein 750                                                     | 5077.6365  |
| 441  | chr3  | 158361937 | 158403898 | LXN       | latexin                                                                     | 5077.281   |
| 442  | chr11 | 128041074 | 128082002 | ETS1      | ETS proto-oncogene 1, transcription factor                                  | 5075.072   |
| 443  | chrX  | 45602036  | 45669243  | MIR221    | microRNA 221                                                                | 5074.1285  |
| 444  | chr7  | 55600013  | 55642793  | VOPP1     | vesicular, overexpressed in cancer, prosurvival protein 1                   | 5073.708   |

| Rank | chr   | start     | end       | Gene         | Gene description                                                            | ERG signal |
|------|-------|-----------|-----------|--------------|-----------------------------------------------------------------------------|------------|
| 445  | chr5  | 39393909  | 39428614  | DAB2         | DAB2, clathrin adaptor protein                                              | 5066.93    |
| 446  | chr14 | 75103235  | 75140903  | LTBP2        | latent transforming growth factor beta binding protein 2                    | 5066.346   |
| 447  | chr3  | 120134545 | 120170855 | FSTL1        | follistatin like 1                                                          | 5065.245   |
| 448  | chr8  | 55046974  | 55093698  | MRPL15       | mitochondrial ribosomal protein L15                                         | 5064.8816  |
| 449  | chr6  | 1770280   | 1803723   | FOXC1        | forkhead box C1                                                             | 5063.2702  |
| 450  | chr3  | 46966789  | 47004011  | CCDC12       | coiled-coil domain containing 12                                            | 5062.192   |
| 451  | chr8  | 13208329  | 13242131  | DLC1         | DLC1 Rho GTPase activating protein                                          | 5056.7792  |
| 452  | chr2  | 231621362 | 231661962 | CAB39        | calcium binding protein 39                                                  | 5054.7     |
| 453  | chr17 | 67564956  | 67606295  | MAP2K6       | mitogen-activated protein kinase kinase 6                                   | 5051.6258  |
| 454  | chr12 | 50037880  | 50069731  | FMNL3        | formin like 3                                                               | 5035.6431  |
| 455  | chr12 | 59433294  | 59473992  | LRIG3        | leucine rich repeats and immunoglobulin like domains 3                      | 5030.2728  |
| 456  | chr2  | 27993620  | 28034446  | MRPL33       | mitochondrial ribosomal protein L33                                         | 5025.6806  |
| 457  | chr1  | 192490360 | 192530586 | RGS1         | regulator of G-protein signaling 1                                          | 5024.2274  |
| 458  | chr3  | 132122767 | 132165264 | DNAJC13      | DnaJ heat shock protein family (Hsp40) member C13                           | 5023.1454  |
| 459  | chr17 | 15381962  | 15420999  | CDRT4        | CMT1A duplicated region transcript 4                                        | 5020.1582  |
| 460  | chr3  | 69222027  | 69264209  | FRMD4B       | FERM domain containing 4B                                                   | 5019.658   |
| 461  | chr18 | 52985727  | 53020003  | TCF4         | transcription factor 4                                                      | 5018.0064  |
| 462  | chr19 | 16425720  | 16463285  | KLF2         | Kruppel like factor 2                                                       | 5014.9275  |
| 463  | chr2  | 192758779 | 192795677 | SDPR         | serum deprivation response                                                  | 5014.4382  |
| 464  | chr3  | 141107232 | 141146918 | ZBTB38       | zinc finger and BTB domain containing 38                                    | 5004.4046  |
| 465  | chr3  | 99406186  | 99442758  | COL8A1       | collagen type VIII alpha 1 chain                                            | 4995.7352  |
| 466  | chr14 | 77490511  | 77527029  | IRF2BP1      | interferon regulatory factor 2 binding protein like                         | 4988.3588  |
| 467  | chr8  | 29594076  | 29632108  | LINC00589    | long intergenic non-protein coding RNA 589                                  | 4966.9792  |
| 468  | chr22 | 25506006  | 25543365  | LOC100128531 | uncharacterized LOC100128531                                                | 4965.0111  |
| 469  | chr18 | 52900635  | 52935540  | TCF4         | transcription factor 4                                                      | 4963.491   |
| 470  | chr8  | 23000610  | 23039961  | TNFRSF10D    | TNF receptor superfamily member 10d                                         | 4962.1611  |
| 471  | chr12 | 6430963   | 6457470   | TNFRSF1A     | TNF receptor superfamily member 1A                                          | 4959.4597  |
| 472  | chr5  | 180211826 | 180245081 | MGAT1        | mannosyl (alpha-1,3-)-glycoprotein beta-1,2-N-acetylglucosaminyltransferase | 4954.995   |
| 473  | chr15 | 57408983  | 57446631  | TCF12        | transcription factor 12                                                     | 4950.712   |
| 474  | chr8  | 141826821 | 141865802 | PTK2         | protein tyrosine kinase 2                                                   | 4950.587   |
| 475  | chr5  | 34486223  | 34527662  | RAI14        | retinoic acid induced 14                                                    | 4947.8166  |
| 476  | chr10 | 73595271  | 73649750  | ANAPC16      | anaphase promoting complex subunit 16                                       | 4946.6932  |
| 477  | chr4  | 85772482  | 85809999  | WDFY3        | WD repeat and FYVE domain containing 3                                      | 4944.7406  |
| 478  | chr20 | 19781960  | 19821850  | RIN2         | Ras and Rab interactor 2                                                    | 4938.382   |
| 479  | chr3  | 157072605 | 157108241 | PTX3         | pentraxin 3                                                                 | 4932.0224  |
| 480  | chr6  | 144664006 | 144701029 | UTRN         | utrophin                                                                    | 4931.4636  |
| 481  | chr8  | 23384979  | 23420264  | SLC25A37     | solute carrier family 25 member 37                                          | 4925.786   |
| 482  | chr19 | 4367253   | 4404218   | CHAF1A       | chromatin assembly factor 1 subunit A                                       | 4916.345   |
| 483  | chr8  | 8186677   | 8222693   | SGK223       | homolog of rat pragra of Rnd2                                               | 4916.184   |
| 484  | chr4  | 37648842  | 37685250  | RELL1        | RELT like 1                                                                 | 4907.7984  |
| 485  | chr21 | 46497948  | 46531423  | ADARB1       | adenosine deaminase, RNA specific B1                                        | 4907.435   |
| 486  | chr5  | 138836915 | 138876666 | TMEM173      | transmembrane protein 173                                                   | 4905.2734  |
| 487  | chr4  | 40991513  | 41032622  | APBB2        | amyloid beta precursor protein binding family B member 2                    | 4900.1928  |
| 488  | chr11 | 73017243  | 73047294  | ARHGEF17     | Rho guanine nucleotide exchange factor 17                                   | 4898.313   |
| 489  | chr19 | 38488345  | 38536099  | SIPA1L3      | signal induced proliferation associated 1 like 3                            | 4894.785   |

| Rank | chr   | start     | end       | Gene         | Gene description                                                             | ERG signal |
|------|-------|-----------|-----------|--------------|------------------------------------------------------------------------------|------------|
| 490  | chr2  | 112654654 | 112700556 | MERTK        | MER proto-oncogene, tyrosine kinase                                          | 4893.1532  |
| 491  | chr10 | 82202296  | 82238765  | TSPAN14      | tetraspanin 14                                                               | 4890.4929  |
| 492  | chr3  | 57934962  | 57971838  | FLNB         | filamin B                                                                    | 4886.07    |
| 493  | chr1  | 78535927  | 78570988  | GIPC2        | GIPC PDZ domain containing family member 2                                   | 4880.4912  |
| 494  | chr7  | 134518453 | 134552971 | CALD1        | caldesmon 1                                                                  | 4877.3934  |
| 495  | chr6  | 11585122  | 11619428  | TMEM170B     | transmembrane protein 170B                                                   | 4874.8826  |
| 496  | chr17 | 47073053  | 47113806  | IGF2BP1      | insulin like growth factor 2 mRNA binding protein 1                          | 4869.9835  |
| 497  | chr11 | 71638184  | 71675042  | LOC100133315 | transient receptor potential cation channel, subfamily C, member 2-like      | 4868.9418  |
| 498  | chr13 | 77426300  | 77461597  | KCTD12       | potassium channel tetramerization domain containing 12                       | 4867.4563  |
| 499  | chr8  | 13100908  | 13135549  | DLC1         | DLC1 Rho GTPase activating protein                                           | 4863.5964  |
| 500  | chr8  | 32403789  | 32442545  | NRG1         | neuregulin 1                                                                 | 4848.3756  |
| 501  | chr19 | 45088988  | 45130994  | IGSF23       | immunoglobulin superfamily member 23                                         | 4843.2918  |
| 502  | chr3  | 62546655  | 62594547  | CADPS        | calcium dependent secretion activator                                        | 4841.8812  |
| 503  | chr10 | 123870693 | 123910081 | TACC2        | transforming acidic coiled-coil containing protein 2                         | 4840.7852  |
| 504  | chr6  | 17829101  | 17871005  | KIF13A       | kinesin family member 13A                                                    | 4839.912   |
| 505  | chr14 | 50786960  | 50831315  | ATP5S        | ATP synthase, H+ transporting, mitochondrial Fo complex subunit s (factor B) | 4839.1305  |
| 506  | chr10 | 33589872  | 33626997  | NRP1         | neuropilin 1                                                                 | 4829.9625  |
| 507  | chr14 | 23529870  | 23566706  | ACIN1        | apoptotic chromatin condensation inducer 1                                   | 4829.1996  |
| 508  | chr18 | 22806590  | 22835080  | ZNF521       | zinc finger protein 521                                                      | 4826.206   |
| 509  | chr2  | 1710953   | 1760482   | PXDN         | peroxidase                                                                   | 4824.1246  |
| 510  | chr12 | 75943799  | 75980152  | KRR1         | KRR1, small subunit processome component homolog                             | 4824.0431  |
| 511  | chr15 | 99431644  | 99468676  | IGF1R        | insulin like growth factor 1 receptor                                        | 4821.5664  |
| 512  | chr2  | 101491514 | 101525227 | NPAS2        | neuronal PAS domain protein 2                                                | 4817.5877  |
| 513  | chr4  | 141626150 | 141665343 | TBC1D9       | TBC1 domain family member 9                                                  | 4816.8197  |
| 514  | chr5  | 57534553  | 57570533  | PLK2         | polo like kinase 2                                                           | 4814.124   |
| 515  | chr2  | 47076143  | 47110630  | LINC01119    | long intergenic non-protein coding RNA 1119                                  | 4807.4878  |
| 516  | chr2  | 187425987 | 187470811 | ITGAV        | integrin subunit alpha V                                                     | 4805.1328  |
| 517  | chr19 | 16175998  | 16208100  | TPM4         | tropomyosin 4                                                                | 4799.249   |
| 518  | chr3  | 81772370  | 81812120  | GBE1         | 1,4-alpha-glucan branching enzyme 1                                          | 4789.875   |
| 519  | chr1  | 165851021 | 165881423 | MIR3658      | microRNA 3658                                                                | 4788.315   |
| 520  | chr11 | 47414747  | 47449338  | PSMC3        | proteasome 26S subunit, ATPase 3                                             | 4787.3944  |
| 521  | chr19 | 13260177  | 13284020  | STX10        | syntaxin 10                                                                  | 4785.2901  |
| 522  | chr2  | 189155080 | 189189457 | GULP1        | GULP, engulfment adaptor PTB domain containing 1                             | 4785.2784  |
| 523  | chrX  | 114793741 | 114877731 | PLS3         | plastin 3                                                                    | 4779.031   |
| 524  | chr6  | 44007801  | 44041264  | C6orf223     | chromosome 6 open reading frame 223                                          | 4778.5164  |
| 525  | chr8  | 93081545  | 93117088  | RUNX1T1      | RUNX1 translocation partner 1                                                | 4773.4249  |
| 526  | chr14 | 51986189  | 52022536  | FRMD6        | FERM domain containing 6                                                     | 4768.7264  |
| 527  | chr9  | 75601366  | 75639652  | ALDH1A1      | aldehyde dehydrogenase 1 family member A1                                    | 4766.607   |
| 528  | chr1  | 201503948 | 201532721 | RPS10P7      | ribosomal protein S10 pseudogene 7                                           | 4761.9315  |
| 529  | chr3  | 15808578  | 15849135  | ANKRD28      | ankyrin repeat domain 28                                                     | 4761.3918  |
| 530  | chr9  | 6412028   | 6452028   | UHRF2        | ubiquitin like with PHD and ring finger domains 2                            | 4756       |
| 531  | chr4  | 169329139 | 169373745 | DDX60L       | DEAD-box helicase 60-like                                                    | 4754.9996  |
| 532  | chr1  | 231522153 | 231559441 | EGLN1        | egl-9 family hypoxia inducible factor 1                                      | 4746.7624  |
| 533  | chr10 | 29922088  | 29959160  | SVIL         | supervillin                                                                  | 4745.216   |
| 534  | chr10 | 74002103  | 74036785  | DDIT4        | DNA damage inducible transcript 4                                            | 4741.0294  |

| Rank | chr   | start     | end       | Gene      | Gene description                                                                        | ERG signal |
|------|-------|-----------|-----------|-----------|-----------------------------------------------------------------------------------------|------------|
| 535  | chr13 | 76335103  | 76373142  | LMO7      | LIM domain 7                                                                            | 4735.8555  |
| 536  | chr21 | 43345567  | 43382942  | C2CD2     | C2 calcium dependent domain containing 2                                                | 4731.675   |
| 537  | chr4  | 160192576 | 160231043 | RAPGEF2   | Rap guanine nucleotide exchange factor 2                                                | 4731.441   |
| 538  | chr4  | 140810997 | 140844480 | MGST2     | microsomal glutathione S-transferase 2                                                  | 4731.1479  |
| 539  | chr5  | 172174129 | 172206194 | DUSP1     | dual specificity phosphatase 1                                                          | 4726.381   |
| 540  | chr5  | 66123699  | 66158132  | MAST4     | microtubule associated serine/threonine kinase family member 4                          | 4720.7643  |
| 541  | chr3  | 45672008  | 45712383  | LIMD1-AS1 | LIMD1 antisense RNA 1                                                                   | 4711.7625  |
| 542  | chr5  | 73034451  | 73071905  | ARHGEF28  | Rho guanine nucleotide exchange factor 28                                               | 4711.7132  |
| 543  | chr20 | 37427180  | 37460293  | PPP1R16B  | protein phosphatase 1 regulatory subunit 16B                                            | 4708.6686  |
| 544  | chr2  | 201240167 | 201274031 | SPATS2L   | spermatogenesis associated serine rich 2 like                                           | 4707.096   |
| 545  | chr2  | 182642509 | 182679441 | SSFA2     | sperm specific antigen 2                                                                | 4686.6708  |
| 546  | chr6  | 157921035 | 157958550 | MIR3692   | microRNA 3692                                                                           | 4681.872   |
| 547  | chr11 | 69059906  | 69089967  | MYEOV     | myeloma overexpressed                                                                   | 4677.4916  |
| 548  | chr10 | 17090606  | 17127859  | CUBN      | cubilin                                                                                 | 4675.2515  |
| 549  | chr12 | 106455932 | 106486421 | NUAK1     | NUAK family kinase 1                                                                    | 4670.9148  |
| 550  | chr21 | 46711695  | 46741729  | LOC642852 | uncharacterized LOC642852                                                               | 4670.287   |
| 551  | chr11 | 64618415  | 64647572  | EHD1      | EH domain containing 1                                                                  | 4665.12    |
| 552  | chr1  | 156445853 | 156476372 | MEF2D     | myocyte enhancer factor 2D                                                              | 4660.2513  |
| 553  | chr1  | 8228959   | 8278094   | SLC45A1   | solute carrier family 45 member 1                                                       | 4657.998   |
| 554  | chr5  | 133884985 | 133918251 | JADE2     | jade family PHD finger 2                                                                | 4657.24    |
| 555  | chr16 | 75321500  | 75357754  | BCAR1     | BCAR1, Cas family scaffolding protein                                                   | 4647.7628  |
| 556  | chr22 | 37624204  | 37663752  | RAC2      | ras-related C3 botulinum toxin substrate 2 (rho family, small GTP binding protein Rac2) | 4646.89    |
| 557  | chr6  | 143139893 | 143169601 | HIVEP2    | human immunodeficiency virus type I enhancer binding protein 2                          | 4646.3312  |
| 558  | chr2  | 232023973 | 232057781 | ARMC9     | armadillo repeat containing 9                                                           | 4645.2192  |
| 559  | chr15 | 48827010  | 48860105  | FBN1      | fibrillin 1                                                                             | 4643.2285  |
| 560  | chr18 | 51735540  | 51779013  | SNORA37   | small nucleolar RNA, H/ACA box 37                                                       | 4629.8745  |
| 561  | chr1  | 201453974 | 201477419 | CSRP1     | cysteine and glycine rich protein 1                                                     | 4628.043   |
| 562  | chr17 | 57829891  | 57875903  | MIR21     | microRNA 21                                                                             | 4624.206   |
| 563  | chr20 | 6541310   | 6573333   | BMP2      | bone morphogenetic protein 2                                                            | 4601.7051  |
| 564  | chr3  | 168932711 | 168964325 | MECOM     | MDS1 and EVI1 complex locus                                                             | 4590.3528  |
| 565  | chr12 | 48193067  | 48216827  | HDAC7     | histone deacetylase 7                                                                   | 4588.056   |
| 566  | chr12 | 27700958  | 27732556  | PPFIBP1   | PPFIA binding protein 1                                                                 | 4588.0296  |
| 567  | chr6  | 151176897 | 151217964 | MTHFD1L   | methylenetetrahydrofolate dehydrogenase (NADP+ dependent) 1-like                        | 4587.1839  |
| 568  | chr8  | 55221482  | 55252806  | SOX17     | SRY-box 17                                                                              | 4582.7012  |
| 569  | chr6  | 111782983 | 111817348 | REV3L     | REV3 like, DNA directed polymerase zeta catalytic subunit                               | 4577.418   |
| 570  | chr6  | 21913807  | 21955197  | CASC15    | cancer susceptibility candidate 15 (non-protein coding)                                 | 4569.456   |
| 571  | chr10 | 116382745 | 116415227 | ABLIM1    | actin binding LIM protein 1                                                             | 4563.721   |
| 572  | chr12 | 123589198 | 123636651 | PITPNM2   | phosphatidylinositol transfer protein membrane associated 2                             | 4560.2333  |
| 573  | chr18 | 60087029  | 60119539  | TNFRSF11A | TNF receptor superfamily member 11a                                                     | 4557.902   |
| 574  | chr4  | 90796838  | 90829530  | MMRN1     | multimerin 1                                                                            | 4553.9956  |
| 575  | chr12 | 50576851  | 50619051  | LIMA1     | LIM domain and actin binding 1                                                          | 4553.38    |
| 576  | chr3  | 170443413 | 170478626 | RPL22L1   | ribosomal protein L22 like 1                                                            | 4549.5196  |
| 577  | chr11 | 95869569  | 95903004  | MIR1260B  | microRNA 1260b                                                                          | 4547.16    |
| 578  | chr12 | 52607179  | 52639216  | KRT7      | keratin 7                                                                               | 4546.0503  |
| 579  | chr17 | 1964953   | 1995350   | SMG6      | SMG6, nonsense mediated mRNA decay factor                                               | 4544.3515  |

| Rank | chr   | start     | end       | Gene         | Gene description                                               | ERG signal |
|------|-------|-----------|-----------|--------------|----------------------------------------------------------------|------------|
| 580  | chr1  | 23879628  | 23908578  | MDS2         | myelodysplastic syndrome 2 translocation associated            | 4539.36    |
| 581  | chr12 | 124851552 | 124879957 | NCOR2        | nuclear receptor corepressor 2                                 | 4533.438   |
| 582  | chr9  | 140188102 | 140217008 | NRARP        | NOTCH-regulated ankyrin repeat protein                         | 4532.4608  |
| 583  | chr16 | 67570103  | 67607064  | CTCF         | CCCTC-binding factor                                           | 4531.4186  |
| 584  | chr18 | 8776869   | 8815094   | MTCL1        | microtubule crosslinking factor 1                              | 4529.6625  |
| 585  | chr20 | 48752880  | 48789894  | TMEM189      | transmembrane protein 189                                      | 4523.1108  |
| 586  | chr12 | 52557396  | 52589292  | KRT80        | keratin 80                                                     | 4519.6632  |
| 587  | chr3  | 32439956  | 32465877  | CMTM7        | CKLF like MARVEL transmembrane domain containing 7             | 4512.8461  |
| 588  | chr17 | 32561260  | 32587095  | CCL2         | C-C motif chemokine ligand 2                                   | 4510.791   |
| 589  | chr18 | 12271312  | 12311399  | TUBB6        | tubulin beta 6 class V                                         | 4509.7875  |
| 590  | chr7  | 90223291  | 90256274  | CDK14        | cyclin dependent kinase 14                                     | 4502.1795  |
| 591  | chr17 | 73840861  | 73875143  | WBP2         | WW domain binding protein 2                                    | 4501.2266  |
| 592  | chr6  | 163755538 | 163790262 | DKFZp451B082 | uncharacterized LOC401282                                      | 4500.2304  |
| 593  | chr12 | 46915712  | 46958397  | SLC38A2      | solute carrier family 38 member 2                              | 4498.999   |
| 594  | chr17 | 80173445  | 80206085  | SLC16A3      | solute carrier family 16 member 3                              | 4497.792   |
| 595  | chr3  | 62119129  | 62157327  | PTPRG        | protein tyrosine phosphatase, receptor type G                  | 4484.4452  |
| 596  | chr12 | 53432362  | 53462602  | TNS2         | tensin 2                                                       | 4481.568   |
| 597  | chr4  | 114356488 | 114391501 | ANK2         | ankyrin 2                                                      | 4471.1601  |
| 598  | chr2  | 102350953 | 102385911 | MAP4K4       | mitogen-activated protein kinase kinase kinase kinase 4        | 4464.1366  |
| 599  | chr11 | 11996598  | 12028451  | DKK3         | dickkopf WNT signaling pathway inhibitor 3                     | 4453.0494  |
| 600  | chr9  | 134581825 | 134615685 | RAPGEF1      | Rap guanine nucleotide exchange factor 1                       | 4452.59    |
| 601  | chr13 | 32827902  | 32860749  | FRY          | FRY microtubule binding protein                                | 4450.7685  |
| 602  | chr20 | 1301744   | 1326255   | SDCBP2-AS1   | SDCBP2 antisense RNA 1                                         | 4443.8443  |
| 603  | chr1  | 2205847   | 2247261   | LOC100129534 | small nuclear ribonucleoprotein polypeptide N pseudogene       | 4443.7222  |
| 604  | chr1  | 154451768 | 154475583 | TDRD10       | tudor domain containing 10                                     | 4441.4975  |
| 605  | chr9  | 124505038 | 124542790 | DAB2IP       | DAB2 interacting protein                                       | 4439.6352  |
| 606  | chr11 | 114150710 | 114180316 | NNMT         | nicotinamide N-methyltransferase                               | 4432.0182  |
| 607  | chr10 | 71204786  | 71242120  | TSPAN15      | tetraspanin 15                                                 | 4431.5458  |
| 608  | chr8  | 8141652   | 8173485   | FAM86B3P     | family with sequence similarity 86, member A pseudogene        | 4431.1536  |
| 609  | chr8  | 80679387  | 80709466  | HEY1         | hes related family bHLH transcription factor with YRPW motif 1 | 4430.6367  |
| 610  | chr16 | 81638015  | 81669172  | CMIP         | c-Maf inducing protein                                         | 4430.5254  |
| 611  | chr22 | 44415533  | 44456138  | PARVB        | parvin beta                                                    | 4430.0055  |
| 612  | chr15 | 62399537  | 62431639  | C2CD4B       | C2 calcium dependent domain containing 4B                      | 4426.8658  |
| 613  | chr15 | 89163947  | 89194984  | ISG20        | interferon stimulated exonuclease gene 20                      | 4422.7725  |
| 614  | chr10 | 105647010 | 105679224 | OBFC1        | oligonucleotide/oligosaccharide binding fold containing 1      | 4410.0966  |
| 615  | chr18 | 72910729  | 72943788  | TSHZ1        | teashirt zinc finger homeobox 1                                | 4406.7647  |
| 616  | chr7  | 84297215  | 84332826  | SEMA3D       | semaphorin 3D                                                  | 4405.0807  |
| 617  | chr2  | 216692935 | 216717695 | LINC00607    | long intergenic non-protein coding RNA 607                     | 4394.9     |
| 618  | chr14 | 100196359 | 100226465 | EML1         | echinoderm microtubule associated protein like 1               | 4392.4654  |
| 619  | chr14 | 35852457  | 35889861  | NFKBIA       | NFKB inhibitor alpha                                           | 4391.2296  |
| 620  | chr1  | 84608530  | 84642461  | PRKACB       | protein kinase cAMP-activated catalytic subunit beta           | 4390.6714  |
| 621  | chr9  | 120439196 | 120470902 | TLR4         | toll like receptor 4                                           | 4388.1104  |
| 622  | chr8  | 41980787  | 42013983  | AP3M2        | adaptor related protein complex 3 mu 2 subunit                 | 4385.1916  |
| 623  | chr12 | 125397715 | 125426199 | MIR5188      | microRNA 5188                                                  | 4383.6876  |
| 624  | chr11 | 122573352 | 122609473 | UBASH3B      | ubiquitin associated and SH3 domain containing B               | 4377.8652  |

| Rank | chr   | start     | end       | Gene       | Gene description                                           | ERG signal |
|------|-------|-----------|-----------|------------|------------------------------------------------------------|------------|
| 625  | chr6  | 148625044 | 148669159 | SASH1      | SAM and SH3 domain containing 1                            | 4376.208   |
| 626  | chr12 | 66022868  | 66054582  | HMGA2      | high mobility group AT-hook 2                              | 4360.675   |
| 627  | chr1  | 68295105  | 68323002  | GNG12-AS1  | GNG12 antisense RNA 1                                      | 4349.1423  |
| 628  | chr1  | 221982171 | 222014866 | DUSP10     | dual specificity phosphatase 10                            | 4348.435   |
| 629  | chr8  | 49319045  | 49346166  | EFCAB1     | EF-hand calcium binding domain 1                           | 4347.4963  |
| 630  | chr10 | 3109332   | 3148029   | PFKP       | phosphofructokinase, platelet                              | 4345.6731  |
| 631  | chr15 | 77773007  | 77801872  | HMG20A     | high mobility group 20A                                    | 4344.1825  |
| 632  | chr22 | 19954080  | 19991174  | ARVCF      | armadillo repeat gene deleted in velocardiofacial syndrome | 4339.998   |
| 633  | chr14 | 73675149  | 73713315  | PAPLN      | papilin, proteoglycan like sulfated glycoprotein           | 4335.6576  |
| 634  | chr14 | 69237210  | 69263600  | ZFP36L1    | ZFP36 ring finger protein like 1                           | 4333.238   |
| 635  | chr17 | 15847433  | 15886293  | ADORA2B    | adenosine A2b receptor                                     | 4317.346   |
| 636  | chr7  | 139734253 | 139763720 | PARP12     | poly(ADP-ribose) polymerase family member 12               | 4316.9155  |
| 637  | chr11 | 60658352  | 60687832  | PRPF19     | pre-mRNA processing factor 19                              | 4309.976   |
| 638  | chr9  | 16500406  | 16534123  | BNC2       | basonuclin 2                                               | 4309.0326  |
| 639  | chr16 | 86419794  | 86450283  | LINC00917  | long intergenic non-protein coding RNA 917                 | 4308.0957  |
| 640  | chr12 | 93394534  | 93428222  | EEA1       | early endosome antigen 1                                   | 4305.3264  |
| 641  | chr18 | 19746590  | 19774999  | GATA6-AS1  | GATA6 antisense RNA 1 (head to head)                       | 4303.9635  |
| 642  | chr1  | 198878255 | 198907788 | MIR181A1HG | MIR181A1 host gene                                         | 4300.0048  |
| 643  | chr4  | 74958117  | 74984482  | CXCL2      | C-X-C motif chemokine ligand 2                             | 4297.495   |
| 644  | chr1  | 23423442  | 23460165  | LUZP1      | leucine zipper protein 1                                   | 4289.2464  |
| 645  | chr15 | 52272948  | 52314792  | MAPK6      | mitogen-activated protein kinase 6                         | 4289.01    |
| 646  | chr16 | 57660900  | 57688644  | ADGRG1     | adhesion G protein-coupled receptor G1                     | 4286.448   |
| 647  | chr4  | 170164780 | 170193860 | SH3RF1     | SH3 domain containing ring finger 1                        | 4286.392   |
| 648  | chr8  | 13048845  | 13083347  | DLC1       | DLC1 Rho GTPase activating protein                         | 4285.1484  |
| 649  | chr18 | 22853702  | 22880869  | ZNF521     | zinc finger protein 521                                    | 4284.2359  |
| 650  | chr12 | 12013795  | 12046088  | ETV6       | ETS variant 6                                              | 4282.0518  |
| 651  | chr13 | 41608291  | 41650382  | WBP4       | WW domain binding protein 4                                | 4280.6547  |
| 652  | chr13 | 114872138 | 114898518 | RASA3      | RAS p21 protein activator 3                                | 4278.836   |
| 653  | chr7  | 115898195 | 115929818 | CAV2       | caveolin 2                                                 | 4278.5919  |
| 654  | chr3  | 16508745  | 16539038  | RFTN1      | raftlin, lipid raft linker 1                               | 4277.3716  |
| 655  | chr5  | 143541531 | 143572636 | KCTD16     | potassium channel tetramerization domain containing 16     | 4273.827   |
| 656  | chr12 | 31867431  | 31904691  | AMN1       | antagonist of mitotic exit network 1 homolog               | 4273.722   |
| 657  | chr1  | 163115999 | 163145636 | RGS5       | regulator of G-protein signaling 5                         | 4267.728   |
| 658  | chr18 | 20836566  | 20863493  | TMEM241    | transmembrane protein 241                                  | 4265.2368  |
| 659  | chr4  | 38664315  | 38691862  | KLF3       | Kruppel like factor 3                                      | 4258.7662  |
| 660  | chr18 | 21407219  | 21442950  | LAMA3      | laminin subunit alpha 3                                    | 4255.5621  |
| 661  | chr8  | 145001890 | 145027401 | PLEC       | plectin                                                    | 4255.2348  |
| 662  | chr3  | 15670418  | 15691589  | ANKRD28    | ankyrin repeat domain 28                                   | 4253.2539  |
| 663  | chr8  | 125248667 | 125285489 | TMEM65     | transmembrane protein 65                                   | 4249.2588  |
| 664  | chr10 | 14025589  | 14053301  | FRMD4A     | FERM domain containing 4A                                  | 4245.4784  |
| 665  | chr8  | 106635515 | 106673168 | ZFPM2      | zinc finger protein, FOG family member 2                   | 4243.4931  |
| 666  | chr4  | 87998537  | 88030657  | AFF1       | AF4/FMR2 family member 1                                   | 4239.84    |
| 667  | chr3  | 50192378  | 50210933  | SEMA3F     | semaphorin 3F                                              | 4237.962   |
| 668  | chr9  | 133707819 | 133739533 | ABL1       | ABL proto-oncogene 1, non-receptor tyrosine kinase         | 4236.9904  |
| 669  | chr2  | 43132807  | 43157673  | HAO        | 3-hydroxyanthranilate 3,4-dioxygenase                      | 4232.1932  |

| Rank | chr   | start     | end       | Gene      | Gene description                                                          | ERG signal |
|------|-------|-----------|-----------|-----------|---------------------------------------------------------------------------|------------|
| 670  | chr12 | 59306175  | 59336849  | LRIG3     | leucine rich repeats and immunoglobulin like domains 3                    | 4229.9446  |
| 671  | chr3  | 153316720 | 153348420 | C3orf79   | chromosome 3 open reading frame 79                                        | 4228.78    |
| 672  | chr3  | 141242507 | 141277110 | RASA2     | RAS p21 protein activator 2                                               | 4221.566   |
| 673  | chr6  | 11409740  | 11440242  | NEDD9     | neural precursor cell expressed, developmentally down-regulated 9         | 4221.4768  |
| 674  | chr11 | 12131065  | 12161772  | MICAL2    | microtubule associated monoxygenase, calponin and LIM domain containing 2 | 4219.1418  |
| 675  | chr8  | 94884853  | 94919572  | MIR378D2  | microRNA 378d-2                                                           | 4211.4147  |
| 676  | chr16 | 89554103  | 89599361  | ANKRD11   | ankyrin repeat domain 11                                                  | 4208.994   |
| 677  | chr20 | 47432221  | 47464202  | PREX1     | phosphatidylinositol-3,4,5-trisphosphate dependent Rac exchange factor 1  | 4208.6996  |
| 678  | chr8  | 10566986  | 10589116  | SOX7      | SRY-box 7                                                                 | 4202.487   |
| 679  | chr17 | 55944220  | 55972067  | CUEDC1    | CUE domain containing 1                                                   | 4199.3276  |
| 680  | chr10 | 54067865  | 54096882  | PRKG1-AS1 | PRKG1 antisense RNA 1                                                     | 4195.8582  |
| 681  | chr1  | 205239318 | 205284076 | NUAK2     | NUAK family kinase 2                                                      | 4189.3488  |
| 682  | chr10 | 71103138  | 71139805  | HK1       | hexokinase 1                                                              | 4187.3714  |
| 683  | chr5  | 150442022 | 150475957 | TNIP1     | TNFAIP3 interacting protein 1                                             | 4180.792   |
| 684  | chr18 | 3445975   | 3479417   | TGIF1     | TGFB induced factor homeobox 1                                            | 4180.25    |
| 685  | chr3  | 25520141  | 25552824  | RARB      | retinoic acid receptor beta                                               | 4180.1557  |
| 686  | chr10 | 33226337  | 33252978  | ITGB1     | integrin subunit beta 1                                                   | 4177.3088  |
| 687  | chr4  | 120125332 | 120155665 | USP53     | ubiquitin specific peptidase 53                                           | 4176.8541  |
| 688  | chr2  | 197123425 | 197160771 | HECW2     | HECT, C2 and WW domain containing E3 ubiquitin protein ligase 2           | 4171.5482  |
| 689  | chr4  | 3323331   | 3357691   | RGS12     | regulator of G-protein signaling 12                                       | 4171.304   |
| 690  | chr13 | 77873780  | 77905307  | MYCBP2    | MYC binding protein 2, E3 ubiquitin protein ligase                        | 4171.0221  |
| 691  | chr4  | 186682136 | 186715396 | SORBS2    | sorbin and SH3 domain containing 2                                        | 4167.478   |
| 692  | chr1  | 39844584  | 39878154  | KIAA0754  | KIAA0754                                                                  | 4162.68    |
| 693  | chr1  | 59527257  | 59551695  | HSD52     | uncharacterized LOC729467                                                 | 4152.0162  |
| 694  | chr3  | 111564152 | 111594186 | PHLDB2    | pleckstrin homology like domain family B member 2                         | 4141.6886  |
| 695  | chr1  | 65380615  | 65417062  | JAK1      | Janus kinase 1                                                            | 4140.3792  |
| 696  | chr20 | 60929675  | 60958035  | LAMA5     | laminin subunit alpha 5                                                   | 4137.724   |
| 697  | chr4  | 129423270 | 129451406 | PGRMC2    | progesterone receptor membrane component 2                                | 4133.1784  |
| 698  | chr6  | 2102660   | 2128946   | GMDS      | GDP-mannose 4,6-dehydratase                                               | 4129.5306  |
| 699  | chr1  | 95427673  | 95460737  | LOC729970 | hCG2028352-like                                                           | 4126.3872  |
| 700  | chr17 | 76800297  | 76838035  | USP36     | ubiquitin specific peptidase 36                                           | 4124.7634  |
| 701  | chr1  | 219469898 | 219504731 | LYPLAL1   | lysophospholipase like 1                                                  | 4124.2272  |
| 702  | chr7  | 116209723 | 116234155 | CAV1      | caveolin 1                                                                | 4124.1216  |
| 703  | chr11 | 65183244  | 65201127  | NEAT1     | nuclear paraspeckle assembly transcript 1 (non-protein coding)            | 4123.8198  |
| 704  | chr17 | 62078249  | 62103649  | ICAM2     | intercellular adhesion molecule 2                                         | 4122.42    |
| 705  | chr1  | 33445542  | 33473551  | RNF19B    | ring finger protein 19B                                                   | 4117.323   |
| 706  | chr11 | 128361680 | 128389726 | ETS1      | ETS proto-oncogene 1, transcription factor                                | 4114.3482  |
| 707  | chr17 | 25877308  | 25907782  | KSR1      | kinase suppressor of ras 1                                                | 4113.99    |
| 708  | chr2  | 70140474  | 70174476  | MXD1      | MAX dimerization protein 1                                                | 4110.8418  |
| 709  | chr17 | 56061666  | 56085952  | SRSF1     | serine and arginine rich splicing factor 1                                | 4106.7626  |
| 710  | chr6  | 132380260 | 132409920 | LINC01013 | long intergenic non-protein coding RNA 1013                               | 4104.944   |
| 711  | chr14 | 69500314  | 69527724  | ACTN1-AS1 | ACTN1 antisense RNA 1                                                     | 4103.277   |
| 712  | chr12 | 95997866  | 96033544  | PGAM1P5   | phosphoglycerate mutase 1 pseudogene 5                                    | 4099.4022  |
| 713  | chr12 | 26829765  | 26859907  | ITPR2     | inositol 1,4,5-trisphosphate receptor type 2                              | 4099.312   |
| 714  | chr1  | 21648348  | 21673112  | ECE1      | endothelin converting enzyme 1                                            | 4098.442   |



| Rank | chr   | start     | end       | Gene      | Gene description                                   | ERG signal |
|------|-------|-----------|-----------|-----------|----------------------------------------------------|------------|
| 715  | chr2  | 109937694 | 109969240 | MIR4266   | microRNA 4266                                      | 4097.8254  |
| 716  | chr19 | 1245872   | 1267385   | MIDN      | midnolin                                           | 4096.0752  |
| 717  | chr1  | 10436882  | 10478211  | PGD       | phosphogluconate dehydrogenase                     | 4095.7039  |
| 718  | chr5  | 88108952  | 88133571  | MEF2C     | myocyte enhancer factor 2C                         | 4094.1397  |
| 719  | chr1  | 94073030  | 94103055  | BCAR3     | breast cancer anti-estrogen resistance 3           | 4092.4075  |
| 720  | chr5  | 141891092 | 141926663 | FGF1      | fibroblast growth factor 1                         | 4090.665   |
| 721  | chr17 | 79517761  | 79551904  | NPLOC4    | NPL4 homolog, ubiquitin recognition factor         | 4090.3314  |
| 722  | chr3  | 171756088 | 171787202 | FNDC3B    | fibronectin type III domain containing 3B          | 4085.2682  |
| 723  | chr22 | 36835024  | 36868015  | TXN2      | thioredoxin 2                                      | 4084.2858  |
| 724  | chrX  | 64886529  | 64944161  | MSN       | moesin                                             | 4074.5824  |
| 725  | chr10 | 104912295 | 104957958 | NT5C2     | 5'-nucleotidase, cytosolic II                      | 4073.1396  |
| 726  | chr5  | 114866975 | 114896201 | FEM1C     | fem-1 homolog C                                    | 4071.1818  |
| 727  | chr12 | 65045761  | 65077596  | RASSF3    | Ras association domain family member 3             | 4065.3295  |
| 728  | chr5  | 146886123 | 146916919 | DPYSL3    | dihydropyrimidinase like 3                         | 4065.072   |
| 729  | chr22 | 22290513  | 22308177  | PPM1F     | protein phosphatase, Mg2+/Mn2+ dependent 1F        | 4062.72    |
| 730  | chr15 | 42064681  | 42098432  | MAPKBP1   | mitogen-activated protein kinase binding protein 1 | 4060.2453  |
| 731  | chr4  | 152116078 | 152150928 | SH3D19    | SH3 domain containing 19                           | 4060.025   |
| 732  | chr22 | 32020743  | 32059185  | PISD      | phosphatidylserine decarboxylase                   | 4055.631   |
| 733  | chr3  | 43783840  | 43812664  | ABHD5     | abhydrolase domain containing 5                    | 4055.5368  |
| 734  | chr9  | 21575308  | 21606596  | MIR31HG   | MIR31 host gene                                    | 4054.9248  |
| 735  | chr10 | 5983368   | 6014691   | IL15RA    | interleukin 15 receptor subunit alpha              | 4046.9316  |
| 736  | chr20 | 11135809  | 11167972  | LOC339593 | uncharacterized LOC339593                          | 4042.8891  |
| 737  | chr20 | 10330777  | 10358238  | MKKS      | McKusick-Kaufman syndrome                          | 4042.2592  |
| 738  | chr22 | 30804023  | 30832897  | SEC14L2   | SEC14 like lipid binding 2                         | 4039.4726  |
| 739  | chr3  | 98481181  | 98511397  | ST3GAL6   | ST3 beta-galactoside alpha-2,3-sialyltransferase 6 | 4030.8144  |
| 740  | chr9  | 97757587  | 97789303  | C9orf3    | chromosome 9 open reading frame 3                  | 4027.932   |
| 741  | chr14 | 65695886  | 65726439  | MIR4708   | microRNA 4708                                      | 4026.8854  |
| 742  | chr1  | 157962070 | 157991455 | KIRREL    | kin of IRRE like (Drosophila)                      | 4022.8065  |
| 743  | chr18 | 74797764  | 74828004  | MBP       | myelin basic protein                               | 4021.92    |
| 744  | chr9  | 80408187  | 80438391  | GNAQ      | G protein subunit alpha q                          | 4014.1116  |
| 745  | chr3  | 11535205  | 11565864  | VGLL4     | vestigial like family member 4                     | 4010.1972  |
| 746  | chr1  | 150530393 | 150553301 | MCL1      | BCL2 family apoptosis regulator                    | 4006.6092  |
| 747  | chr10 | 16985697  | 17012619  | CUBN      | cubilin                                            | 4003.3014  |
| 748  | chr6  | 155491111 | 155524303 | TIAM2     | T-cell lymphoma invasion and metastasis 2          | 3999.636   |
| 749  | chr1  | 90348223  | 90377003  | LRR8D     | leucine rich repeat containing 8 family member D   | 3991.786   |
| 750  | chr19 | 47404962  | 47441236  | ARHGAP35  | Rho GTPase activating protein 35                   | 3990.14    |
| 751  | chr2  | 182755045 | 182783085 | SSFA2     | sperm specific antigen 2                           | 3990.092   |
| 752  | chr6  | 74403674  | 74435543  | CD109     | CD109 molecule                                     | 3989.9988  |
| 753  | chr15 | 71566007  | 71589810  | THSD4     | thrombospondin type 1 domain containing 4          | 3989.3828  |
| 754  | chr15 | 40615254  | 40637429  | C15orf52  | chromosome 15 open reading frame 52                | 3989.2825  |
| 755  | chr1  | 23491911  | 23526140  | HTR1D     | 5-hydroxytryptamine receptor 1D                    | 3987.6785  |
| 756  | chr22 | 19860871  | 19882203  | TXNRD2    | thioredoxin reductase 2                            | 3986.9508  |
| 757  | chr16 | 4525756   | 4567407   | CDIP1     | cell death inducing p53 target 1                   | 3981.8356  |
| 758  | chr4  | 3107627   | 3137872   | HTT       | huntingtin                                         | 3980.242   |
| 759  | chr12 | 118099654 | 118126726 | KSR2      | kinase suppressor of ras 2                         | 3979.584   |

| Rank | chr   | start     | end       | Gene       | Gene description                                               | ERG signal |
|------|-------|-----------|-----------|------------|----------------------------------------------------------------|------------|
| 760  | chr16 | 30061683  | 30090540  | ALDOA      | aldolase, fructose-bisphosphate A                              | 3979.3803  |
| 761  | chr2  | 46483641  | 46506352  | EPAS1      | endothelial PAS domain protein 1                               | 3978.9672  |
| 762  | chr2  | 65269737  | 65309736  | CEP68      | centrosomal protein 68                                         | 3975.9006  |
| 763  | chr22 | 30673095  | 30702761  | GATSL3     | GATS protein like 3                                            | 3975.244   |
| 764  | chr13 | 42162162  | 42190758  | MIR5006    | microRNA 5006                                                  | 3974.844   |
| 765  | chr10 | 4691236   | 4722168   | LINC00704  | long intergenic non-protein coding RNA 704                     | 3974.762   |
| 766  | chr14 | 85981997  | 86004008  | FLRT2      | fibronectin leucine rich transmembrane protein 2               | 3970.7844  |
| 767  | chr13 | 106755353 | 106786538 | LINC00460  | long intergenic non-protein coding RNA 460                     | 3966.732   |
| 768  | chr17 | 38169818  | 38196043  | SNORD124   | small nucleolar RNA, C/D box 124                               | 3962.5975  |
| 769  | chr6  | 143993616 | 144023304 | PHACTR2    | phosphatase and actin regulator 2                              | 3960.3792  |
| 770  | chr7  | 92249712  | 92276507  | FAM133B    | family with sequence similarity 133 member B                   | 3960.301   |
| 771  | chr7  | 107851008 | 107889400 | NRCAM      | neuronal cell adhesion molecule                                | 3958.2152  |
| 772  | chr22 | 29998610  | 30032565  | NF2        | neurofibromin 2                                                | 3955.7575  |
| 773  | chr6  | 117841464 | 117872581 | DCBLD1     | discoilin, CUB and LCCL domain containing 1                    | 3954.9707  |
| 774  | chr15 | 70981904  | 71009041  | UACA       | uveal autoantigen with coiled-coil domains and ankyrin repeats | 3951.1472  |
| 775  | chr10 | 51558757  | 51589676  | NCOA4      | nuclear receptor coactivator 4                                 | 3948.3563  |
| 776  | chr1  | 86032463  | 86052272  | DDAH1      | dimethylarginine dimethylaminohydrolase 1                      | 3947.9337  |
| 777  | chr16 | 53105210  | 53135206  | CHD9       | chromodomain helicase DNA binding protein 9                    | 3947.4736  |
| 778  | chr1  | 27096980  | 27128304  | PIGV       | phosphatidylinositol glycan anchor biosynthesis class V        | 3943.6916  |
| 779  | chr1  | 161154787 | 161177615 | NDUFS2     | NADH:ubiquinone oxidoreductase core subunit S2                 | 3937.83    |
| 780  | chr19 | 13946293  | 13965188  | LOC284454  | uncharacterized LOC284454                                      | 3935.8285  |
| 781  | chr18 | 3579034   | 3608389   | DLGAP1-AS1 | DLGAP1 antisense RNA 1                                         | 3933.57    |
| 782  | chr20 | 57450093  | 57484555  | GNAS       | GNAS complex locus                                             | 3932.1142  |
| 783  | chr3  | 88079554  | 88111896  | CGGBP1     | CGG triplet repeat binding protein 1                           | 3919.8504  |
| 784  | chr19 | 3422827   | 3461405   | SMIM24     | small integral membrane protein 24                             | 3919.5248  |
| 785  | chr4  | 8184172   | 8208567   | SH3TC1     | SH3 domain and tetratricopeptide repeats 1                     | 3917.837   |
| 786  | chr22 | 47129753  | 47155769  | CERK       | ceramide kinase                                                | 3915.408   |
| 787  | chr5  | 10701698  | 10735583  | DAP        | death associated protein                                       | 3910.329   |
| 788  | chr3  | 27564660  | 27602521  | SLC4A7     | solute carrier family 4 member 7                               | 3907.2552  |
| 789  | chr3  | 158416921 | 158446032 | RARRES1    | retinoic acid receptor responder 1                             | 3906.6962  |
| 790  | chr5  | 169114563 | 169144838 | DOCK2      | dedicator of cytokinesis 2                                     | 3899.42    |
| 791  | chr12 | 14517766  | 14554101  | ATF7IP     | activating transcription factor 7 interacting protein          | 3898.7455  |
| 792  | chr1  | 59593010  | 59618271  | HSD52      | uncharacterized LOC729467                                      | 3895.2462  |
| 793  | chr2  | 222364592 | 222396363 | EPHA4      | EPH receptor A4                                                | 3895.1246  |
| 794  | chr6  | 85350345  | 85378560  | TBX18      | T-box 18                                                       | 3890.8485  |
| 795  | chr2  | 237980549 | 238008217 | COPS8      | COP9 signalosome subunit 8                                     | 3890.1208  |
| 796  | chr10 | 106080794 | 106103813 | ITPRIP     | inositol 1,4,5-trisphosphate receptor interacting protein      | 3883.3053  |
| 797  | chr6  | 56704883  | 56735166  | DST        | dystonin                                                       | 3879.2523  |
| 798  | chr14 | 50436723  | 50469162  | LINC01588  | long intergenic non-protein coding RNA 1588                    | 3876.4605  |
| 799  | chr1  | 15494451  | 15528508  | TMEM51     | transmembrane protein 51                                       | 3875.6866  |
| 800  | chr7  | 50879731  | 50908227  | GRB10      | growth factor receptor bound protein 10                        | 3872.6064  |
| 801  | chr12 | 42958201  | 42985180  | PRICKLE1   | prickle planar cell polarity protein 1                         | 3868.7886  |
| 802  | chr8  | 11709392  | 11749639  | CTSB       | cathepsin B                                                    | 3867.7367  |
| 803  | chr4  | 140956939 | 140988716 | MAML3      | mastermind like transcriptional coactivator 3                  | 3867.2609  |
| 804  | chr4  | 75542683  | 75566825  | BTC        | betacellulin                                                   | 3865.1342  |

| Rank | chr   | start     | end       | Gene       | Gene description                                               | ERG signal |
|------|-------|-----------|-----------|------------|----------------------------------------------------------------|------------|
| 805  | chr16 | 15107268  | 15157004  | NTAN1      | N-terminal asparagine amidase                                  | 3864.4872  |
| 806  | chr17 | 75176087  | 75208327  | SEC14L1    | SEC14 like lipid binding 1                                     | 3862.352   |
| 807  | chr18 | 57540097  | 57572984  | PMAIP1     | phorbol-12-myristate-13-acetate-induced protein 1              | 3860.9338  |
| 808  | chr2  | 113381328 | 113407385 | FLJ42351   | uncharacterized LOC400999                                      | 3859.0417  |
| 809  | chr14 | 54634787  | 54661961  | CDKN3      | cyclin dependent kinase inhibitor 3                            | 3858.708   |
| 810  | chr10 | 92671251  | 92694036  | ANKRD1     | ankyrin repeat domain 1                                        | 3857.5005  |
| 811  | chr14 | 52103387  | 52134150  | FRMD6      | FERM domain containing 6                                       | 3851.5276  |
| 812  | chr12 | 94170210  | 94200126  | CRADD      | CASP2 and RIPK1 domain containing adaptor with death domain    | 3844.206   |
| 813  | chr6  | 78155692  | 78177283  | HTR1B      | 5-hydroxytryptamine receptor 1B                                | 3843.198   |
| 814  | chr9  | 22102108  | 22129706  | CDKN2B-AS1 | CDKN2B antisense RNA 1                                         | 3838.8818  |
| 815  | chr1  | 32389209  | 32422735  | PTP4A2     | protein tyrosine phosphatase type IVA, member 2                | 3838.727   |
| 816  | chr12 | 43660725  | 43687994  | ADAMTS20   | ADAM metalloproteinase with thrombospondin type 1 motif 20     | 3836.7483  |
| 817  | chr2  | 54682061  | 54711422  | SPTBN1     | spectrin beta, non-erythrocytic 1                              | 3831.6105  |
| 818  | chr3  | 128266045 | 128288495 | LINC01565  | long intergenic non-protein coding RNA 1565                    | 3829.97    |
| 819  | chr11 | 86428643  | 86456548  | ME3        | malic enzyme 3                                                 | 3828.566   |
| 820  | chr20 | 30131771  | 30162419  | MCTS2P     | malignant T-cell amplified sequence 2, pseudogene              | 3827.9352  |
| 821  | chr11 | 114028798 | 114052764 | NNMT       | nicotinamide N-methyltransferase                               | 3827.3702  |
| 822  | chr10 | 80980220  | 81007880  | ZMIZ1      | zinc finger MIZ-type containing 1                              | 3819.846   |
| 823  | chr16 | 20861191  | 20892292  | LYRM1      | LYR motif containing 1                                         | 3819.2028  |
| 824  | chr1  | 8916762   | 8941071   | ENO1-AS1   | ENO1 antisense RNA 1                                           | 3818.9439  |
| 825  | chr6  | 34190771  | 34217791  | C6orf1     | chromosome 6 open reading frame 1                              | 3807.118   |
| 826  | chr4  | 19713079  | 19742243  | SLIT2      | slit guidance ligand 2                                         | 3802.9856  |
| 827  | chr3  | 11319953  | 11349694  | ATG7       | autophagy related 7                                            | 3800.8998  |
| 828  | chr17 | 43369876  | 43399615  | MAP3K14    | mitogen-activated protein kinase kinase kinase 14              | 3800.6442  |
| 829  | chr19 | 2031335   | 2062786   | MKNK2      | MAP kinase interacting serine/threonine kinase 2               | 3792.9906  |
| 830  | chr8  | 119015570 | 119039511 | EXT1       | exostosin glycosyltransferase 1                                | 3792.2544  |
| 831  | chr1  | 100054478 | 100080355 | PALMD      | palmdelphin                                                    | 3790.9805  |
| 832  | chr4  | 77598179  | 77627422  | SHROOM3    | shroom family member 3                                         | 3789.8928  |
| 833  | chr11 | 28759542  | 28790624  | METTL15    | methyltransferase like 15                                      | 3788.8958  |
| 834  | chr10 | 75645774  | 75672136  | PLAU       | plasminogen activator, urokinase                               | 3788.2194  |
| 835  | chr5  | 66227448  | 66255812  | MAST4      | microtubule associated serine/threonine kinase family member 4 | 3786.594   |
| 836  | chr5  | 52656263  | 52688321  | FST        | follicle-stimulating hormone receptor 1                        | 3786.0498  |
| 837  | chr3  | 193971756 | 193990785 | LINC00887  | long intergenic non-protein coding RNA 887                     | 3784.8681  |
| 838  | chr1  | 235046954 | 235070019 | LINC01132  | long intergenic non-protein coding RNA 1132                    | 3782.66    |
| 839  | chr21 | 39008230  | 39038555  | DYRK1A     | dual specificity tyrosine phosphorylation regulated kinase 1A  | 3781.5275  |
| 840  | chr3  | 192586514 | 192620440 | MB21D2     | Mab-21 domain containing 2                                     | 3779.3564  |
| 841  | chr12 | 124982325 | 125009826 | NCOR2      | nuclear receptor corepressor 2                                 | 3773.1372  |
| 842  | chr14 | 69141185  | 69170884  | ZFP36L1    | ZFP36 ring finger protein like 1                               | 3771.773   |
| 843  | chr9  | 35744305  | 35762735  | GBA2       | glucosylceramidase beta 2                                      | 3770.778   |
| 844  | chr11 | 86506185  | 86530611  | PRSS23     | protease, serine 23                                            | 3768.9318  |
| 845  | chr15 | 39109282  | 39139297  | C15orf53   | chromosome 15 open reading frame 53                            | 3766.8825  |
| 846  | chr20 | 6643030   | 6666971   | BMP2       | bone morphogenetic protein 2                                   | 3765.9193  |
| 847  | chr2  | 201625536 | 201655055 | BZW1       | basic leucine zipper and W2 domains 1                          | 3760.7206  |
| 848  | chr17 | 40558165  | 40589453  | PTRF       | polymerase I and transcript release factor                     | 3757.6888  |
| 849  | chr4  | 74706513  | 74739286  | CXCL1      | C-X-C motif chemokine ligand 1                                 | 3755.7858  |

| Rank | chr   | start     | end       | Gene         | Gene description                                      | ERG signal |
|------|-------|-----------|-----------|--------------|-------------------------------------------------------|------------|
| 850  | chr7  | 102510132 | 102534051 | LRRC17       | leucine rich repeat containing 17                     | 3755.283   |
| 851  | chr8  | 38643554  | 38666290  | TACC1        | transforming acidic coiled-coil containing protein 1  | 3753.7136  |
| 852  | chr12 | 95595948  | 95626385  | VEZT         | vezatin, adherens junctions transmembrane protein     | 3752.8821  |
| 853  | chr7  | 135343335 | 135377890 | C7orf73      | chromosome 7 open reading frame 73                    | 3749.2175  |
| 854  | chr1  | 94262225  | 94284611  | MIR760       | microRNA 760                                          | 3738.462   |
| 855  | chr16 | 27245202  | 27272126  | FLJ21408     | uncharacterized LOC400512                             | 3737.0512  |
| 856  | chr1  | 150112774 | 150136456 | PLEKHO1      | pleckstrin homology domain containing O1              | 3737.0196  |
| 857  | chr7  | 151156192 | 151183746 | CRYGN        | crystallin gamma N                                    | 3736.3224  |
| 858  | chr14 | 78046604  | 78079561  | SPTLC2       | serine palmitoyltransferase long chain base subunit 2 | 3734.0281  |
| 859  | chr7  | 5700508   | 5734852   | RNF216-IT1   | RNF216 intronic transcript 1                          | 3733.1928  |
| 860  | chr16 | 80812382  | 80842653  | CDYL2        | chromodomain Y-like 2                                 | 3732.4143  |
| 861  | chr8  | 40010065  | 40033670  | C8orf4       | chromosome 8 open reading frame 4                     | 3731.9505  |
| 862  | chr20 | 1783031   | 1807103   | LOC100289473 | cytoskeleton associated protein 2-like pseudogene     | 3728.7528  |
| 863  | chr10 | 82252859  | 82272649  | SH2D4B       | SH2 domain containing 4B                              | 3728.436   |
| 864  | chr2  | 96906577  | 96932932  | TMEM127      | transmembrane protein 127                             | 3726.597   |
| 865  | chr12 | 123353922 | 123381501 | VPS37B       | VPS37B, ESCRT-I subunit                               | 3720.4071  |
| 866  | chr11 | 93860686  | 93886826  | PANX1        | pannexin 1                                            | 3717.108   |
| 867  | chr17 | 46300657  | 46324790  | MIR1203      | microRNA 1203                                         | 3716.482   |
| 868  | chr1  | 144007222 | 144016933 | FAM72D       | family with sequence similarity 72 member D           | 3716.3997  |
| 869  | chr16 | 86596680  | 86625076  | FOXL1        | forkhead box L1                                       | 3714.1968  |
| 870  | chr10 | 1088232   | 1111934   | WDR37        | WD repeat domain 37                                   | 3714.1034  |
| 871  | chr19 | 3365037   | 3405601   | NFIC         | nuclear factor I C                                    | 3711.606   |
| 872  | chr12 | 89605618  | 89633559  | DUSP6        | dual specificity phosphatase 6                        | 3707.7707  |
| 873  | chr1  | 147252559 | 147278057 | GJA5         | gap junction protein alpha 5                          | 3707.4092  |
| 874  | chr1  | 209995527 | 210018047 | DIEXF        | digestive organ expansion factor homolog (zebrafish)  | 3706.792   |
| 875  | chr9  | 128282785 | 128314678 | MAPKAP1      | mitogen-activated protein kinase associated protein 1 | 3699.588   |
| 876  | chr7  | 92380910  | 92412744  | CDK6         | cyclin dependent kinase 6                             | 3699.1108  |
| 877  | chr4  | 54925218  | 54952382  | CHIC2        | cysteine rich hydrophobic domain 2                    | 3697.0204  |
| 878  | chr8  | 96693029  | 96717216  | LOC100500773 | serine/arginine-rich splicing factor 3 pseudogene     | 3695.7736  |
| 879  | chr12 | 32575129  | 32611779  | FGD4         | FYVE, RhoGEF and PH domain containing 4               | 3694.32    |
| 880  | chr7  | 131303077 | 131328571 | PODXL        | podocalyxin like                                      | 3694.0806  |
| 881  | chr5  | 157810644 | 157842911 | CLINT1       | clathrin interactor 1                                 | 3691.3448  |
| 882  | chr1  | 214719175 | 214744821 | PTPN14       | protein tyrosine phosphatase, non-receptor type 14    | 3690.4594  |
| 883  | chr6  | 76187853  | 76213930  | FILIP1       | filamin A interacting protein 1                       | 3689.8955  |
| 884  | chr1  | 60195679  | 60225680  | MIR4711      | microRNA 4711                                         | 3684.1228  |
| 885  | chr8  | 118714062 | 118744801 | MED30        | mediator complex subunit 30                           | 3682.5322  |
| 886  | chr12 | 104669615 | 104701025 | EID3         | EP300 interacting inhibitor of differentiation 3      | 3681.252   |
| 887  | chr3  | 5017629   | 5038735   | BHLHE40-AS1  | BHLHE40 antisense RNA 1                               | 3680.8864  |
| 888  | chr20 | 62669382  | 62689549  | SOX18        | SRY-box 18                                            | 3680.4775  |
| 889  | chr9  | 134088669 | 134116278 | NUP214       | nucleoporin 214                                       | 3680.2797  |
| 890  | chr2  | 47292421  | 47317486  | C2orf61      | chromosome 2 open reading frame 61                    | 3679.542   |
| 891  | chr2  | 54166105  | 54199467  | PSME4        | proteasome activator subunit 4                        | 3676.4924  |
| 892  | chr4  | 170057411 | 170082588 | SH3RF1       | SH3 domain containing ring finger 1                   | 3675.842   |
| 893  | chr1  | 156627130 | 156648296 | NES          | nestin                                                | 3674.4176  |
| 894  | chr10 | 43888967  | 43917255  | HNRNPF       | heterogeneous nuclear ribonucleoprotein F             | 3671.7824  |

| Rank | chr   | start     | end       | Gene        | Gene description                                                           | ERG signal |
|------|-------|-----------|-----------|-------------|----------------------------------------------------------------------------|------------|
| 895  | chr5  | 146845277 | 146868039 | DPYSL3      | dihydropyrimidinase like 3                                                 | 3671.5106  |
| 896  | chr7  | 107706525 | 107737061 | LAMB4       | laminin subunit beta 4                                                     | 3670.4272  |
| 897  | chr8  | 124472826 | 124503350 | FBXO32      | F-box protein 32                                                           | 3668.9848  |
| 898  | chr1  | 12654570  | 12680436  | DHRS3       | dehydrogenase/reductase 3                                                  | 3667.7988  |
| 899  | chr5  | 136804868 | 136835194 | SPOCK1      | SPARC/osteonectin, cwcv and kazal like domains proteoglycan 1              | 3666.4134  |
| 900  | chr19 | 47351252  | 47382795  | AP2S1       | adaptor related protein complex 2 sigma 1 subunit                          | 3665.2966  |
| 901  | chr1  | 198835070 | 198864526 | MIR181A1    | microRNA 181a-1                                                            | 3664.3264  |
| 902  | chr4  | 185303127 | 185331948 | LOC728175   | uncharacterized LOC728175                                                  | 3663.1491  |
| 903  | chr2  | 11513976  | 11545294  | LINC00570   | long intergenic non-protein coding RNA 570                                 | 3657.9424  |
| 904  | chr8  | 56742841  | 56780859  | LYN         | LYN proto-oncogene, Src family tyrosine kinase                             | 3649.728   |
| 905  | chr10 | 45469638  | 45493321  | C10orf10    | chromosome 10 open reading frame 10                                        | 3647.182   |
| 906  | chr12 | 53988319  | 54021000  | ATF7        | activating transcription factor 7                                          | 3643.9315  |
| 907  | chr10 | 93349958  | 93374525  | HECTD2-AS1  | HECTD2 antisense RNA 1                                                     | 3643.2861  |
| 908  | chr15 | 64124559  | 64153381  | HERC1       | HECT and RLD domain containing E3 ubiquitin protein ligase family member 1 | 3643.1008  |
| 909  | chr14 | 69542946  | 69569128  | DCAF5       | DDB1 and CUL4 associated factor 5                                          | 3641.9162  |
| 910  | chr11 | 118779259 | 118801210 | MIR4492     | microRNA 4492                                                              | 3639.4758  |
| 911  | chr6  | 16711125  | 16739375  | ATXN1       | ataxin 1                                                                   | 3638.6     |
| 912  | chr3  | 188247290 | 188277788 | LPP         | LIM domain containing preferred translocation partner in lipoma            | 3635.3616  |
| 913  | chr20 | 48635583  | 48665653  | TRERNA1     | translation regulatory long non-coding RNA 1                               | 3632.456   |
| 914  | chr2  | 188389632 | 188420155 | TFPI        | tissue factor pathway inhibitor                                            | 3632.237   |
| 915  | chr5  | 148512830 | 148533267 | ABLIM3      | actin binding LIM protein family member 3                                  | 3629.6112  |
| 916  | chr5  | 71658153  | 71685956  | PTCD2       | pentatricopeptide repeat domain 2                                          | 3628.2915  |
| 917  | chr3  | 172022810 | 172051269 | GHSR        | growth hormone secretagogue receptor                                       | 3625.6766  |
| 918  | chr7  | 115849832 | 115873624 | TES         | testin LIM domain protein                                                  | 3618.7632  |
| 919  | chr5  | 16983006  | 17022508  | MYO10       | myosin X                                                                   | 3618.3832  |
| 920  | chr20 | 33889707  | 33916248  | UQCC1       | ubiquinol-cytochrome c reductase complex assembly factor 1                 | 3617.5383  |
| 921  | chr4  | 77921623  | 77945294  | Sep-11      | septin 11                                                                  | 3616.9288  |
| 922  | chr16 | 28191726  | 28225619  | XPO6        | exportin 6                                                                 | 3616.3831  |
| 923  | chr8  | 103799507 | 103824070 | AZIN1       | antizyme inhibitor 1                                                       | 3615.6736  |
| 924  | chr4  | 186628706 | 186660531 | SORBS2      | sorbin and SH3 domain containing 2                                         | 3615.32    |
| 925  | chr16 | 87085550  | 87111540  | C16orf95    | chromosome 16 open reading frame 95                                        | 3615.209   |
| 926  | chr4  | 56025571  | 56054076  | KDR         | kinase insert domain receptor                                              | 3611.5835  |
| 927  | chr12 | 13348076  | 13366140  | EMP1        | epithelial membrane protein 1                                              | 3610.9936  |
| 928  | chr1  | 42305877  | 42337192  | HIVEP3      | human immunodeficiency virus type I enhancer binding protein 3             | 3610.6195  |
| 929  | chr12 | 113659125 | 113685746 | TPCN1       | two pore segment channel 1                                                 | 3609.8076  |
| 930  | chr5  | 59039102  | 59066226  | PDE4D       | phosphodiesterase 4D                                                       | 3607.492   |
| 931  | chr5  | 126323048 | 126351691 | Mar-03      | membrane associated ring-CH-type finger 3                                  | 3606.1537  |
| 932  | chr20 | 43964807  | 43990111  | SDC4        | syndecan 4                                                                 | 3598.2288  |
| 933  | chr3  | 43219474  | 43241913  | POMGNT2     | protein O-linked mannose N-acetylglucosaminyltransferase 2 (beta 1,4-)     | 3594.7278  |
| 934  | chr2  | 43384880  | 43407124  | ZFP36L2     | ZFP36 ring finger protein like 2                                           | 3592.406   |
| 935  | chr6  | 157448972 | 157474230 | ARID1B      | AT-rich interaction domain 1B                                              | 3586.636   |
| 936  | chr4  | 138955413 | 138985047 | SLC7A11-AS1 | SLC7A11 antisense RNA 1                                                    | 3579.7872  |
| 937  | chr22 | 24684418  | 24722972  | SPECC1L     | sperm antigen with calponin homology and coiled-coil domains 1 like        | 3577.8112  |
| 938  | chr1  | 155929483 | 155954467 | ARHGEF2     | Rho/Rac guanine nucleotide exchange factor 2                               | 3575.2104  |
| 939  | chr3  | 124550789 | 124580630 | ITGB5       | integrin subunit beta 5                                                    | 3574.9518  |

| Rank | chr   | start     | end       | Gene      | Gene description                                             | ERG signal |
|------|-------|-----------|-----------|-----------|--------------------------------------------------------------|------------|
| 940  | chr15 | 95827713  | 95849368  | LINC01197 | long intergenic non-protein coding RNA 1197                  | 3573.075   |
| 941  | chr6  | 136903582 | 136932602 | MAP7      | microtubule associated protein 7                             | 3572.362   |
| 942  | chr18 | 20684999  | 20718256  | CABLES1   | Cdk5 and Abl enzyme substrate 1                              | 3571.8018  |
| 943  | chr4  | 119672248 | 119697215 | SEC24D    | SEC24 homolog D, COPII coat complex component                | 3570.281   |
| 944  | chr3  | 134079996 | 134094933 | AMOTL2    | angiominin like 2                                            | 3566.9556  |
| 945  | chr8  | 17458742  | 17478982  | PDGFRL    | platelet derived growth factor receptor like                 | 3564.264   |
| 946  | chr5  | 100162859 | 100191484 | ST8SIA4   | ST8 alpha-N-acetyl-neuraminide alpha-2,8-sialyltransferase 4 | 3555.225   |
| 947  | chr3  | 29552841  | 29580793  | RBMS3     | RNA binding motif single stranded interacting protein 3      | 3552.6992  |
| 948  | chr19 | 3140172   | 3163540   | GNA15     | G protein subunit alpha 15                                   | 3551.936   |
| 949  | chr20 | 35458587  | 35487733  | SOGA1     | suppressor of glucose, autophagy associated 1                | 3549.9828  |
| 950  | chr7  | 132093819 | 132118369 | PLXNA4    | plexin A4                                                    | 3549.93    |
| 951  | chr17 | 75100867  | 75126400  | SEC14L1   | SEC14 like lipid binding 1                                   | 3549.087   |
| 952  | chr2  | 188162922 | 188186447 | CALCRL    | calcitonin receptor like receptor                            | 3547.57    |
| 953  | chr19 | 6085543   | 6111915   | RFX2      | regulatory factor X2                                         | 3544.3968  |
| 954  | chr9  | 130522282 | 130534586 | SH2D3C    | SH2 domain containing 3C                                     | 3543.552   |
| 955  | chr11 | 57172478  | 57195439  | SLC43A3   | solute carrier family 43 member 3                            | 3542.8823  |
| 956  | chr3  | 98680214  | 98706191  | DCBLD2    | discoidin, CUB and LCCL domain containing 2                  | 3540.6651  |
| 957  | chr5  | 38782270  | 38808683  | OSMR      | oncostatin M receptor                                        | 3539.342   |
| 958  | chr20 | 32374212  | 32403291  | CHMP4B    | charged multivesicular body protein 4B                       | 3538.9143  |
| 959  | chr1  | 61408245  | 61430322  | NFIA      | nuclear factor I A                                           | 3536.7354  |
| 960  | chr8  | 81876227  | 81904587  | ZNF704    | zinc finger protein 704                                      | 3536.492   |
| 961  | chr10 | 102105079 | 102135379 | SCD       | stearoyl-CoA desaturase                                      | 3536.01    |
| 962  | chr1  | 85904589  | 85932549  | DDAH1     | dimethylarginine dimethylaminohydrolase 1                    | 3534.144   |
| 963  | chr2  | 165625970 | 165652340 | COBLL1    | cordon-bleu WH2 repeat protein like 1                        | 3533.58    |
| 964  | chr9  | 137282867 | 137308168 | RXRA      | retinoid X receptor alpha                                    | 3532.0196  |
| 965  | chr15 | 75320325  | 75341381  | PPCDC     | phosphopantothienoylcysteine decarboxylase                   | 3531.0912  |
| 966  | chr6  | 86158635  | 86176475  | NT5E      | 5'-nucleotidase ecto                                         | 3530.536   |
| 967  | chr18 | 33184673  | 33216739  | MIR3975   | microRNA 3975                                                | 3530.4666  |
| 968  | chr4  | 122606266 | 122634027 | ANXA5     | annexin A5                                                   | 3528.4231  |
| 969  | chr13 | 33758977  | 33783032  | STAR13    | StAR related lipid transfer domain containing 13             | 3521.652   |
| 970  | chr6  | 144451607 | 144481489 | STX11     | syntaxin 11                                                  | 3520.0996  |
| 971  | chr11 | 86213242  | 86237169  | CCDC81    | coiled-coil domain containing 81                             | 3517.269   |
| 972  | chr20 | 39764833  | 39782062  | PLCG1     | phospholipase C gamma 1                                      | 3516.4389  |
| 973  | chr7  | 129535604 | 129566072 | UBE2H     | ubiquitin conjugating enzyme E2 H                            | 3516.0072  |
| 974  | chrX  | 13096405  | 13143786  | FAM9C     | family with sequence similarity 9 member C                   | 3515.6702  |
| 975  | chr5  | 137069452 | 137091471 | HNRNPA0   | heterogeneous nuclear ribonucleoprotein A0                   | 3512.0305  |
| 976  | chr17 | 36603015  | 36630028  | ARHGAP23  | Rho GTPase activating protein 23                             | 3511.69    |
| 977  | chr4  | 90390316  | 90420776  | GPRIN3    | GPRIN family member 3                                        | 3508.992   |
| 978  | chr3  | 66477198  | 66502028  | LRIG1     | leucine rich repeats and immunoglobulin like domains 1       | 3503.513   |
| 979  | chr19 | 16544844  | 16570498  | EPS15L1   | epidermal growth factor receptor pathway substrate 15 like 1 | 3499.2056  |
| 980  | chr5  | 64480351  | 64507179  | ADAMTS6   | ADAM metalloproteinase with thrombospondin type 1 motif 6    | 3498.3712  |
| 981  | chr9  | 136795981 | 136823057 | VAV2      | vav guanine nucleotide exchange factor 2                     | 3498.2192  |
| 982  | chr19 | 780709    | 803768    | PTBP1     | polypyrimidine tract binding protein 1                       | 3498.0503  |
| 983  | chr10 | 30071311  | 30097361  | SVIL      | supervillin                                                  | 3495.91    |
| 984  | chr7  | 116758147 | 116784644 | ST7       | suppression of tumorigenicity 7                              | 3494.9543  |

| Rank | chr   | start     | end       | Gene         | Gene description                                                         | ERG signal |
|------|-------|-----------|-----------|--------------|--------------------------------------------------------------------------|------------|
| 985  | chr14 | 38859962  | 38889501  | CLEC14A      | C-type lectin domain family 14 member A                                  | 3494.4637  |
| 986  | chr13 | 31365490  | 31393265  | LINC00398    | long intergenic non-protein coding RNA 398                               | 3494.095   |
| 987  | chr10 | 29420231  | 29450042  | LYZL1        | lysozyme like 1                                                          | 3493.8492  |
| 988  | chr1  | 54777887  | 54804840  | SSBP3        | single stranded DNA binding protein 3                                    | 3493.1088  |
| 989  | chr20 | 47274365  | 47302350  | PREX1        | phosphatidylinositol-3,4,5-trisphosphate dependent Rac exchange factor 1 | 3492.528   |
| 990  | chr5  | 136676513 | 136699668 | SPOCK1       | SPARC/osteonectin, cwcv and kazal like domains proteoglycan 1            | 3491.774   |
| 991  | chr5  | 71528761  | 71553591  | MRPS27       | mitochondrial ribosomal protein S27                                      | 3491.098   |
| 992  | chr17 | 41593448  | 41624784  | ETV4         | ETS variant 4                                                            | 3490.8304  |
| 993  | chr12 | 110460168 | 110494609 | C12orf76     | chromosome 12 open reading frame 76                                      | 3488.8733  |
| 994  | chr5  | 54275388  | 54303198  | ESM1         | endothelial cell specific molecule 1                                     | 3487.374   |
| 995  | chr10 | 35656896  | 35677623  | CCNY         | cyclin Y                                                                 | 3486.2814  |
| 996  | chr6  | 33736176  | 33758026  | LEMD2        | LEM domain containing 2                                                  | 3485.075   |
| 997  | chr3  | 194586847 | 194606667 | LOC100507391 | uncharacterized LOC100507391                                             | 3484.356   |
| 998  | chr14 | 24886739  | 24909521  | KHNYN        | KH and NYN domain containing                                             | 3483.3678  |
| 999  | chr11 | 12694692  | 12716983  | TEAD1        | TEA domain transcription factor 1                                        | 3481.8542  |
| 1000 | chr22 | 39913923  | 39929399  | ATF4         | activating transcription factor 4                                        | 3477.4572  |
| 1001 | chr11 | 13460502  | 13485922  | BTBD10       | BTB domain containing 10                                                 | 3477.456   |
| 1002 | chr5  | 156966985 | 156992403 | ADAM19       | ADAM metalloproteinase domain 19                                         | 3477.1824  |
| 1003 | chr2  | 128925325 | 128955204 | UGGT1        | UDP-glucose glycoprotein glucosyltransferase 1                           | 3474.9277  |
| 1004 | chr1  | 61899304  | 61921960  | NFIA         | nuclear factor I A                                                       | 3470.8992  |
| 1005 | chr7  | 134828229 | 134853113 | TMEM140      | transmembrane protein 140                                                | 3468.8296  |
| 1006 | chr8  | 51527943  | 51557066  | SNTG1        | syntrophin gamma 1                                                       | 3468.5493  |
| 1007 | chr2  | 109780045 | 109803355 | MIR4265      | microRNA 4265                                                            | 3468.528   |
| 1008 | chr18 | 9091865   | 9120666   | NDUFV2       | NADH:ubiquinone oxidoreductase core subunit V2                           | 3467.6404  |
| 1009 | chr12 | 88691458  | 88720316  | TMTC3        | transmembrane and tetratricopeptide repeat containing 3                  | 3462.96    |
| 1010 | chr8  | 79426995  | 79451666  | PKIA         | protein kinase (cAMP-dependent, catalytic) inhibitor alpha               | 3461.3413  |
| 1011 | chr2  | 55309877  | 55340679  | RTN4         | reticulon 4                                                              | 3459.0646  |
| 1012 | chr13 | 33800889  | 33827658  | STARD13      | StAR related lipid transfer domain containing 13                         | 3458.5548  |
| 1013 | chr4  | 139094875 | 139122358 | SLC7A11      | solute carrier family 7 member 11                                        | 3457.3614  |
| 1014 | chr2  | 164508769 | 164540067 | FIGN         | figetin, microtubule severing factor                                     | 3455.2992  |
| 1015 | chr13 | 49660381  | 49689242  | FNDC3A       | fibronectin type III domain containing 3A                                | 3454.6617  |
| 1016 | chr9  | 124111133 | 124133380 | STOM         | stomatin                                                                 | 3446.0603  |
| 1017 | chr8  | 26297287  | 26324434  | PNMA2        | paraneoplastic Ma antigen 2                                              | 3444.9543  |
| 1018 | chr5  | 159875574 | 159908116 | MIR3142      | microRNA 3142                                                            | 3442.9436  |
| 1019 | chr12 | 69632435  | 69661052  | CPSF6        | cleavage and polyadenylation specific factor 6                           | 3439.7634  |
| 1020 | chr14 | 31730908  | 31766083  | HECTD1       | HECT domain E3 ubiquitin protein ligase 1                                | 3436.5975  |
| 1021 | chr19 | 8404902   | 8433753   | KANK3        | KN motif and ankyrin repeat domains 3                                    | 3436.1541  |
| 1022 | chr4  | 186304538 | 186335408 | ANKRD37      | ankyrin repeat domain 37                                                 | 3435.831   |
| 1023 | chr4  | 177689712 | 177716827 | VEGFC        | vascular endothelial growth factor C                                     | 3435.4705  |
| 1024 | chr2  | 20226531  | 20253281  | LAPTM4A      | lysosomal protein transmembrane 4 alpha                                  | 3434.7     |
| 1025 | chr3  | 156873798 | 156895065 | CCNL1        | cyclin L1                                                                | 3434.6205  |
| 1026 | chr10 | 62715025  | 62740785  | RHOBTB1      | Rho related BTB domain containing 1                                      | 3433.808   |
| 1027 | chr11 | 35638917  | 35664297  | FJX1         | four jointed box 1                                                       | 3431.376   |
| 1028 | chr9  | 33150411  | 33173466  | B4GALT1      | beta-1,4-galactosyltransferase 1                                         | 3430.584   |
| 1029 | chr16 | 4348210   | 4380078   | GLIS2        | GLIS family zinc finger 2                                                | 3428.9968  |

| Rank | chr   | start     | end       | Gene        | Gene description                                         | ERG signal |
|------|-------|-----------|-----------|-------------|----------------------------------------------------------|------------|
| 1030 | chr5  | 55623288  | 55649409  | ANKRD55     | ankyrin repeat domain 55                                 | 3427.0752  |
| 1031 | chr6  | 90006558  | 90034851  | GABRR2      | gamma-aminobutyric acid type A receptor rho2 subunit     | 3426.2823  |
| 1032 | chr19 | 12887958  | 12905706  | JUNB        | JunB proto-oncogene, AP-1 transcription factor subunit   | 3425.364   |
| 1033 | chr10 | 7989009   | 8015326   | GATA3-AS1   | GATA3 antisense RNA 1                                    | 3423.8417  |
| 1034 | chr10 | 75813727  | 75842280  | VCL         | vinculin                                                 | 3420.6494  |
| 1035 | chr1  | 90308100  | 90333234  | LRRC8D      | leucine rich repeat containing 8 family member D         | 3418.224   |
| 1036 | chr5  | 149378863 | 149404335 | HMGXB3      | HMG-box containing 3                                     | 3415.7952  |
| 1037 | chr12 | 26780973  | 26805683  | ITPR2       | inositol 1,4,5-trisphosphate receptor type 2             | 3414.922   |
| 1038 | chr11 | 126204366 | 126226969 | ST3GAL4-AS1 | ST3GAL4 antisense RNA 1 (head to head)                   | 3413.053   |
| 1039 | chr17 | 1456914   | 1494743   | PITPNA      | phosphatidylinositol transfer protein alpha              | 3412.1758  |
| 1040 | chr2  | 237778562 | 237799406 | COPS8       | COP9 signalosome subunit 8                               | 3412.1628  |
| 1041 | chr2  | 68457186  | 68482115  | PPP3R1      | protein phosphatase 3 regulatory subunit B, alpha        | 3410.2872  |
| 1042 | chr17 | 26496707  | 26524176  | PYY2        | peptide YY 2 (pseudogene)                                | 3408.9029  |
| 1043 | chr1  | 33398972  | 33431311  | RNF19B      | ring finger protein 19B                                  | 3408.5306  |
| 1044 | chrX  | 99896826  | 99941255  | SRPX2       | sushi repeat containing protein, X-linked 2              | 3407.7043  |
| 1045 | chr19 | 47676285  | 47715750  | MIR3190     | microRNA 3190                                            | 3405.8295  |
| 1046 | chr11 | 59539067  | 59570619  | STX3        | syntaxin 3                                               | 3401.3056  |
| 1047 | chr8  | 8923227   | 8947797   | MIR4660     | microRNA 4660                                            | 3398.031   |
| 1048 | chr21 | 43629163  | 43655827  | ABCG1       | ATP binding cassette subfamily G member 1                | 3396.9936  |
| 1049 | chr1  | 8746293   | 8775118   | RERE        | arginine-glutamic acid dipeptide repeats                 | 3392.7025  |
| 1050 | chr2  | 224782653 | 224810818 | WDFY1       | WD repeat and FYVE domain containing 1                   | 3385.433   |
| 1051 | chr1  | 9351473   | 9380121   | SPSB1       | spiA/ryanodine receptor domain and SOCS box containing 1 | 3383.3288  |
| 1052 | chr13 | 27743023  | 27770808  | USP12       | ubiquitin specific peptidase 12                          | 3381.4345  |
| 1053 | chr13 | 77281013  | 77305650  | KCTD12      | potassium channel tetramerization domain containing 12   | 3380.1964  |
| 1054 | chr8  | 128217115 | 128238957 | POU5F1B     | POU class 5 homeobox 1B                                  | 3378.9574  |
| 1055 | chr5  | 74952100  | 74977313  | POC5        | POC5 centriolar protein                                  | 3376.0207  |
| 1056 | chr14 | 100824738 | 100853577 | WARS        | tryptophanyl-tRNA synthetase                             | 3374.163   |
| 1057 | chr20 | 10520306  | 10548008  | JAG1        | jagged 1                                                 | 3374.1036  |
| 1058 | chr14 | 85762347  | 85787554  | LINC00911   | long intergenic non-protein coding RNA 911               | 3370.1759  |
| 1059 | chr13 | 107142280 | 107166309 | EFNB2       | ephrin B2                                                | 3368.8658  |
| 1060 | chr20 | 17634951  | 17663857  | RRBP1       | ribosome binding protein 1                               | 3367.549   |
| 1061 | chr22 | 28261235  | 28285922  | PITPNB      | phosphatidylinositol transfer protein beta               | 3364.8381  |
| 1062 | chr1  | 15654527  | 15680271  | FHAD1       | forkhead associated phosphopeptide binding domain 1      | 3364.7408  |
| 1063 | chr7  | 141349034 | 141377140 | KIAA1147    | KIAA1147                                                 | 3364.2882  |
| 1064 | chr9  | 71784333  | 71808379  | TJP2        | tight junction protein 2                                 | 3364.0354  |
| 1065 | chr10 | 122390538 | 122411494 | PLPP4       | phospholipid phosphatase 4                               | 3363.438   |
| 1066 | chr5  | 172355370 | 172383777 | ERGIC1      | endoplasmic reticulum-golgi intermediate compartment 1   | 3363.3888  |
| 1067 | chr12 | 121623957 | 121654020 | P2RX4       | purinergic receptor P2X 4                                | 3361.0434  |
| 1068 | chr10 | 31984188  | 31999298  | ARHGAP12    | Rho GTPase activating protein 12                         | 3360.464   |
| 1069 | chr16 | 27323910  | 27348285  | IL4R        | interleukin 4 receptor                                   | 3358.875   |
| 1070 | chr10 | 126823914 | 126851067 | CTBP2       | C-terminal binding protein 2                             | 3358.8261  |
| 1071 | chr1  | 181057325 | 181076345 | IER5        | immediate early response 5                               | 3355.128   |
| 1072 | chr3  | 105069904 | 105089954 | ALCAM       | activated leukocyte cell adhesion molecule               | 3352.36    |
| 1073 | chr17 | 74683803  | 74713310  | MXRA7       | matrix remodeling associated 7                           | 3351.9952  |
| 1074 | chr12 | 12866720  | 12890992  | CDKN1B      | cyclin dependent kinase inhibitor 1B                     | 3351.9632  |



| Rank | chr   | start     | end       | Gene       | Gene description                                          | ERG signal |
|------|-------|-----------|-----------|------------|-----------------------------------------------------------|------------|
| 1075 | chr6  | 3735967   | 3754926   | PXDC1      | PX domain containing 1                                    | 3351.9512  |
| 1076 | chr11 | 9572879   | 9601106   | WEE1       | WEE1 G2 checkpoint kinase                                 | 3350.5449  |
| 1077 | chr3  | 156391248 | 156413231 | TIPARP-AS1 | TIPARP antisense RNA 1                                    | 3350.2092  |
| 1078 | chr3  | 177060668 | 177079906 | LINC00578  | long intergenic non-protein coding RNA 578                | 3347.412   |
| 1079 | chr10 | 65458640  | 65483371  | REEP3      | receptor accessory protein 3                              | 3346.1043  |
| 1080 | chr2  | 25490234  | 25519251  | DNMT3A     | DNA methyltransferase 3 alpha                             | 3345.6601  |
| 1081 | chr10 | 23104426  | 23139014  | ARMC3      | armadillo repeat containing 3                             | 3344.6596  |
| 1082 | chr3  | 50353720  | 50363956  | HYAL2      | hyaluronoglucosaminidase 2                                | 3342.054   |
| 1083 | chr2  | 191833915 | 191850641 | STAT1      | signal transducer and activator of transcription 1        | 3341.8548  |
| 1084 | chr1  | 186444099 | 186469686 | MIR548F1   | microRNA 548f-1                                           | 3336.5448  |
| 1085 | chr11 | 74464196  | 74496144  | RNF169     | ring finger protein 169                                   | 3332.1764  |
| 1086 | chr14 | 77412839  | 77429282  | IRF2BP1    | interferon regulatory factor 2 binding protein like       | 3328.0632  |
| 1087 | chr2  | 71717691  | 71733523  | DYSF       | dysferlin                                                 | 3327.8864  |
| 1088 | chr17 | 40153902  | 40178140  | NKIRAS2    | NFKB inhibitor interacting Ras like 2                     | 3325.4536  |
| 1089 | chr10 | 127729274 | 127752801 | FANK1      | fibronectin type III and ankyrin repeat domains 1         | 3324.3651  |
| 1090 | chr6  | 30707093  | 30723131  | FLOT1      | flotillin 1                                               | 3321.4698  |
| 1091 | chr7  | 106228810 | 106251022 | CCDC71L    | coiled-coil domain containing 71-like                     | 3320.694   |
| 1092 | chr2  | 39694425  | 39723372  | LOC728730  | uncharacterized LOC728730                                 | 3320.2209  |
| 1093 | chr3  | 64892876  | 64915477  | MIR548A2   | microRNA 548a-2                                           | 3320.0869  |
| 1094 | chr12 | 49882261  | 49909831  | KCNH3      | potassium voltage-gated channel subfamily H member 3      | 3319.428   |
| 1095 | chr1  | 208019451 | 208043291 | CD34       | CD34 molecule                                             | 3318.528   |
| 1096 | chr1  | 2120263   | 2146963   | FAAP20     | Fanconi anemia core complex associated protein 20         | 3316.14    |
| 1097 | chr11 | 111793244 | 111818713 | DIXDC1     | DIX domain containing 1                                   | 3316.0638  |
| 1098 | chr3  | 124760958 | 124783099 | HEG1       | heart development protein with EGF like domains 1         | 3314.5077  |
| 1099 | chr8  | 97323523  | 97348177  | PTDSS1     | phosphatidylserine synthase 1                             | 3311.0322  |
| 1100 | chr22 | 37940992  | 37962201  | CDC42EP1   | CDC42 effector protein 1                                  | 3310.7249  |
| 1101 | chr8  | 90893536  | 90918244  | OSGIN2     | oxidative stress induced growth inhibitor family member 2 | 3308.4012  |
| 1102 | chr7  | 150685431 | 150706437 | NOS3       | nitric oxide synthase 3                                   | 3306.3444  |
| 1103 | chr14 | 61927232  | 61947049  | PRKCH      | protein kinase C eta                                      | 3305.4756  |
| 1104 | chr5  | 95046527  | 95074872  | RHOBTB3    | Rho related BTB domain containing 3                       | 3305.027   |
| 1105 | chr20 | 46906636  | 46928808  | LINC00494  | long intergenic non-protein coding RNA 494                | 3303.628   |
| 1106 | chr3  | 14844486  | 14866635  | FGD5       | FYVE, RhoGEF and PH domain containing 5                   | 3302.4159  |
| 1107 | chr20 | 52194996  | 52241227  | ZNF217     | zinc finger protein 217                                   | 3296.2703  |
| 1108 | chr2  | 192476276 | 192504159 | NABP1      | nucleic acid binding protein 1                            | 3295.7706  |
| 1109 | chr6  | 2763990   | 2785687   | WRNIP1     | Werner helicase interacting protein 1                     | 3293.6046  |
| 1110 | chr2  | 225263189 | 225283614 | FAM124B    | family with sequence similarity 124 member B              | 3292.51    |
| 1111 | chr15 | 83760418  | 83783841  | TM6SF1     | transmembrane 6 superfamily member 1                      | 3288.5892  |
| 1112 | chr8  | 82257275  | 82280287  | FABP5      | fatty acid binding protein 5                              | 3283.8124  |
| 1113 | chr9  | 100768508 | 100800450 | NANS       | N-acetylneuraminase synthase                              | 3283.6376  |
| 1114 | chr11 | 65653947  | 65671575  | CCDC85B    | coiled-coil domain containing 85B                         | 3280.5708  |
| 1115 | chr11 | 128198005 | 128214420 | ETS1       | ETS proto-oncogene 1, transcription factor                | 3278.0755  |
| 1116 | chr1  | 183837877 | 183859119 | COLGALT2   | collagen beta(1-O)galactosyltransferase 2                 | 3277.6406  |
| 1117 | chr17 | 68029134  | 68050595  | KCNJ16     | potassium voltage-gated channel subfamily J member 16     | 3274.9486  |
| 1118 | chr4  | 114878565 | 114902407 | ARSJ       | arylsulfatase family member J                             | 3273.5066  |
| 1119 | chr11 | 6654844   | 6669965   | DCHS1      | dachshous cadherin-related 1                              | 3272.1844  |

| <b>Rank</b> | <b>chr</b> | <b>start</b> | <b>end</b> | <b>Gene</b> | <b>Gene description</b>                           | <b>ERG signal</b> |
|-------------|------------|--------------|------------|-------------|---------------------------------------------------|-------------------|
| 1120        | chr8       | 29511012     | 29533901   | LINC00589   | long intergenic non-protein coding RNA 589        | 3268.5492         |
| 1121        | chr12      | 76413064     | 76434074   | PHLDA1      | pleckstrin homology like domain family A member 1 | 3267.055          |
| 1122        | chr22      | 20861096     | 20888482   | MED15       | mediator complex subunit 15                       | 3264.4112         |
| 1123        | chr2       | 143703574    | 143733599  | KYNU        | kynureninase                                      | 3263.7175         |
| 1124        | chr5       | 171863221    | 171883769  | SH3PXD2B    | SH3 and PX domains 2B                             | 3263.0224         |
| 1125        | chr13      | 74688190     | 74711273   | KLF12       | Kruppel like factor 12                            | 3259.3196         |

**Online Table VII: Super-enhancers identified by enrichment of H3K27ac in VCaP.** Ordered by super-enhancer ranking. Chromosome (chr), start and end indicates genomic position on the GRCh37/hg19 assembly. Super-enhancer-associated gene symbols and description indicated. H3K27ac signal is ChIP-seq read density times length of stitched enhancer. This table spans 5 pages.

| Rank | chr   | start     | end       | Gene       | Gene description                                                | H3K27ac signal |
|------|-------|-----------|-----------|------------|-----------------------------------------------------------------|----------------|
| 1    | chr11 | 63886137  | 63955680  | STIP1      | stress induced phosphoprotein 1                                 | 88952.4513     |
| 2    | chr11 | 65243451  | 65292297  | MIR548AR   | microRNA 548ar                                                  | 61873.2282     |
| 3    | chr13 | 111175330 | 111216273 | RAB20      | RAB20, member RAS oncogene family                               | 61213.8793     |
| 4    | chr11 | 64032734  | 64043730  | GPR137     | G protein-coupled receptor 137                                  | 43743.1876     |
| 5    | chr11 | 65182177  | 65198196  | NEAT1      | nuclear paraspeckle assembly transcript 1 (non-protein coding)  | 40295.7945     |
| 6    | chr11 | 63752577  | 63777355  | OTUB1      | OTU deubiquitinase, ubiquitin aldehyde binding 1                | 35687.7534     |
| 7    | chr11 | 65623144  | 65630267  | CFL1       | cofilin 1                                                       | 34887.7417     |
| 8    | chr11 | 67034111  | 67081494  | ANKRD13D   | ankyrin repeat domain 13D                                       | 33495.0427     |
| 9    | chr1  | 154903961 | 154914522 | PMVK       | phosphomevalonate kinase                                        | 32909.1321     |
| 10   | chr21 | 42859797  | 42909078  | TMPRSS2    | transmembrane protease, serine 2                                | 31529.9838     |
| 11   | chr17 | 48980779  | 49033228  | TOB1       | transducer of ERBB2, 1                                          | 30572.5221     |
| 12   | chr11 | 63989728  | 64001958  | DNAJC4     | DnaJ heat shock protein family (Hsp40) member C4                | 29246.822      |
| 13   | chr11 | 63847857  | 63863960  | FLRT1      | fibronectin leucine rich transmembrane protein 1                | 28555.4499     |
| 14   | chr5  | 180608625 | 180634929 | TRIM7      | tripartite motif containing 7                                   | 27479.7888     |
| 15   | chr1  | 154926182 | 154936882 | PBXIP1     | PBX homeobox interacting protein 1                              | 27221.87       |
| 16   | chr13 | 111362848 | 111370472 | ING1       | inhibitor of growth family member 1                             | 26398.1        |
| 17   | chr11 | 64141627  | 64154286  | MIR1237    | microRNA 1237                                                   | 25869.9324     |
| 18   | chr15 | 93179478  | 93211274  | FAM174B    | family with sequence similarity 174 member B                    | 24924.8844     |
| 19   | chr13 | 111561525 | 111574528 | ANKRD10    | ankyrin repeat domain 10                                        | 24647.1865     |
| 20   | chr13 | 111157318 | 111161605 | COL4A2-AS1 | COL4A2 antisense RNA 1                                          | 24486.0579     |
| 21   | chr13 | 110427487 | 110441741 | IRS2       | insulin receptor substrate 2                                    | 23866.8976     |
| 22   | chr20 | 32231665  | 32256811  | C20orf144  | chromosome 20 open reading frame 144                            | 23446.1304     |
| 23   | chr5  | 176871148 | 176884814 | PRR7-AS1   | PRR7 antisense RNA 1                                            | 23222.6338     |
| 24   | chr11 | 66048281  | 66060928  | YIF1A      | Yip1 interacting factor homolog A, membrane trafficking protein | 23154.1276     |
| 25   | chr11 | 64898317  | 64905391  | SYVN1      | synoviolin 1                                                    | 22991.9148     |
| 26   | chr11 | 64079669  | 64088864  | ESRRA      | estrogen related receptor alpha                                 | 22124.0895     |
| 27   | chr11 | 64122270  | 64130535  | RPS6KA4    | ribosomal protein S6 kinase A4                                  | 21312.129      |
| 28   | chr4  | 1144586   | 1166502   | SPON2      | spondin 2                                                       | 21173.0476     |
| 29   | chr6  | 33681530  | 33716116  | IP6K3      | inositol hexakisphosphate kinase 3                              | 20803.479      |
| 30   | chr13 | 111266463 | 111274529 | NAXD       | NAD(P)HX dehydratase                                            | 20663.4788     |
| 31   | chr12 | 52425902  | 52448137  | NR4A1      | nuclear receptor subfamily 4 group A member 1                   | 19780.256      |
| 32   | chr1  | 154972106 | 154979732 | ZBTB7B     | zinc finger and BTB domain containing 7B                        | 19294.5426     |
| 33   | chr1  | 226297238 | 226323776 | H3F3AP4    | H3 histone, family 3A, pseudogene 4                             | 19285.1646     |
| 34   | chr1  | 154944830 | 154951020 | MIR4258    | microRNA 4258                                                   | 19236.663      |
| 35   | chr6  | 33941828  | 33960377  | MIR1275    | microRNA 1275                                                   | 17710.5852     |
| 36   | chr11 | 65413041  | 65421766  | MIR4489    | microRNA 4489                                                   | 17572.15       |
| 37   | chr17 | 80052835  | 80073000  | FASN       | fatty acid synthase                                             | 17307.6195     |
| 38   | chr8  | 128101730 | 128117517 | PCAT1      | prostate cancer associated transcript 1 (non-protein coding)    | 17177.8347     |
| 39   | chr11 | 64876509  | 64887045  | TM7SF2     | transmembrane 7 superfamily member 2                            | 17093.6064     |
| 40   | chr14 | 38051914  | 38069502  | FOXA1      | forkhead box A1                                                 | 16606.5896     |

| Rank | chr   | start     | end       | Gene         | Gene description                                                   | H3K27ac signal |
|------|-------|-----------|-----------|--------------|--------------------------------------------------------------------|----------------|
| 41   | chr5  | 176816534 | 176832900 | PFN3         | profilin 3                                                         | 16577.1214     |
| 42   | chr13 | 111802997 | 111807699 | ARHGEF7      | Rho guanine nucleotide exchange factor 7                           | 16563.2652     |
| 43   | chr17 | 46795513  | 46807902  | MIR3185      | microRNA 3185                                                      | 16429.0529     |
| 44   | chr11 | 65649873  | 65660445  | CCDC85B      | coiled-coil domain containing 85B                                  | 16245.9924     |
| 45   | chr7  | 38343920  | 38360160  | TARP         | TCR gamma alternate reading frame protein                          | 16147.432      |
| 46   | chr13 | 110220166 | 110231591 | IRS2         | insulin receptor substrate 2                                       | 16137.8125     |
| 47   | chr21 | 46931277  | 46943782  | COL18A1      | collagen type XVIII alpha 1 chain                                  | 16063.923      |
| 48   | chr21 | 38069525  | 38082854  | SIM2         | single-minded family bHLH transcription factor 2                   | 15880.1706     |
| 49   | chr17 | 79476469  | 79487946  | ACTG1        | actin gamma 1                                                      | 15857.7709     |
| 50   | chr9  | 139682680 | 139699797 | CCDC183      | coiled-coil domain containing 183                                  | 15680.8837     |
| 51   | chr19 | 13101378  | 13129125  | NFIX         | nuclear factor I X                                                 | 15616.0116     |
| 52   | chr11 | 67904094  | 67916826  | CHKA         | choline kinase alpha                                               | 15350.9724     |
| 53   | chr21 | 45341791  | 45351179  | AGPAT3       | 1-acylglycerol-3-phosphate O-acyltransferase 3                     | 15185.09       |
| 54   | chr11 | 67570469  | 67576651  | FAM86C2P     | family with sequence similarity 86, member A pseudogene            | 15184.2284     |
| 55   | chr11 | 65335272  | 65345853  | SSSCA1       | Sjogren syndrome/scleroderma autoantigen 1                         | 15119.1909     |
| 56   | chr11 | 63635545  | 63646518  | MARK2        | microtubule affinity regulating kinase 2                           | 15109.821      |
| 57   | chr11 | 67395314  | 67402864  | NUDT8        | nudix hydrolase 8                                                  | 15014.685      |
| 58   | chrX  | 40004652  | 40036241  | BCOR         | BCL6 corepressor                                                   | 14919.4847     |
| 59   | chr11 | 64071181  | 64077111  | ESRRA        | estrogen related receptor alpha                                    | 14747.91       |
| 60   | chr19 | 18598403  | 18619025  | ELL          | elongation factor for RNA polymerase II                            | 14464.2708     |
| 61   | chr5  | 137798958 | 137803788 | EGR1         | early growth response 1                                            | 14419.965      |
| 62   | chr6  | 34502957  | 34521152  | SPDEF        | SAM pointed domain containing ETS transcription factor             | 14363.133      |
| 63   | chr12 | 125203439 | 125232496 | SCARB1       | scavenger receptor class B member 1                                | 14354.158      |
| 64   | chr11 | 66111597  | 66116178  | B4GAT1       | beta-1,4-glucuronyltransferase 1                                   | 14350.8987     |
| 65   | chr15 | 90289537  | 90302901  | MESP1        | mesoderm posterior bHLH transcription factor 1                     | 14213.9504     |
| 66   | chr11 | 63603861  | 63609683  | MARK2        | microtubule affinity regulating kinase 2                           | 14128.8296     |
| 67   | chr11 | 118786625 | 118801815 | BCL9L        | B-cell CLL/lymphoma 9-like                                         | 13999.104      |
| 68   | chr9  | 137247903 | 137271599 | MIR4669      | microRNA 4669                                                      | 13994.8576     |
| 69   | chr17 | 79338162  | 79367830  | LOC100130370 | uncharacterized LOC100130370                                       | 13979.5616     |
| 70   | chr7  | 5458019   | 5470292   | TNRC18       | trinucleotide repeat containing 18                                 | 13948.2645     |
| 71   | chr17 | 80245453  | 80257151  | CSNK1D       | casein kinase 1 delta                                              | 13865.6394     |
| 72   | chr8  | 135731453 | 135767533 | ZFAT         | zinc finger and AT-hook domain containing                          | 13706.792      |
| 73   | chr17 | 79677305  | 79695633  | SLC25A10     | solute carrier family 25 member 10                                 | 13485.7424     |
| 74   | chr17 | 81008290  | 81023614  | B3GNTL1      | UDP-GlcNAc:betaGal beta-1,3-N-acetylglucosaminyltransferase-like 1 | 13475.9256     |
| 75   | chr11 | 67118382  | 67126123  | POLD4        | DNA polymerase delta 4, accessory subunit                          | 13470.1141     |
| 76   | chr11 | 66382346  | 66387011  | RBM14-RBM4   | RBM14-RBM4 readthrough                                             | 13395.5475     |
| 77   | chr7  | 73239144  | 73247376  | CLDN4        | claudin 4                                                          | 13257.636      |
| 78   | chr1  | 19392005  | 19414870  | UBR4         | ubiquitin protein ligase E3 component n-recognin 4                 | 13245.6945     |
| 79   | chr11 | 67269436  | 67277338  | CDK2AP2      | cyclin dependent kinase 2 associated protein 2                     | 13230.3186     |
| 80   | chr11 | 67977724  | 67983835  | KMT5B        | lysine methyltransferase 5B                                        | 13111.1505     |
| 81   | chr9  | 132243912 | 132259501 | LINC00963    | long intergenic non-protein coding RNA 963                         | 13076.0532     |
| 82   | chr21 | 44742178  | 44766101  | SIK1         | salt inducible kinase 1                                            | 13061.958      |
| 83   | chr11 | 65379325  | 65385629  | PCNX3        | pecanex homolog 3 (Drosophila)                                     | 13047.3888     |
| 84   | chr1  | 17221786  | 17241735  | CROCC        | ciliary rootlet coiled-coil, rootletin                             | 12938.9214     |
| 85   | chr11 | 64609021  | 64617015  | CDC42BPG     | CDC42 binding protein kinase gamma                                 | 12852.7532     |

| Rank | chr                   | start     | end       | Gene       | Gene description                                                            | H3K27ac signal |
|------|-----------------------|-----------|-----------|------------|-----------------------------------------------------------------------------|----------------|
| 86   | chr19                 | 2031841   | 2062449   | MKNK2      | MAP kinase interacting serine/threonine kinase 2                            | 12711.5024     |
| 87   | chr11                 | 64642798  | 64647659  | EHD1       | EH domain containing 1                                                      | 12660.9606     |
| 88   | chr11                 | 67230953  | 67237459  | TMEM134    | transmembrane protein 134                                                   | 12628.7966     |
| 89   | chr19                 | 56145447  | 56156388  | ZNF580     | zinc finger protein 580                                                     | 12602.9379     |
| 90   | chr17                 | 79004299  | 79032075  | BAIAP2     | BAI1 associated protein 2                                                   | 12593.6384     |
| 91   | chr19                 | 18526930  | 18544408  | SSBP4      | single stranded DNA binding protein 4                                       | 12538.7172     |
| 92   | chr12                 | 52509288  | 52522382  | ATG101     | autophagy related 101                                                       | 12529.6486     |
| 93   | chr19                 | 52528469  | 52532480  | ZNF614     | zinc finger protein 614                                                     | 12495.4683     |
| 94   | chr8                  | 38613601  | 38628034  | TACC1      | transforming acidic coiled-coil containing protein 1                        | 12478.7718     |
| 95   | chr17                 | 27913332  | 27923471  | ANKRD13B   | ankyrin repeat domain 13B                                                   | 12443.5947     |
| 96   | chr17_gl000205_random | 83881     | 88749     | MGC70870   | C-terminal binding protein 2 pseudogene                                     | 12360.3388     |
| 97   | chr21                 | 46284204  | 46295357  | PTTG1IP    | pituitary tumor-transforming 1 interacting protein                          | 12254.9164     |
| 98   | chr11                 | 63794380  | 63807552  | OTUB1      | OTU deubiquitinase, ubiquitin aldehyde binding 1                            | 12251.2772     |
| 99   | chr21                 | 38337429  | 38353707  | HLCS       | holocarboxylase synthetase                                                  | 12174.3162     |
| 100  | chr11                 | 64050410  | 64056688  | GPR137     | G protein-coupled receptor 137                                              | 12166.1362     |
| 101  | chr5                  | 180668454 | 180676365 | RACK1      | receptor for activated C kinase 1                                           | 11940.8634     |
| 102  | chr6                  | 34110778  | 34123879  | GRM4       | glutamate metabotropic receptor 4                                           | 11903.5686     |
| 103  | chr21                 | 37859448  | 37883781  | CLDN14     | claudin 14                                                                  | 11867.2041     |
| 104  | chr17                 | 77773586  | 77789678  | CBX8       | chromobox 8                                                                 | 11803.482      |
| 105  | chr6                  | 35691347  | 35701262  | FKBP5      | FK506 binding protein 5                                                     | 11793.8925     |
| 106  | chr11                 | 64779686  | 64784641  | ARL2-SNX15 | ARL2-SNX15 readthrough (NMD candidate)                                      | 11788.4405     |
| 107  | chr11                 | 65147109  | 65153282  | SLC25A45   | solute carrier family 25 member 45                                          | 11786.7262     |
| 108  | chr11                 | 125983241 | 125987236 | CDON       | cell adhesion associated, oncogene regulated                                | 11766.4735     |
| 109  | chr5                  | 180233032 | 180239325 | MGAT1      | mannosyl (alpha-1,3-)-glycoprotein beta-1,2-N-acetylglucosaminyltransferase | 11750.2896     |
| 110  | chr5                  | 179708633 | 179730172 | MAPK9      | mitogen-activated protein kinase 9                                          | 11654.7529     |
| 111  | chr6                  | 21586728  | 21596482  | SOX4       | SRY-box 4                                                                   | 11619.9402     |
| 112  | chr17                 | 27050966  | 27056686  | TLCD1      | TLC domain containing 1                                                     | 11616.748      |
| 113  | chr3                  | 128204414 | 128216760 | GATA2      | GATA binding protein 2                                                      | 11575.6096     |
| 114  | chr11                 | 61354115  | 61379070  | RPLP0P2    | ribosomal protein lateral stalk subunit P0 pseudogene 2                     | 11526.7145     |
| 115  | chr15                 | 93351030  | 93365629  | ASB9P1     | ankyrin repeat and SOCS box containing 9 pseudogene 1                       | 11525.9105     |
| 116  | chr3                  | 128052455 | 128069358 | DNAJB8-AS1 | DNAJB8 antisense RNA 1                                                      | 11507.5624     |
| 117  | chr11                 | 114033931 | 114051801 | NNMT       | nicotinamide N-methyltransferase                                            | 11306.349      |
| 118  | chr11                 | 66245219  | 66250195  | DPP3       | dipeptidyl peptidase 3                                                      | 11255.712      |
| 119  | chr17                 | 27068721  | 27076775  | TRAF4      | TNF receptor associated factor 4                                            | 11100.8282     |
| 120  | chr9                  | 110215888 | 110229055 | KLF4       | Kruppel like factor 4                                                       | 11023.4124     |
| 121  | chr11                 | 66484183  | 66497235  | SPTBN2     | spectrin beta, non-erythrocytic 2                                           | 10983.258      |
| 122  | chr1                  | 234735181 | 234749545 | IRF2BP2    | interferon regulatory factor 2 binding protein 2                            | 10972.6596     |
| 123  | chr9                  | 112967371 | 112972267 | C9orf152   | chromosome 9 open reading frame 152                                         | 10889.6832     |
| 124  | chr7                  | 73155596  | 73166074  | ABHD11     | abhydrolase domain containing 11                                            | 10642.5046     |
| 125  | chr1                  | 16993128  | 16995114  | MIR3675    | microRNA 3675                                                               | 10601.0694     |
| 126  | chr8                  | 134306140 | 134312073 | NDRG1      | N-myc downstream regulated 1                                                | 10557.1802     |
| 127  | chr11                 | 66821147  | 66826934  | RHOD       | ras homolog family member D                                                 | 10446.1137     |
| 128  | chr22                 | 23863040  | 23882239  | IGLL1      | immunoglobulin lambda like polypeptide 1                                    | 10430.8167     |
| 129  | chr10                 | 1479463   | 1503329   | ADARB2-AS1 | ADARB2 antisense RNA 1                                                      | 10415.1224     |
| 130  | chr8                  | 126440600 | 126448296 | TRIB1      | tribbles pseudokinase 1                                                     | 10374.9776     |

| Rank | chr   | start     | end       | Gene         | Gene description                                                            | H3K27ac signal |
|------|-------|-----------|-----------|--------------|-----------------------------------------------------------------------------|----------------|
| 131  | chr17 | 26821601  | 26827527  | FOXP1        | forkhead box N1                                                             | 10257.3134     |
| 132  | chr1  | 16967618  | 16973092  | MST1P2       | macrophage stimulating 1 pseudogene 2                                       | 10207.3678     |
| 133  | chr21 | 43012515  | 43022930  | LINC00111    | long intergenic non-protein coding RNA 111                                  | 10155.6665     |
| 134  | chr15 | 89667426  | 89674821  | ABHD2        | abhydrolase domain containing 2                                             | 10148.898      |
| 135  | chr19 | 39327483  | 39343932  | HNRNPL       | heterogeneous nuclear ribonucleoprotein L                                   | 10127.6493     |
| 136  | chr11 | 64803717  | 64811019  | SAC3D1       | SAC3 domain containing 1                                                    | 10100.8566     |
| 137  | chr3  | 13133268  | 13155710  | IQSEC1       | IQ motif and Sec7 domain 1                                                  | 10078.7022     |
| 138  | chr8  | 38589957  | 38594703  | TACC1        | transforming acidic coiled-coil containing protein 1                        | 10071.012      |
| 139  | chr11 | 64331915  | 64349411  | SLC22A11     | solute carrier family 22 member 11                                          | 10016.46       |
| 140  | chr11 | 65323160  | 65329106  | LTBP3        | latent transforming growth factor beta binding protein 3                    | 9980.361       |
| 141  | chr11 | 64214745  | 64218602  | LOC100996455 | uncharacterized LOC100996455                                                | 9966.1023      |
| 142  | chr14 | 105938537 | 105950049 | CRIP2        | cysteine rich protein 2                                                     | 9954.4264      |
| 143  | chr3  | 13020315  | 13037501  | IQSEC1       | IQ motif and Sec7 domain 1                                                  | 9930.0708      |
| 144  | chr3  | 42517344  | 42532653  | VIPR1        | vasoactive intestinal peptide receptor 1                                    | 9927.8865      |
| 145  | chr10 | 46989908  | 46999118  | GPRIN2       | G protein regulated inducer of neurite outgrowth 2                          | 9922.854       |
| 146  | chr17 | 17588438  | 17601761  | RAI1         | retinoic acid induced 1                                                     | 9914.9766      |
| 147  | chr1  | 17065963  | 17068404  | CROCC        | ciliary rootlet coiled-coil, rootletin                                      | 9851.1437      |
| 148  | chr17 | 79301749  | 79321192  | TMEM105      | transmembrane protein 105                                                   | 9812.8821      |
| 149  | chr11 | 67795919  | 67800948  | NDUFS8       | NADH:ubiquinone oxidoreductase core subunit S8                              | 9773.3586      |
| 150  | chr8  | 140866205 | 140870743 | KCNK9        | potassium two pore domain channel subfamily K member 9                      | 9765.3222      |
| 151  | chr8  | 134270645 | 134283504 | NDRG1        | N-myc downstream regulated 1                                                | 9740.6925      |
| 152  | chr21 | 45844396  | 45859508  | TRPM2        | transient receptor potential cation channel subfamily M member 2            | 9710.9712      |
| 153  | chr8  | 101961576 | 101966361 | YWHAZ        | tyrosine 3-monooxygenase/tryptophan 5-monooxygenase activation protein zeta | 9695.8455      |
| 154  | chr21 | 43915001  | 43919567  | RSPH1        | radial spoke head 1 homolog                                                 | 9695.4444      |
| 155  | chr11 | 63436398  | 63440216  | ATL3         | atlastin GTPase 3                                                           | 9683.5934      |
| 156  | chr19 | 18474758  | 18492168  | GDF15        | growth differentiation factor 15                                            | 9660.809       |
| 157  | chr21 | 44156440  | 44170257  | PDE9A        | phosphodiesterase 9A                                                        | 9605.5784      |
| 158  | chr19 | 49374876  | 49380099  | PPP1R15A     | protein phosphatase 1 regulatory subunit 15A                                | 9588.3834      |
| 159  | chr19 | 49989515  | 49994670  | RPL13A       | ribosomal protein L13a                                                      | 9529.533       |
| 160  | chr15 | 101437235 | 101443606 | LRRK1        | leucine rich repeat kinase 1                                                | 9525.2821      |
| 161  | chr6  | 11092891  | 11097320  | SMIM13       | small integral membrane protein 13                                          | 9481.1603      |
| 162  | chr17 | 80839479  | 80849604  | TBCD         | tubulin folding cofactor D                                                  | 9478.0125      |
| 163  | chr2  | 28816988  | 28845590  | PLB1         | phospholipase B1                                                            | 9461.5416      |
| 164  | chr17 | 77804444  | 77818636  | CBX4         | chromobox 4                                                                 | 9444.776       |
| 165  | chr14 | 96341551  | 96355607  | TUNAR        | TCL1 upstream neural differentiation-associated RNA                         | 9430.1704      |
| 166  | chr2  | 238383214 | 238412626 | MLPH         | melanophilin                                                                | 9408.8988      |
| 167  | chr19 | 39644165  | 39659016  | PAK4         | p21 (RAC1) activated kinase 4                                               | 9347.2194      |
| 168  | chr11 | 65554469  | 65563437  | OVOL1        | ovo like transcriptional repressor 1                                        | 9327.6168      |
| 169  | chr17 | 48608664  | 48621626  | EPN3         | epsin 3                                                                     | 9257.4604      |
| 170  | chr17 | 2898194   | 2909418   | OR1D5        | olfactory receptor family 1 subfamily D member 5                            | 9217.1488      |
| 171  | chr19 | 54691901  | 54697094  | TSEN34       | tRNA splicing endonuclease subunit 34                                       | 9150.5853      |
| 172  | chr11 | 65767376  | 65772503  | EIF1AD       | eukaryotic translation initiation factor 1A domain containing               | 9057.8709      |
| 173  | chr19 | 51371281  | 51381819  | KLK2         | kallikrein related peptidase 2                                              | 8986.8064      |
| 174  | chr19 | 39892327  | 39904089  | MIR4530      | microRNA 4530                                                               | 8966.1726      |
| 175  | chr3  | 53177697  | 53191395  | PRKCD        | protein kinase C delta                                                      | 8924.247       |

| Rank | chr   | start     | end       | Gene       | Gene description                                                    | H3K27ac signal |
|------|-------|-----------|-----------|------------|---------------------------------------------------------------------|----------------|
| 176  | chr20 | 35483531  | 35493170  | SOGA1      | suppressor of glucose, autophagy associated 1                       | 8915.1111      |
| 177  | chr8  | 101496126 | 101507818 | ANKRD46    | ankyrin repeat domain 46                                            | 8874.228       |
| 178  | chr17 | 27275516  | 27280446  | PHF12      | PHD finger protein 12                                               | 8871.042       |
| 179  | chr15 | 78497956  | 78514489  | ACSBG1     | acyl-CoA synthetase bubblegum family member 1                       | 8757.5301      |
| 180  | chr3  | 39181715  | 39195081  | CSRNP1     | cysteine and serine rich nuclear protein 1                          | 8683.8902      |
| 181  | chr8  | 144819861 | 144824278 | FAM83H-AS1 | FAM83H antisense RNA 1 (head to head)                               | 8606.5245      |
| 182  | chr1  | 26097307  | 26124207  | SELENON    | selenoprotein N                                                     | 8605.31        |
| 183  | chr19 | 50369054  | 50374630  | PNKP       | polynucleotide kinase 3'-phosphatase                                | 8593.7312      |
| 184  | chr15 | 90578029  | 90591252  | ZNF710     | zinc finger protein 710                                             | 8563.2148      |
| 185  | chr17 | 44336510  | 44345346  | LRR37A     | leucine rich repeat containing 37A                                  | 8556.7824      |
| 186  | chr7  | 5567333   | 5572121   | ACTB       | actin beta                                                          | 8505.4032      |
| 187  | chr2  | 20304509  | 20326763  | LAPTM4A    | lysosomal protein transmembrane 4 alpha                             | 8503.2534      |
| 188  | chr5  | 179321374 | 179324403 | TBC1D9B    | TBC1 domain family member 9B                                        | 8466.055       |
| 189  | chr21 | 37527528  | 37530224  | CBR3-AS1   | CBR3 antisense RNA 1                                                | 8432.5488      |
| 190  | chr2  | 242822829 | 242835580 | RTP5       | receptor transporter protein 5 (putative)                           | 8415.66        |
| 191  | chr21 | 45552607  | 45556825  | C21orf33   | chromosome 21 open reading frame 33                                 | 8415.3318      |
| 192  | chr21 | 43932750  | 43945766  | SLC37A1    | solute carrier family 37 member 1                                   | 8391.4152      |
| 193  | chr10 | 47129112  | 47134994  | HNRNPA1P33 | heterogeneous nuclear ribonucleoprotein A1 pseudogene 33            | 8383.0264      |
| 194  | chr17 | 34888752  | 34892028  | PIGW       | phosphatidylinositol glycan anchor biosynthesis class W             | 8346.2652      |
| 195  | chr20 | 56277669  | 56284322  | PMEPA1     | prostate transmembrane protein, androgen induced 1                  | 8341.5314      |
| 196  | chr13 | 20692204  | 20703142  | GJA3       | gap junction protein alpha 3                                        | 8324.9118      |
| 197  | chr17 | 43660728  | 43664687  | LOC644172  | mitogen-activated protein kinase 8 interacting protein 1 pseudogene | 8293.3132      |
| 198  | chr3  | 193848194 | 193860963 | HES1       | hes family bHLH transcription factor 1                              | 8287.081       |
| 199  | chr1  | 16839053  | 16842919  | CROCCP3    | ciliary rootlet coiled-coil, rootletin pseudogene 3                 | 8216.4098      |
| 200  | chr14 | 100027021 | 100046772 | CCDC85C    | coiled-coil domain containing 85C                                   | 8202.5903      |
| 201  | chr13 | 112726162 | 112728464 | SOX1       | SRY-box 1                                                           | 8200.1844      |
| 202  | chr15 | 75106753  | 75111650  | LMAN1L     | lectin, mannose binding 1 like                                      | 8195.1295      |
| 203  | chr3  | 112989119 | 112994705 | BOC        | BOC cell adhesion associated, oncogene regulated                    | 8062.2738      |
| 204  | chr15 | 90691296  | 90705192  | SEMA4B     | semaphorin 4B                                                       | 8038.836       |
| 205  | chr8  | 142126078 | 142138497 | DENND3     | DENN domain containing 3                                            | 7959.3371      |
| 206  | chr5  | 176727486 | 176732149 | PRELID1    | PRELI domain containing 1                                           | 7854.3572      |
| 207  | chr4  | 77133797  | 77138121  | FAM47E     | family with sequence similarity 47 member E                         | 7787.524       |
| 208  | chr10 | 104177667 | 104183219 | PSD        | pleckstrin and Sec7 domain containing                               | 7748.9264      |

**Online Table VIII: ERG-dependent super-enhancers in HUVEC.** Super-enhancer-associated gene symbols and description. Log<sub>2</sub> fold change (FC) reported from differential analysis comparing ChIP-seq signal in siERG against siCtl in the 1015 super-enhancers identified by H3K27ac enrichment in siCtl. This table spans 14 pages.

| Gene         | Description                                                           | Log <sub>2</sub> FC |
|--------------|-----------------------------------------------------------------------|---------------------|
| PALD1        | phosphatase domain containing, paladin 1                              | -1.85               |
| TSPAN18      | tetraspanin 18                                                        | -1.83               |
| LARS2-AS1    | LARS2 antisense RNA 1                                                 | -1.76               |
| GDPD5        | glycerophosphodiester phosphodiesterase domain containing 5           | -1.71               |
| AQP1         | aquaporin 1 (Colton blood group)                                      | -1.57               |
| TNS1         | tensin 1                                                              | -1.48               |
| N4BP3        | NEDD4 binding protein 3                                               | -1.45               |
| PITRM1       | pitriylsin metalloproteinase 1                                        | -1.45               |
| ARL11        | ADP ribosylation factor like GTPase 11                                | -1.42               |
| CLDN5        | claudin 5                                                             | -1.41               |
| KLF13        | Kruppel like factor 13                                                | -1.36               |
| PCDH12       | protocadherin 12                                                      | -1.33               |
| MYO10        | myosin X                                                              | -1.28               |
| CCR7         | C-C motif chemokine receptor 7                                        | -1.27               |
| C20orf204    | chromosome 20 open reading frame 204                                  | -1.24               |
| IQSEC1       | IQ motif and Sec7 domain 1                                            | -1.23               |
| WSCD1        | WSC domain containing 1                                               | -1.21               |
| RP1L1        | RP1 like 1                                                            | -1.16               |
| LY86         | lymphocyte antigen 86                                                 | -1.14               |
| DLL4         | delta like canonical Notch ligand 4                                   | -1.10               |
| RALB         | RAS like proto-oncogene B                                             | -1.08               |
| FAM192A      | family with sequence similarity 192 member A                          | -1.07               |
| PSMG1        | proteasome assembly chaperone 1                                       | -1.06               |
| NOTCH4       | notch 4                                                               | -1.04               |
| LDB2         | LIM domain binding 2                                                  | -1.02               |
| MYBBP1A      | MYB binding protein 1a                                                | -1.01               |
| VPS53        | VPS53, GARP complex subunit                                           | -0.99               |
| MTMR9LP      | myotubularin related protein 9-like, pseudogene                       | -0.97               |
| NRARP        | NOTCH regulated ankyrin repeat protein                                | -0.96               |
| SOX18        | SRY-box 18                                                            | -0.93               |
| LINC01968    | long intergenic non-protein coding RNA 1968                           | -0.91               |
| SUN1         | Sad1 and UNC84 domain containing 1                                    | -0.91               |
| MMS19        | MMS19 homolog, cytosolic iron-sulfur assembly component               | -0.90               |
| LOC100128531 | uncharacterized LOC100128531                                          | -0.90               |
| LDLRAP1      | low density lipoprotein receptor adaptor protein 1                    | -0.88               |
| C10orf25     | chromosome 10 open reading frame 25                                   | -0.88               |
| MIR1301      | microRNA 1301                                                         | -0.87               |
| JAM3         | junctional adhesion molecule 3                                        | -0.87               |
| SLC43A3      | solute carrier family 43 member 3                                     | -0.85               |
| MIR4761      | microRNA 4761                                                         | -0.85               |
| TAOK2        | TAO kinase 2                                                          | -0.84               |
| CYB561       | cytochrome b561                                                       | -0.83               |
| SPRY4        | sprouty RTK signaling antagonist 4                                    | -0.82               |
| C19orf54     | chromosome 19 open reading frame 54                                   | -0.82               |
| CAMK2B       | calcium/calmodulin dependent protein kinase II beta                   | -0.81               |
| LINC01558    | long intergenic non-protein coding RNA 1558                           | -0.80               |
| ETS1         | ETS proto-oncogene 1, transcription factor                            | -0.80               |
| LXN          | latexin                                                               | -0.78               |
| ADGRF5       | adhesion G protein-coupled receptor F5                                | -0.78               |
| TSEN54       | tRNA splicing endonuclease subunit 54                                 | -0.78               |
| TECPR1       | tectonin beta-propeller repeat containing 1                           | -0.77               |
| CYFIP1       | cytoplasmic FMR1 interacting protein 1                                | -0.77               |
| IFT122       | intraflagellar transport 122                                          | -0.77               |
| GIMAP8       | GTPase, IMAP family member 8                                          | -0.77               |
| FAM53B       | family with sequence similarity 53 member B                           | -0.77               |
| ARHGAP27     | Rho GTPase activating protein 27                                      | -0.77               |
| GGA3         | golgi associated, gamma adaptin ear containing, ARF binding protein 3 | -0.76               |
| AFAP1L1      | actin filament associated protein 1 like 1                            | -0.75               |
| DYSF         | dysferlin                                                             | -0.74               |
| ANGPT2       | angiopoietin 2                                                        | -0.74               |
| SMNDC1       | survival motor neuron domain containing 1                             | -0.74               |
| MGMT         | O-6-methylguanine-DNA methyltransferase                               | -0.74               |
| SLC27A3      | solute carrier family 27 member 3                                     | -0.73               |
| SPRY1        | sprouty RTK signaling antagonist 1                                    | -0.73               |



|           |                                                                          |       |
|-----------|--------------------------------------------------------------------------|-------|
| PDE2A     | phosphodiesterase 2A                                                     | -0.73 |
| SEC14L1   | SEC14 like lipid binding 1                                               | -0.73 |
| CCDC85C   | coiled-coil domain containing 85C                                        | -0.72 |
| SEC14L1   | SEC14 like lipid binding 1                                               | -0.72 |
| ADORA2A   | adenosine A2a receptor                                                   | -0.72 |
| ADGRG1    | adhesion G protein-coupled receptor G1                                   | -0.71 |
| CEP68     | centrosomal protein 68                                                   | -0.70 |
| PPP1R16B  | protein phosphatase 1 regulatory subunit 16B                             | -0.70 |
| PDGFB     | platelet derived growth factor subunit B                                 | -0.70 |
| MIR4711   | microRNA 4711                                                            | -0.70 |
| GSEC      | G-quadruplex forming sequence containing lncRNA                          | -0.70 |
| CD34      | CD34 molecule                                                            | -0.69 |
| EFCC1     | EF-hand and coiled-coil domain containing 1                              | -0.69 |
| TMEM204   | transmembrane protein 204                                                | -0.69 |
| MYO18A    | myosin XVIIIa                                                            | -0.69 |
| NID1      | nidogen 1                                                                | -0.68 |
| PXDN      | peroxidasin                                                              | -0.68 |
| ZNF366    | zinc finger protein 366                                                  | -0.68 |
| ANKS1A    | ankyrin repeat and sterile alpha motif domain containing 1A              | -0.68 |
| RAPGEF1   | Rap guanine nucleotide exchange factor 1                                 | -0.67 |
| IQCK      | IQ motif containing K                                                    | -0.67 |
| ADARB1    | adenosine deaminase, RNA specific B1                                     | -0.67 |
| GRB10     | growth factor receptor bound protein 10                                  | -0.66 |
| PIM3      | Pim-3 proto-oncogene, serine/threonine kinase                            | -0.66 |
| ITPKB     | inositol-trisphosphate 3-kinase B                                        | -0.65 |
| PODXL     | podocalyxin like                                                         | -0.65 |
| ARHGAP12  | Rho GTPase activating protein 12                                         | -0.65 |
| LINC00926 | long intergenic non-protein coding RNA 926                               | -0.65 |
| SEC14L1   | SEC14 like lipid binding 1                                               | -0.64 |
| STK10     | serine/threonine kinase 10                                               | -0.62 |
| SOCS3     | suppressor of cytokine signaling 3                                       | -0.61 |
| ARHGEF7   | Rho guanine nucleotide exchange factor 7                                 | -0.60 |
| VASH1     | vasohibin 1                                                              | -0.60 |
| RDX       | radixin                                                                  | -0.59 |
| HMG20A    | high mobility group 20A                                                  | -0.59 |
| LINC00895 | long intergenic non-protein coding RNA 895                               | -0.59 |
| JAK1      | Janus kinase 1                                                           | -0.58 |
| GPR146    | G protein-coupled receptor 146                                           | -0.58 |
| NUDT7     | nudix hydrolase 7                                                        | -0.58 |
| MIR4720   | microRNA 4720                                                            | -0.58 |
| HOMER3    | homer scaffolding protein 3                                              | -0.58 |
| SLC19A1   | solute carrier family 19 member 1                                        | -0.58 |
| STS       | steroid sulfatase                                                        | -0.58 |
| PKD1L1    | polycystin 1 like 1, transient receptor potential channel interacting    | -0.58 |
| PREX1     | phosphatidylinositol-3,4,5-trisphosphate dependent Rac exchange factor 1 | -0.58 |
| AP1B1     | adaptor related protein complex 1 beta 1 subunit                         | -0.58 |
| RNU6-34P  | RNA, U6 small nuclear 34, pseudogene                                     | -0.57 |
| EPAS1     | endothelial PAS domain protein 1                                         | -0.56 |
| PITRM1    | pitrilysin metalloproteinase 1                                           | -0.56 |
| CMKLR1    | chemerin chemokine-like receptor 1                                       | -0.56 |
| PPM1F     | protein phosphatase, Mg <sup>2+</sup> /Mn <sup>2+</sup> dependent 1F     | -0.56 |
| TIE1      | tyrosine kinase with immunoglobulin like and EGF like domains 1          | -0.55 |
| DLX2      | distal-less homeobox 2                                                   | -0.55 |
| MIR5193   | microRNA 5193                                                            | -0.55 |
| MIR4296   | microRNA 4296                                                            | -0.55 |
| CALM1     | calmodulin 1                                                             | -0.55 |
| PPP1R13B  | protein phosphatase 1 regulatory subunit 13B                             | -0.55 |
| GALNT15   | polypeptide N-acetylgalactosaminyltransferase 15                         | -0.54 |
| NDST1     | N-deacetylase and N-sulfotransferase 1                                   | -0.54 |
| AGFG2     | ArfGAP with FG repeats 2                                                 | -0.54 |
| KCNJ1     | potassium voltage-gated channel subfamily J member 1                     | -0.53 |
| WARS      | tryptophanyl-tRNA synthetase                                             | -0.53 |
| GCHFR     | GTP cyclohydrolase I feedback regulator                                  | -0.53 |
| EFNA1     | ephrin A1                                                                | -0.52 |
| FAM78A    | family with sequence similarity 78 member A                              | -0.52 |
| PPCDC     | phosphopantothienoylcysteine decarboxylase                               | -0.52 |
| FGD5      | FYVE, RhoGEF and PH domain containing 5                                  | -0.51 |
| ITPR3     | inositol 1,4,5-trisphosphate receptor type 3                             | -0.51 |
| SOX17     | SRY-box 17                                                               | -0.51 |
| ABHD2     | abhydrolase domain containing 2                                          | -0.51 |
| WSCD1     | WSC domain containing 1                                                  | -0.51 |
| PRKD2     | protein kinase D2                                                        | -0.51 |

|            |                                                                            |       |
|------------|----------------------------------------------------------------------------|-------|
| CELA3B     | chymotrypsin like elastase family member 3B                                | -0.50 |
| POLR1A     | RNA polymerase I subunit A                                                 | -0.50 |
| LRRFIP1    | LRR binding FLII interacting protein 1                                     | -0.50 |
| NNMT       | nicotinamide N-methyltransferase                                           | -0.50 |
| SLC9A3R2   | SLC9A3 regulator 2                                                         | -0.50 |
| DLGAP4     | DLG associated protein 4                                                   | -0.50 |
| NDUFS2     | NADH:ubiquinone oxidoreductase core subunit S2                             | -0.49 |
| GPR17      | G protein-coupled receptor 17                                              | -0.49 |
| LINC02363  | long intergenic non-protein coding RNA 2363                                | -0.49 |
| SH2D3C     | SH2 domain containing 3C                                                   | -0.49 |
| FADS3      | fatty acid desaturase 3                                                    | -0.49 |
| LRRC32     | leucine rich repeat containing 32                                          | -0.49 |
| SEC14L1    | SEC14 like lipid binding 1                                                 | -0.49 |
| DEPP1      | DEPP1, autophagy regulator                                                 | -0.48 |
| TNFRSF1B   | TNF receptor superfamily member 1B                                         | -0.46 |
| TMEM140    | transmembrane protein 140                                                  | -0.46 |
| DOCK9      | dedicator of cytokinesis 9                                                 | -0.46 |
| PGF        | placental growth factor                                                    | -0.46 |
| ARHGAP27P1 | Rho GTPase activating protein 27 pseudogene 1                              | -0.46 |
| CALCRL     | calcitonin receptor like receptor                                          | -0.45 |
| UBAC1      | UBA domain containing 1                                                    | -0.45 |
| CDK2AP1    | cyclin dependent kinase 2 associated protein 1                             | -0.45 |
| SPTLC2     | serine palmitoyltransferase long chain base subunit 2                      | -0.45 |
| DOCK6      | dedicator of cytokinesis 6                                                 | -0.45 |
| RALGAPA2   | Ral GTPase activating protein catalytic alpha subunit 2                    | -0.45 |
| ABCA4      | ATP binding cassette subfamily A member 4                                  | -0.44 |
| PIK3C2B    | phosphatidylinositol-4-phosphate 3-kinase catalytic subunit type 2 beta    | -0.44 |
| MFSD4A     | major facilitator superfamily domain containing 4A                         | -0.44 |
| HEIH       | hepatocellular carcinoma up-regulated EZH2-associated long non-coding RNA  | -0.44 |
| GSN        | gelsolin                                                                   | -0.44 |
| TSPAN15    | tetraspanin 15                                                             | -0.44 |
| MCAM       | melanoma cell adhesion molecule                                            | -0.44 |
| HDAC7      | histone deacetylase 7                                                      | -0.44 |
| LTA4H      | leukotriene A4 hydrolase                                                   | -0.44 |
| NUDT14     | nudix hydrolase 14                                                         | -0.44 |
| CD93       | CD93 molecule                                                              | -0.44 |
| BCOR       | BCL6 corepressor                                                           | -0.44 |
| HAO        | 3-hydroxyanthranilate 3,4-dioxygenase                                      | -0.43 |
| PRKAR1B    | protein kinase cAMP-dependent type I regulatory subunit beta               | -0.43 |
| PML        | promyelocytic leukemia                                                     | -0.43 |
| TBCD       | tubulin folding cofactor D                                                 | -0.43 |
| MIR4748    | microRNA 4748                                                              | -0.43 |
| PGLS       | 6-phosphogluconolactonase                                                  | -0.43 |
| BIN1       | bridging integrator 1                                                      | -0.42 |
| IKBKB      | inhibitor of nuclear factor kappa B kinase subunit beta                    | -0.42 |
| EEF1G      | eukaryotic translation elongation factor 1 gamma                           | -0.42 |
| SEMA6B     | semaphorin 6B                                                              | -0.42 |
| TNFAIP8L1  | TNF alpha induced protein 8 like 1                                         | -0.42 |
| RPS10P7    | ribosomal protein S10 pseudogene 7                                         | -0.41 |
| CCDC12     | coiled-coil domain containing 12                                           | -0.41 |
| FAM43A     | family with sequence similarity 43 member A                                | -0.41 |
| GIMAP4     | GTPase, IMAP family member 4                                               | -0.41 |
| EGFL7      | EGF like domain multiple 7                                                 | -0.41 |
| CAVIN3     | caveolae associated protein 3                                              | -0.41 |
| RAPGEF3    | Rap guanine nucleotide exchange factor 3                                   | -0.41 |
| HERC1      | HECT and RLD domain containing E3 ubiquitin protein ligase family member 1 | -0.41 |
| EEF2K      | eukaryotic elongation factor 2 kinase                                      | -0.41 |
| ARHGEF15   | Rho guanine nucleotide exchange factor 15                                  | -0.41 |
| GNB1L      | G protein subunit beta 1 like                                              | -0.41 |
| KIAA1671   | KIAA1671                                                                   | -0.41 |
| DCST1-AS1  | DCST1 antisense RNA 1                                                      | -0.40 |
| SH3TC1     | SH3 domain and tetratricopeptide repeats 1                                 | -0.40 |
| HBEGF      | heparin binding EGF like growth factor                                     | -0.40 |
| MIR4673    | microRNA 4673                                                              | -0.40 |
| LYZL2      | lysozyme like 2                                                            | -0.40 |
| CTBP2      | C-terminal binding protein 2                                               | -0.40 |
| ARHGEF17   | Rho guanine nucleotide exchange factor 17                                  | -0.40 |
| ARRB1      | arrestin beta 1                                                            | -0.40 |
| HDAC5      | histone deacetylase 5                                                      | -0.40 |
| RHBDF2     | rhomboid 5 homolog 2                                                       | -0.40 |
| SMTN       | smoothelin                                                                 | -0.40 |
| ANKRD55    | ankyrin repeat domain 55                                                   | -0.39 |

|              |                                                                          |       |
|--------------|--------------------------------------------------------------------------|-------|
| RGS3         | regulator of G protein signaling 3                                       | -0.39 |
| FRY          | FRY microtubule binding protein                                          | -0.39 |
| MIR3183      | microRNA 3183                                                            | -0.39 |
| MIR4729      | microRNA 4729                                                            | -0.39 |
| GPR3         | G protein-coupled receptor 3                                             | -0.38 |
| CDC42EP3     | CDC42 effector protein 3                                                 | -0.38 |
| ZFP36L2      | ZFP36 ring finger protein like 2                                         | -0.38 |
| RAB11FIP5    | RAB11 family interacting protein 5                                       | -0.38 |
| MIR4266      | microRNA 4266                                                            | -0.38 |
| RPL32P3      | ribosomal protein L32 pseudogene 3                                       | -0.38 |
| PCDH1        | protocadherin 1                                                          | -0.38 |
| LRRC32       | leucine rich repeat containing 32                                        | -0.38 |
| ARSA         | arylsulfatase A                                                          | -0.38 |
| MAST4        | microtubule associated serine/threonine kinase family member 4           | -0.37 |
| RPL35        | ribosomal protein L35                                                    | -0.37 |
| PGAM1P5      | phosphoglycerate mutase 1 pseudogene 5                                   | -0.37 |
| PIF1         | PIF1 5'-to-3' DNA helicase                                               | -0.37 |
| ZNF710       | zinc finger protein 710                                                  | -0.37 |
| HSPB9        | heat shock protein family B (small) member 9                             | -0.37 |
| GNGT2        | G protein subunit gamma transducin 2                                     | -0.37 |
| ABHD17A      | abhydrolase domain containing 17A                                        | -0.37 |
| ABHD16B      | abhydrolase domain containing 16B                                        | -0.37 |
| STARD8       | StAR related lipid transfer domain containing 8                          | -0.37 |
| GIPC2        | GIPC PDZ domain containing family member 2                               | -0.36 |
| LMNA         | lamin A/C                                                                | -0.36 |
| TNS1         | tensin 1                                                                 | -0.36 |
| DKFZp451B082 | uncharacterized LOC401282                                                | -0.36 |
| PODXL        | podocalyxin like                                                         | -0.36 |
| AGAP3        | ArfGAP with GTPase domain, ankyrin repeat and PH domain 3                | -0.36 |
| PCNX3        | pecanex homolog 3                                                        | -0.36 |
| CDKN1B       | cyclin dependent kinase inhibitor 1B                                     | -0.36 |
| FLJ21408     | uncharacterized LOC400512                                                | -0.36 |
| IGFBP4       | insulin like growth factor binding protein 4                             | -0.36 |
| ICAM2        | intercellular adhesion molecule 2                                        | -0.36 |
| LRRFIP1      | LRR binding FLII interacting protein 1                                   | -0.34 |
| TPRG1L       | tumor protein p63 regulated 1 like                                       | -0.33 |
| LINC01126    | long intergenic non-protein coding RNA 1126                              | -0.33 |
| SH3BP5       | SH3 domain binding protein 5                                             | -0.33 |
| HLA-E        | major histocompatibility complex, class I, E                             | -0.33 |
| EXD3         | exonuclease 3'-5' domain containing 3                                    | -0.33 |
| BMF          | Bcl2 modifying factor                                                    | -0.33 |
| MAPKBP1      | mitogen-activated protein kinase binding protein 1                       | -0.33 |
| PIGV         | phosphatidylinositol glycan anchor biosynthesis class V                  | -0.32 |
| TGFBR2       | transforming growth factor beta receptor 2                               | -0.32 |
| GFOD1        | glucose-fructose oxidoreductase domain containing 1                      | -0.32 |
| LOC254896    | uncharacterized LOC254896                                                | -0.32 |
| EGFL7        | EGF like domain multiple 7                                               | -0.32 |
| CHSY1        | chondroitin sulfate synthase 1                                           | -0.32 |
| RIPOR1       | RHO family interacting cell polarization regulator 1                     | -0.32 |
| SUMO1P1      | SUMO1 pseudogene 1                                                       | -0.32 |
| ELOVL1       | ELOVL fatty acid elongase 1                                              | -0.31 |
| INPP5D       | inositol polyphosphate-5-phosphatase D                                   | -0.31 |
| APBB2        | amyloid beta precursor protein binding family B member 2                 | -0.31 |
| NOTCH4       | notch 4                                                                  | -0.31 |
| FKBP5        | FK506 binding protein 5                                                  | -0.31 |
| RALGDS       | ral guanine nucleotide dissociation stimulator                           | -0.31 |
| KLF6         | Kruppel like factor 6                                                    | -0.31 |
| TRAF7        | TNF receptor associated factor 7                                         | -0.31 |
| BANP         | BTG3 associated nuclear protein                                          | -0.31 |
| MIR4745      | microRNA 4745                                                            | -0.31 |
| LAMA5        | laminin subunit alpha 5                                                  | -0.31 |
| NA           | NA                                                                       | -0.30 |
| SLFNL1-AS1   | SLFNL1 antisense RNA 1                                                   | -0.30 |
| DNASE1L3     | deoxyribonuclease 1 like 3                                               | -0.30 |
| GBA2         | glucosylceramidase beta 2                                                | -0.30 |
| FOXO1        | forkhead box O1                                                          | -0.30 |
| KAT7         | lysine acetyltransferase 7                                               | -0.30 |
| CDC25B       | cell division cycle 25B                                                  | -0.30 |
| PREX1        | phosphatidylinositol-3,4,5-trisphosphate dependent Rac exchange factor 1 | -0.30 |
| FAAP20       | Fanconi anemia core complex associated protein 20                        | -0.29 |
| SOX13        | SRY-box 13                                                               | -0.29 |
| GNAI2        | G protein subunit alpha i2                                               | -0.29 |

|             |                                                                      |       |
|-------------|----------------------------------------------------------------------|-------|
| IQCJ-SCHIP1 | IQCJ-SCHIP1 readthrough                                              | -0.29 |
| NT5E        | 5'-nucleotidase ecto                                                 | -0.29 |
| KLF9        | Kruppel like factor 9                                                | -0.29 |
| DUSP5       | dual specificity phosphatase 5                                       | -0.29 |
| MIR4688     | microRNA 4688                                                        | -0.29 |
| FMNL3       | formin like 3                                                        | -0.29 |
| WDFY1       | WD repeat and FYVE domain containing 1                               | -0.28 |
| FAM124B     | family with sequence similarity 124 member B                         | -0.28 |
| TMEM173     | transmembrane protein 173                                            | -0.28 |
| DENND3      | DENN domain containing 3                                             | -0.28 |
| SERPINH1    | serpin family H member 1                                             | -0.28 |
| ISG20       | interferon stimulated exonuclease gene 20                            | -0.28 |
| CMIP        | c-Maf inducing protein                                               | -0.28 |
| ALOX12-AS1  | ALOX12 antisense RNA 1                                               | -0.28 |
| JUP         | junction plakoglobin                                                 | -0.28 |
| KLF2        | Kruppel like factor 2                                                | -0.28 |
| FAM129C     | family with sequence similarity 129 member C                         | -0.28 |
| MIR3194     | microRNA 3194                                                        | -0.28 |
| SLC9A1      | solute carrier family 9 member A1                                    | -0.26 |
| TDRD10      | tudor domain containing 10                                           | -0.26 |
| TNR         | tenascin R                                                           | -0.26 |
| HEG1        | heart development protein with EGF like domains 1                    | -0.26 |
| RAI14       | retinoic acid induced 14                                             | -0.26 |
| FSCN1       | fascin actin-bundling protein 1                                      | -0.26 |
| EFCAB1      | EF-hand calcium binding domain 1                                     | -0.26 |
| FAM213A     | family with sequence similarity 213 member A                         | -0.26 |
| UVRAG       | UV radiation resistance associated                                   | -0.26 |
| ANKRD11     | ankyrin repeat domain 11                                             | -0.26 |
| ATP8B1      | ATPase phospholipid transporting 8B1                                 | -0.26 |
| COQ8B       | coenzyme Q8B                                                         | -0.26 |
| ADA         | adenosine deaminase                                                  | -0.26 |
| PLEKHG5     | pleckstrin homology and RhoGEF domain containing G5                  | -0.25 |
| ATP2B4      | ATPase plasma membrane Ca <sup>2+</sup> transporting 4               | -0.25 |
| ERGIC1      | endoplasmic reticulum-golgi intermediate compartment 1               | -0.25 |
| PPP1R35     | protein phosphatase 1 regulatory subunit 35                          | -0.25 |
| DAB2IP      | DAB2 interacting protein                                             | -0.25 |
| ADM         | adrenomedullin                                                       | -0.25 |
| TXNRD2      | thioredoxin reductase 2                                              | -0.25 |
| HSPG2       | heparan sulfate proteoglycan 2                                       | -0.24 |
| RXFP4       | relaxin/insulin like family peptide receptor 4                       | -0.24 |
| NES         | nestin                                                               | -0.24 |
| GPX1        | glutathione peroxidase 1                                             | -0.24 |
| ZNF366      | zinc finger protein 366                                              | -0.24 |
| CSNK1A1     | casein kinase 1 alpha 1                                              | -0.24 |
| RNF144B     | ring finger protein 144B                                             | -0.24 |
| ANKRD13D    | ankyrin repeat domain 13D                                            | -0.24 |
| PHLDA1      | pleckstrin homology like domain family A member 1                    | -0.24 |
| ELK3        | ELK3, ETS transcription factor                                       | -0.24 |
| CAVIN1      | caveolae associated protein 1                                        | -0.24 |
| LSM4        | LSM4 homolog, U6 small nuclear RNA and mRNA degradation associated   | -0.24 |
| ASAP2       | ArfGAP with SH3 domain, ankyrin repeat and PH domain 2               | -0.23 |
| VGLL4       | vestigial like family member 4                                       | -0.23 |
| SEMA3F      | semaphorin 3F                                                        | -0.23 |
| TNK2        | tyrosine kinase non receptor 2                                       | -0.23 |
| LEMD2       | LEM domain containing 2                                              | -0.23 |
| PDE7B       | phosphodiesterase 7B                                                 | -0.23 |
| CLDN15      | claudin 15                                                           | -0.23 |
| CAV1        | caveolin 1                                                           | -0.23 |
| TRIB1       | tribbles pseudokinase 1                                              | -0.23 |
| FAM69B      | family with sequence similarity 69 member B                          | -0.23 |
| LZTS2       | leucine zipper tumor suppressor 2                                    | -0.23 |
| GRASP       | general receptor for phosphoinositides 1 associated scaffold protein | -0.23 |
| TNS2        | tensin 2                                                             | -0.23 |
| DAD1        | defender against cell death 1                                        | -0.23 |
| EHD4        | EH domain containing 4                                               | -0.23 |
| GNA15       | G protein subunit alpha 15                                           | -0.23 |
| ELF4        | E74 like ETS transcription factor 4                                  | -0.23 |
| CLCN6       | chloride voltage-gated channel 6                                     | -0.21 |
| RHOC        | ras homolog family member C                                          | -0.21 |
| S100A10     | S100 calcium binding protein A10                                     | -0.21 |
| SRGAP2      | SLIT-ROBO Rho GTPase activating protein 2                            | -0.21 |
| HOXD-AS2    | HOXD cluster antisense RNA 2                                         | -0.21 |

|             |                                                                          |       |
|-------------|--------------------------------------------------------------------------|-------|
| SASH1       | SAM and SH3 domain containing 1                                          | -0.21 |
| ZNF277      | zinc finger protein 277                                                  | -0.21 |
| PREX2       | phosphatidylinositol-3,4,5-trisphosphate dependent Rac exchange factor 2 | -0.21 |
| RAPGEF1     | Rap guanine nucleotide exchange factor 1                                 | -0.21 |
| TOR4A       | torsin family 4 member A                                                 | -0.21 |
| WSB1        | WD repeat and SOCS box containing 1                                      | -0.21 |
| EGLN2       | egl-9 family hypoxia inducible factor 2                                  | -0.21 |
| LINC00313   | long intergenic non-protein coding RNA 313                               | -0.21 |
| CMTM7       | CKLF like MARVEL transmembrane domain containing 7                       | -0.20 |
| TMEM14EP    | transmembrane protein 14E, pseudogene                                    | -0.20 |
| LHFPL3-AS2  | LHFPL3 antisense RNA 2                                                   | -0.20 |
| INS-IGF2    | INS-IGF2 readthrough                                                     | -0.20 |
| RELT        | RELT, TNF receptor                                                       | -0.20 |
| HIP1R       | huntingtin interacting protein 1 related                                 | -0.20 |
| MTMR10      | myotubularin related protein 10                                          | -0.20 |
| CANT1       | calcium activated nucleotidase 1                                         | -0.20 |
| MKMK2       | MAP kinase interacting serine/threonine kinase 2                         | -0.20 |
| GADD45B     | growth arrest and DNA damage inducible beta                              | -0.20 |
| LENG8       | leukocyte receptor cluster member 8                                      | -0.20 |
| PLCG1       | phospholipase C gamma 1                                                  | -0.20 |
| VPS13D      | vacuolar protein sorting 13 homolog D                                    | -0.19 |
| CLIC4       | chloride intracellular channel 4                                         | -0.19 |
| PCBP1-AS1   | PCBP1 antisense RNA 1                                                    | -0.19 |
| VGLL4       | vestigial like family member 4                                           | -0.19 |
| TACC3       | transforming acidic coiled-coil containing protein 3                     | -0.19 |
| FAM198B     | family with sequence similarity 198 member B                             | -0.19 |
| MSH5-SAPCD1 | MSH5-SAPCD1 readthrough (NMD candidate)                                  | -0.19 |
| SHB         | SH2 domain containing adaptor protein B                                  | -0.19 |
| MIR126      | microRNA 126                                                             | -0.19 |
| JCAD        | junctional cadherin 5 associated                                         | -0.19 |
| MIR548Z     | microRNA 548z                                                            | -0.19 |
| IL4R        | interleukin 4 receptor                                                   | -0.19 |
| UNC13D      | unc-13 homolog D                                                         | -0.19 |
| CIC         | capicua transcriptional repressor                                        | -0.19 |
| RIN2        | Ras and Rab interactor 2                                                 | -0.19 |
| TAL1        | TAL bHLH transcription factor 1, erythroid differentiation factor        | -0.18 |
| EPAS1       | endothelial PAS domain protein 1                                         | -0.18 |
| LINC01816   | long intergenic non-protein coding RNA 1816                              | -0.18 |
| MIR3692     | microRNA 3692                                                            | -0.18 |
| TNRC18      | trinucleotide repeat containing 18                                       | -0.18 |
| TACC2       | transforming acidic coiled-coil containing protein 2                     | -0.18 |
| NEAT1       | nuclear paraspeckle assembly transcript 1 (non-protein coding)           | -0.18 |
| FGD4        | FYVE, RhoGEF and PH domain containing 4                                  | -0.18 |
| CMIP        | c-Maf inducing protein                                                   | -0.18 |
| GRAP        | GRB2-related adaptor protein                                             | -0.18 |
| ARHGAP23    | Rho GTPase activating protein 23                                         | -0.18 |
| SAMD14      | sterile alpha motif domain containing 14                                 | -0.18 |
| SIPA1L3     | signal induced proliferation associated 1 like 3                         | -0.18 |
| S100A16     | S100 calcium binding protein A16                                         | -0.16 |
| NUAK2       | NUAK family kinase 2                                                     | -0.16 |
| EPAS1       | endothelial PAS domain protein 1                                         | -0.16 |
| SSFA2       | sperm specific antigen 2                                                 | -0.16 |
| SH3BP2      | SH3 domain binding protein 2                                             | -0.16 |
| NRM         | nurim                                                                    | -0.16 |
| CD109       | CD109 molecule                                                           | -0.16 |
| RPS6KA2     | ribosomal protein S6 kinase A2                                           | -0.16 |
| SLC25A25    | solute carrier family 25 member 25                                       | -0.16 |
| GRK5        | G protein-coupled receptor kinase 5                                      | -0.16 |
| BCAT1       | branched chain amino acid transaminase 1                                 | -0.16 |
| ATP11A      | ATPase phospholipid transporting 11A                                     | -0.16 |
| CLEC14A     | C-type lectin domain containing 14A                                      | -0.16 |
| MTA1        | metastasis associated 1                                                  | -0.16 |
| HOXB3       | homeobox B3                                                              | -0.16 |
| TRIM47      | tripartite motif containing 47                                           | -0.16 |
| NOP53       | NOP53 ribosome biogenesis factor                                         | -0.16 |
| TRIB3       | tribbles pseudokinase 3                                                  | -0.16 |
| EPAS1       | endothelial PAS domain protein 1                                         | -0.15 |
| NPAS2       | neuronal PAS domain protein 2                                            | -0.15 |
| H1FOO       | H1 histone family member O oocyte specific                               | -0.15 |
| PTPA        | protein phosphatase 2 phosphatase activator                              | -0.15 |
| CCDC85B     | coiled-coil domain containing 85B                                        | -0.15 |
| SLC35F2     | solute carrier family 35 member F2                                       | -0.15 |

|              |                                                                             |       |
|--------------|-----------------------------------------------------------------------------|-------|
| LATS2        | large tumor suppressor kinase 2                                             | -0.15 |
| COL4A1       | collagen type IV alpha 1 chain                                              | -0.15 |
| IRF2BPL      | interferon regulatory factor 2 binding protein like                         | -0.15 |
| MYZAP        | myocardial zonula adherens protein                                          | -0.15 |
| LIG1         | DNA ligase 1                                                                | -0.15 |
| CASTOR1      | cytosolic arginine sensor for mTORC1 subunit 1                              | -0.15 |
| C1QTNF6      | C1q and TNF related 6                                                       | -0.15 |
| PLA2G6       | phospholipase A2 group VI                                                   | -0.15 |
| TMSB4X       | thymosin beta 4, X-linked                                                   | -0.15 |
| F11R         | F11 receptor                                                                | -0.14 |
| EPAS1        | endothelial PAS domain protein 1                                            | -0.14 |
| MIR4435-1    | microRNA 4435-1                                                             | -0.14 |
| IGF2BP2-AS1  | IGF2BP2 antisense RNA 1                                                     | -0.14 |
| MIR4645      | microRNA 4645                                                               | -0.14 |
| GFOD1        | glucose-fructose oxidoreductase domain containing 1                         | -0.14 |
| MIR4648      | microRNA 4648                                                               | -0.14 |
| SOX7         | SRY-box 7                                                                   | -0.14 |
| SNCG         | synuclein gamma                                                             | -0.14 |
| TSSC4        | tumor suppressing subtransferable candidate 4                               | -0.14 |
| FADS2        | fatty acid desaturase 2                                                     | -0.14 |
| MALAT1       | metastasis associated lung adenocarcinoma transcript 1 (non-protein coding) | -0.14 |
| MIR4489      | microRNA 4489                                                               | -0.14 |
| SETD1B       | SET domain containing 1B                                                    | -0.14 |
| PRKCH        | protein kinase C eta                                                        | -0.14 |
| PRKCH        | protein kinase C eta                                                        | -0.14 |
| ARHGAP17     | Rho GTPase activating protein 17                                            | -0.14 |
| MTSS1L       | MTSS1L, I-BAR domain containing                                             | -0.14 |
| TRIM25       | tripartite motif containing 25                                              | -0.14 |
| NFATC1       | nuclear factor of activated T-cells 1                                       | -0.14 |
| STX10        | syntaxin 10                                                                 | -0.14 |
| MIR3190      | microRNA 3190                                                               | -0.14 |
| LINC00656    | long intergenic non-protein coding RNA 656                                  | -0.14 |
| MIR4258      | microRNA 4258                                                               | -0.12 |
| MEF2D        | myocyte enhancer factor 2D                                                  | -0.12 |
| FRMD4B       | FERM domain containing 4B                                                   | -0.12 |
| TMEM44       | transmembrane protein 44                                                    | -0.12 |
| MIR143       | microRNA 143                                                                | -0.12 |
| SPARC        | secreted protein acidic and cysteine rich                                   | -0.12 |
| MIR1260B     | microRNA 1260b                                                              | -0.12 |
| MIR4740      | microRNA 4740                                                               | -0.12 |
| LOC642852    | uncharacterized LOC642852                                                   | -0.12 |
| MSN          | moesin                                                                      | -0.12 |
| HPCAL1       | hippocalcin like 1                                                          | -0.11 |
| VAMP5        | vesicle associated membrane protein 5                                       | -0.11 |
| PHLDB2       | pleckstrin homology like domain family B member 2                           | -0.11 |
| RGS12        | regulator of G protein signaling 12                                         | -0.11 |
| WRNIP1       | Werner helicase interacting protein 1                                       | -0.11 |
| BRI3         | brain protein I3                                                            | -0.11 |
| SPAAR        | small regulatory polypeptide of amino acid response                         | -0.11 |
| AQP7P1       | aquaporin 7 pseudogene 1                                                    | -0.11 |
| ITGA11       | integrin subunit alpha 11                                                   | -0.11 |
| LOC646938    | TBC1 domain family member 2B pseudogene                                     | -0.11 |
| MIR4516      | microRNA 4516                                                               | -0.11 |
| LOC100287036 | uncharacterized LOC100287036                                                | -0.11 |
| CEACAM16     | carcinoembryonic antigen related cell adhesion molecule 16                  | -0.11 |
| GNG11        | G protein subunit gamma 11                                                  | -0.10 |
| SLC25A45     | solute carrier family 25 member 45                                          | -0.10 |
| SH2B3        | SH2B adaptor protein 3                                                      | -0.10 |
| TBC1D2B      | TBC1 domain family member 2B                                                | -0.10 |
| NTAN1        | N-terminal asparagine amidase                                               | -0.10 |
| SCARF1       | scavenger receptor class F member 1                                         | -0.10 |
| SMG6         | SMG6, nonsense mediated mRNA decay factor                                   | -0.10 |
| TIMP2        | TIMP metalloproteinase inhibitor 2                                          | -0.10 |
| TIMP2        | TIMP metalloproteinase inhibitor 2                                          | -0.10 |
| LDLR         | low density lipoprotein receptor                                            | -0.10 |
| PNKP         | polynucleotide kinase 3'-phosphatase                                        | -0.10 |
| MDS2         | myelodysplastic syndrome 2 translocation associated                         | -0.08 |
| TMEM39B      | transmembrane protein 39B                                                   | -0.08 |
| LINC01135    | long intergenic non-protein coding RNA 1135                                 | -0.08 |
| TNS1         | tensin 1                                                                    | -0.08 |
| TRAK1        | trafficking kinesin protein 1                                               | -0.08 |
| FAM198B      | family with sequence similarity 198 member B                                | -0.08 |

|                |                                                        |       |
|----------------|--------------------------------------------------------|-------|
| CXXC5          | CXXC finger protein 5                                  | -0.08 |
| FOXC1          | forkhead box C1                                        | -0.08 |
| EPHB4          | EPH receptor B4                                        | -0.08 |
| LOC100507156   | uncharacterized LOC100507156                           | -0.08 |
| ST3GAL1        | ST3 beta-galactoside alpha-2,3-sialyltransferase 1     | -0.08 |
| MIR541         | microRNA 541                                           | -0.08 |
| CRIP2          | cysteine rich protein 2                                | -0.08 |
| MAP2K3         | mitogen-activated protein kinase 3                     | -0.08 |
| CIRBP          | cold inducible RNA binding protein                     | -0.08 |
| JAG1           | jagged 1                                               | -0.08 |
| PISD           | phosphatidylserine decarboxylase                       | -0.08 |
| PEAR1          | platelet endothelial aggregation receptor 1            | -0.07 |
| LOC148696      | uncharacterized LOC148696                              | -0.07 |
| ARF1           | ADP ribosylation factor 1                              | -0.07 |
| FEZ2           | fasciculation and elongation protein zeta 2            | -0.07 |
| MALL           | mal, T-cell differentiation protein like               | -0.07 |
| MIR1244-2      | microRNA 1244-2                                        | -0.07 |
| LINC00696      | long intergenic non-protein coding RNA 696             | -0.07 |
| TM4SF18        | transmembrane 4 L six family member 18                 | -0.07 |
| BRD2           | bromodomain containing 2                               | -0.07 |
| KMT2E-AS1      | KMT2E antisense RNA 1 (head to head)                   | -0.07 |
| C8orf58        | chromosome 8 open reading frame 58                     | -0.07 |
| AKAP2          | A-kinase anchoring protein 2                           | -0.07 |
| RXRA           | retinoid X receptor alpha                              | -0.07 |
| FES            | FES proto-oncogene, tyrosine kinase                    | -0.07 |
| ST3GAL2        | ST3 beta-galactoside alpha-2,3-sialyltransferase 2     | -0.07 |
| LOC100129617   | uncharacterized LOC100129617                           | -0.07 |
| MSL1           | male specific lethal 1 homolog                         | -0.07 |
| CUEDC1         | CUE domain containing 1                                | -0.07 |
| NFIC           | nuclear factor I C                                     | -0.07 |
| PIP5K1C        | phosphatidylinositol-4-phosphate 5-kinase type 1 gamma | -0.07 |
| NFIX           | nuclear factor I X                                     | -0.07 |
| APP            | amyloid beta precursor protein                         | -0.07 |
| TAGLN2         | transgelin 2                                           | -0.06 |
| LIMD1-AS1      | LIMD1 antisense RNA 1                                  | -0.06 |
| ACTB           | actin beta                                             | -0.06 |
| TNFRSF10D      | TNF receptor superfamily member 10d                    | -0.06 |
| PPP2R2A        | protein phosphatase 2 regulatory subunit Balpha        | -0.06 |
| MRPL15         | mitochondrial ribosomal protein L15                    | -0.06 |
| SH2D4B         | SH2 domain containing 4B                               | -0.06 |
| MIR4681        | microRNA 4681                                          | -0.06 |
| SWAP70         | switching B-cell complex subunit SWAP70                | -0.06 |
| SLC3A2         | solute carrier family 3 member 2                       | -0.06 |
| FZD4           | frizzled class receptor 4                              | -0.06 |
| ANKRD33        | ankyrin repeat domain 33                               | -0.06 |
| MIR5188        | microRNA 5188                                          | -0.06 |
| ZFP36L1        | ZFP36 ring finger protein like 1                       | -0.06 |
| TUBB6          | tubulin beta 6 class V                                 | -0.06 |
| MIR1227        | microRNA 1227                                          | -0.06 |
| SOGA1          | suppressor of glucose, autophagy associated 1          | -0.06 |
| IFFO2          | intermediate filament family orphan 2                  | -0.04 |
| TINAGL1        | tubulointerstitial nephritis antigen like 1            | -0.04 |
| LINC01135      | long intergenic non-protein coding RNA 1135            | -0.04 |
| LINC01132      | long intergenic non-protein coding RNA 1132            | -0.04 |
| LINC01132      | long intergenic non-protein coding RNA 1132            | -0.04 |
| CCDC12         | coiled-coil domain containing 12                       | -0.04 |
| LOC153684      | uncharacterized LOC153684                              | -0.04 |
| DUSP1          | dual specificity phosphatase 1                         | -0.04 |
| BMPER          | BMP binding endothelial regulator                      | -0.04 |
| VOPP1          | VOPP1, WBP1/VOPP1 family member                        | -0.04 |
| TONSL          | tonsoku like, DNA repair protein                       | -0.04 |
| NFIB           | nuclear factor I B                                     | -0.04 |
| DAPK1          | death associated protein kinase 1                      | -0.04 |
| DDIT4          | DNA damage inducible transcript 4                      | -0.04 |
| TSPAN14        | tetraspanin 14                                         | -0.04 |
| AHNAK          | AHNAK nucleoprotein                                    | -0.04 |
| NECTIN2        | nectin cell adhesion molecule 2                        | -0.04 |
| RTEL1-TNFRSF6B | RTEL1-TNFRSF6B readthrough (NMD candidate)             | -0.04 |
| CARD10         | caspase recruitment domain family member 10            | -0.04 |
| PDGFB          | platelet derived growth factor subunit B               | -0.04 |
| LMNA           | lamin A/C                                              | -0.03 |
| CFLAR-AS1      | CFLAR antisense RNA 1                                  | -0.03 |

|                 |                                                                                         |       |
|-----------------|-----------------------------------------------------------------------------------------|-------|
| BHLHE40-AS1     | BHLHE40 antisense RNA 1                                                                 | -0.03 |
| TREX1           | three prime repair exonuclease 1                                                        | -0.03 |
| AFF1            | AF4/FMR2 family member 1                                                                | -0.03 |
| TNIP1           | TNFAIP3 interacting protein 1                                                           | -0.03 |
| ATP6V1G2-DDX39B | ATP6V1G2-DDX39B readthrough (NMD candidate)                                             | -0.03 |
| DNAJB12         | DnaJ heat shock protein family (Hsp40) member B12                                       | -0.03 |
| ZMIZ1-AS1       | ZMIZ1 antisense RNA 1                                                                   | -0.03 |
| UBASH3B         | ubiquitin associated and SH3 domain containing B                                        | -0.03 |
| SENCR           | smooth muscle and endothelial cell enriched migration/differentiation-associated lncRNA | -0.03 |
| SSH1            | slingshot protein phosphatase 1                                                         | -0.03 |
| NCOR2           | nuclear receptor corepressor 2                                                          | -0.03 |
| ZFP36L1         | ZFP36 ring finger protein like 1                                                        | -0.03 |
| CCDC9B          | coiled-coil domain containing 9B                                                        | -0.03 |
| ERI2            | ERI1 exoribonuclease family member 2                                                    | -0.03 |
| TK2             | thymidine kinase 2, mitochondrial                                                       | -0.03 |
| BCAR1           | BCAR1, Cas family scaffolding protein                                                   | -0.03 |
| LOC284454       | uncharacterized LOC284454                                                               | -0.03 |
| GRAMD1A         | GRAM domain containing 1A                                                               | -0.03 |
| COL18A1         | collagen type XVIII alpha 1 chain                                                       | -0.03 |
| ZNF436-AS1      | ZNF436 antisense RNA 1                                                                  | -0.01 |
| PDE4B           | phosphodiesterase 4B                                                                    | -0.01 |
| LRRC8C          | leucine rich repeat containing 8 VRAC subunit C                                         | -0.01 |
| SNED1           | sushi, nidogen and EGF like domains 1                                                   | -0.01 |
| POMGNT2         | protein O-linked mannose N-acetylglucosaminyltransferase 2 (beta 1,4-)                  | -0.01 |
| ITGB5           | integrin subunit beta 5                                                                 | -0.01 |
| XXYLT1-AS2      | XXYLT1 antisense RNA 2                                                                  | -0.01 |
| ARHGAP24        | Rho GTPase activating protein 24                                                        | -0.01 |
| LAMA4           | laminin subunit alpha 4                                                                 | -0.01 |
| HOXA-AS3        | HOXA cluster antisense RNA 3                                                            | -0.01 |
| TACC1           | transforming acidic coiled-coil containing protein 1                                    | -0.01 |
| AZIN1           | antizyme inhibitor 1                                                                    | -0.01 |
| FAM129B         | family with sequence similarity 129 member B                                            | -0.01 |
| POLR2L          | RNA polymerase II subunit L                                                             | -0.01 |
| AMN1            | antagonist of mitotic exit network 1 homolog                                            | -0.01 |
| SMAD6           | SMAD family member 6                                                                    | -0.01 |
| RAI1            | retinoic acid induced 1                                                                 | -0.01 |
| STK11           | serine/threonine kinase 11                                                              | -0.01 |
| ARRDC2          | arrestin domain containing 2                                                            | -0.01 |
| CBX7            | chromobox 7                                                                             | -0.01 |
| FHL3            | four and a half LIM domains 3                                                           | 0.00  |
| ZFP36L2         | ZFP36 ring finger protein like 2                                                        | 0.00  |
| MIR26B          | microRNA 26b                                                                            | 0.00  |
| AMOTL2          | angiominin like 2                                                                       | 0.00  |
| SOX4            | SRY-box 4                                                                               | 0.00  |
| IL6             | interleukin 6                                                                           | 0.00  |
| NOS3            | nitric oxide synthase 3                                                                 | 0.00  |
| LINC00589       | long intergenic non-protein coding RNA 589                                              | 0.00  |
| PDCD1LG2        | programmed cell death 1 ligand 2                                                        | 0.00  |
| PRRC2B          | proline rich coiled-coil 2B                                                             | 0.00  |
| GATA3           | GATA binding protein 3                                                                  | 0.00  |
| TRDMT1          | tRNA aspartic acid methyltransferase 1                                                  | 0.00  |
| NRP1            | neuropilin 1                                                                            | 0.00  |
| ZMIZ1-AS1       | ZMIZ1 antisense RNA 1                                                                   | 0.00  |
| MIR4691         | microRNA 4691                                                                           | 0.00  |
| PXN             | paxillin                                                                                | 0.00  |
| CDH5            | cadherin 5                                                                              | 0.00  |
| PSMB3           | proteasome subunit beta 3                                                               | 0.00  |
| RNF213          | ring finger protein 213                                                                 | 0.00  |
| TGIF1           | TGFB induced factor homeobox 1                                                          | 0.00  |
| SBNO2           | strawberry notch homolog 2                                                              | 0.00  |
| GPI             | glucose-6-phosphate isomerase                                                           | 0.00  |
| PARVB           | parvin beta                                                                             | 0.00  |
| LOC100506801    | uncharacterized LOC100506801                                                            | 0.01  |
| S1PR1           | sphingosine-1-phosphate receptor 1                                                      | 0.01  |
| RASSF1          | Ras association domain family member 1                                                  | 0.01  |
| MECOM           | MDS1 and EVI1 complex locus                                                             | 0.01  |
| BDH1            | 3-hydroxybutyrate dehydrogenase 1                                                       | 0.01  |
| LOC648987       | uncharacterized LOC648987                                                               | 0.01  |
| PDLIM4          | PDZ and LIM domain 4                                                                    | 0.01  |
| ARAP3           | ArfGAP with RhoGAP domain, ankyrin repeat and PH domain 3                               | 0.01  |
| FLOT1           | flotillin 1                                                                             | 0.01  |
| SUFU            | SUFU negative regulator of hedgehog signaling                                           | 0.01  |



|               |                                                                                        |      |
|---------------|----------------------------------------------------------------------------------------|------|
| BAG3          | BCL2 associated athanogene 3                                                           | 0.01 |
| CTNND1        | catenin delta 1                                                                        | 0.01 |
| C15orf53      | chromosome 15 open reading frame 53                                                    | 0.01 |
| MNT           | MAX network transcriptional repressor                                                  | 0.01 |
| PICART1       | p53-inducible cancer-associated RNA transcript 1                                       | 0.01 |
| PECAM1        | platelet and endothelial cell adhesion molecule 1                                      | 0.01 |
| FKBP1A-SDCBP2 | FKBP1A-SDCBP2 readthrough (NMD candidate)                                              | 0.01 |
| LOC100131496  | uncharacterized LOC100131496                                                           | 0.01 |
| CTSZ          | cathepsin Z                                                                            | 0.01 |
| FBXW4P1       | F-box and WD repeat domain containing 4 pseudogene 1                                   | 0.01 |
| PLXNB2        | plexin B2                                                                              | 0.01 |
| DHRS3         | dehydrogenase/reductase 3                                                              | 0.03 |
| HSPG2         | heparan sulfate proteoglycan 2                                                         | 0.03 |
| LINC01135     | long intergenic non-protein coding RNA 1135                                            | 0.03 |
| SNORA14B      | small nucleolar RNA, H/ACA box 14B                                                     | 0.03 |
| ANKRD28       | ankyrin repeat domain 28                                                               | 0.03 |
| TMEM212       | transmembrane protein 212                                                              | 0.03 |
| MGAT4B        | mannosyl (alpha-1,3-)-glycoprotein beta-1,4-N-acetylglucosaminyltransferase, isozyme B | 0.03 |
| CPNE5         | copine 5                                                                               | 0.03 |
| HSPB1         | heat shock protein family B (small) member 1                                           | 0.03 |
| PTK2          | protein tyrosine kinase 2                                                              | 0.03 |
| ITPRIP        | inositol 1,4,5-trisphosphate receptor interacting protein                              | 0.03 |
| ROBO4         | roundabout guidance receptor 4                                                         | 0.03 |
| IFFO1         | intermediate filament family orphan 1                                                  | 0.03 |
| MMP14         | matrix metalloproteinase 14                                                            | 0.03 |
| ACTN1-AS1     | ACTN1 antisense RNA 1                                                                  | 0.03 |
| EML1          | echinoderm microtubule associated protein like 1                                       | 0.03 |
| AHNAK2        | AHNAK nucleoprotein 2                                                                  | 0.03 |
| MIR1469       | microRNA 1469                                                                          | 0.03 |
| LOC729683     | uncharacterized LOC729683                                                              | 0.03 |
| DLGAP1-AS1    | DLGAP1 antisense RNA 1                                                                 | 0.03 |
| CSRP1         | cysteine and glycine rich protein 1                                                    | 0.04 |
| KLF7          | Kruppel like factor 7                                                                  | 0.04 |
| PXDC1         | PX domain containing 1                                                                 | 0.04 |
| BMP6          | bone morphogenetic protein 6                                                           | 0.04 |
| MIR1322       | microRNA 1322                                                                          | 0.04 |
| KANK1         | KN motif and ankyrin repeat domains 1                                                  | 0.04 |
| RGS3          | regulator of G protein signaling 3                                                     | 0.04 |
| PRPF18        | pre-mRNA processing factor 18                                                          | 0.04 |
| FRMD4A        | FERM domain containing 4A                                                              | 0.04 |
| PSMC3         | proteasome 26S subunit, ATPase 3                                                       | 0.04 |
| ETV6          | ETS variant 6                                                                          | 0.04 |
| CDK17         | cyclin dependent kinase 17                                                             | 0.04 |
| MBNL2         | muscleblind like splicing regulator 2                                                  | 0.04 |
| RASA3         | RAS p21 protein activator 3                                                            | 0.04 |
| RASA3         | RAS p21 protein activator 3                                                            | 0.04 |
| PRRT2         | proline rich transmembrane protein 2                                                   | 0.04 |
| LASP1         | LIM and SH3 protein 1                                                                  | 0.04 |
| CDC42EP4      | CDC42 effector protein 4                                                               | 0.04 |
| ITGB4         | integrin subunit beta 4                                                                | 0.04 |
| GGT5          | gamma-glutamyltransferase 5                                                            | 0.04 |
| CDC42EP1      | CDC42 effector protein 1                                                               | 0.04 |
| LOC730668     | dynein heavy chain -like pseudogene                                                    | 0.04 |
| TGFBR2        | transforming growth factor beta receptor 2                                             | 0.06 |
| NEDD9         | neural precursor cell expressed, developmentally down-regulated 9                      | 0.06 |
| PNMA2         | PNMA family member 2                                                                   | 0.06 |
| MIR4669       | microRNA 4669                                                                          | 0.06 |
| FRMD4A        | FERM domain containing 4A                                                              | 0.06 |
| FAM107B       | family with sequence similarity 107 member B                                           | 0.06 |
| ZNF438        | zinc finger protein 438                                                                | 0.06 |
| VWF           | von Willebrand factor                                                                  | 0.06 |
| EMP1          | epithelial membrane protein 1                                                          | 0.06 |
| KRT80         | keratin 80                                                                             | 0.06 |
| DUSP6         | dual specificity phosphatase 6                                                         | 0.06 |
| COL4A1        | collagen type IV alpha 1 chain                                                         | 0.06 |
| MIR4710       | microRNA 4710                                                                          | 0.06 |
| RNF166        | ring finger protein 166                                                                | 0.06 |
| PITPNA        | phosphatidylinositol transfer protein alpha                                            | 0.06 |
| SREBF1        | sterol regulatory element binding transcription factor 1                               | 0.06 |
| STAT5A        | signal transducer and activator of transcription 5A                                    | 0.06 |
| MIR5010       | microRNA 5010                                                                          | 0.06 |
| KPNA2         | karyopherin subunit alpha 2                                                            | 0.06 |

|              |                                                                             |      |
|--------------|-----------------------------------------------------------------------------|------|
| RPTOR        | regulatory associated protein of MTOR complex 1                             | 0.06 |
| ELL          | elongation factor for RNA polymerase II                                     | 0.06 |
| ERG          | ERG, ETS transcription factor                                               | 0.06 |
| CROCC        | ciliary rootlet coiled-coil, rootletin                                      | 0.07 |
| MCL1         | MCL1, BCL2 family apoptosis regulator                                       | 0.07 |
| GATA2        | GATA binding protein 2                                                      | 0.07 |
| LINC01565    | long intergenic non-protein coding RNA 1565                                 | 0.07 |
| KDR          | kinase insert domain receptor                                               | 0.07 |
| ARHGEF28     | Rho guanine nucleotide exchange factor 28                                   | 0.07 |
| FOXK1        | forkhead box K1                                                             | 0.07 |
| CAPZA2       | capping actin protein of muscle Z-line alpha subunit 2                      | 0.07 |
| B4GALT1      | beta-1,4-galactosyltransferase 1                                            | 0.07 |
| LOC100133920 | methylenetetrahydrofolate dehydrogenase (NADP+ dependent) 1 like pseudogene | 0.07 |
| MIR4672      | microRNA 4672                                                               | 0.07 |
| TNKS1BP1     | tankyrase 1 binding protein 1                                               | 0.07 |
| FOXC2        | forkhead box C2                                                             | 0.07 |
| SLC7A5       | solute carrier family 7 member 5                                            | 0.07 |
| MYL12B       | myosin light chain 12B                                                      | 0.07 |
| HM13-AS1     | HM13 antisense RNA 1                                                        | 0.07 |
| C21orf33     | chromosome 21 open reading frame 33                                         | 0.07 |
| TACSTD2      | tumor associated calcium signal transducer 2                                | 0.08 |
| GADD45A      | growth arrest and DNA damage inducible alpha                                | 0.08 |
| HDGF         | heparin binding growth factor                                               | 0.08 |
| CAVIN2       | caveolae associated protein 2                                               | 0.08 |
| AP2M1        | adaptor related protein complex 2 mu 1 subunit                              | 0.08 |
| ANKRD55      | ankyrin repeat domain 55                                                    | 0.08 |
| PLEC         | plectin                                                                     | 0.08 |
| NINJ1        | ninjurin 1                                                                  | 0.08 |
| PHLDB1       | pleckstrin homology like domain family B member 1                           | 0.08 |
| CDK17        | cyclin dependent kinase 17                                                  | 0.08 |
| NFKBIA       | NFKB inhibitor alpha                                                        | 0.08 |
| SMAD6        | SMAD family member 6                                                        | 0.08 |
| KCNN4        | potassium calcium-activated channel subfamily N member 4                    | 0.08 |
| BCL3         | B-cell CLL/lymphoma 3                                                       | 0.08 |
| BCL2L1       | BCL2 like 1                                                                 | 0.08 |
| SEC14L2      | SEC14 like lipid binding 2                                                  | 0.08 |
| SSC4D        | scavenger receptor cysteine rich family member with 4 domains               | 0.10 |
| UBE2H        | ubiquitin conjugating enzyme E2 H                                           | 0.10 |
| PDGFRL       | platelet derived growth factor receptor like                                | 0.10 |
| SLC25A37     | solute carrier family 25 member 37                                          | 0.10 |
| VAV2         | vav guanine nucleotide exchange factor 2                                    | 0.10 |
| ANKRD2       | ankyrin repeat domain 2                                                     | 0.10 |
| MICAL2       | microtubule associated monooxygenase, calponin and LIM domain containing 2  | 0.10 |
| MIR4693      | microRNA 4693                                                               | 0.10 |
| NINJ2        | ninjurin 2                                                                  | 0.10 |
| ITGA5        | integrin subunit alpha 5                                                    | 0.10 |
| MIR5580      | microRNA 5580                                                               | 0.10 |
| MIR4505      | microRNA 4505                                                               | 0.10 |
| TXNRD2       | thioredoxin reductase 2                                                     | 0.10 |
| LIMK2        | LIM domain kinase 2                                                         | 0.10 |
| SH3BP4       | SH3 domain binding protein 4                                                | 0.11 |
| LOC100506178 | uncharacterized LOC100506178                                                | 0.11 |
| CAV2         | caveolin 2                                                                  | 0.11 |
| MIR1207      | microRNA 1207                                                               | 0.11 |
| MYOF         | myoferlin                                                                   | 0.11 |
| DKK3         | dickkopf WNT signaling pathway inhibitor 3                                  | 0.11 |
| C11orf91     | chromosome 11 open reading frame 91                                         | 0.11 |
| RPSAP52      | ribosomal protein SA pseudogene 52                                          | 0.11 |
| AJUBA        | ajuba LIM protein                                                           | 0.11 |
| ZBTB7A       | zinc finger and BTB domain containing 7A                                    | 0.11 |
| ERF          | ETS2 repressor factor                                                       | 0.11 |
| CLDN14       | claudin 14                                                                  | 0.11 |
| COL18A1-AS2  | COL18A1 antisense RNA 2                                                     | 0.11 |
| LOC100129534 | small nuclear ribonucleoprotein polypeptide N pseudogene                    | 0.12 |
| EPHA2        | EPH receptor A2                                                             | 0.12 |
| LOC100129046 | uncharacterized LOC100129046                                                | 0.12 |
| FOSL2        | FOS like 2, AP-1 transcription factor subunit                               | 0.12 |
| TTYH3        | tweety family member 3                                                      | 0.12 |
| UHRF2        | ubiquitin like with PHD and ring finger domains 2                           | 0.12 |
| PTPRE        | protein tyrosine phosphatase, receptor type E                               | 0.12 |
| C12orf75     | chromosome 12 open reading frame 75                                         | 0.12 |
| MPG          | N-methylpurine DNA glycosylase                                              | 0.12 |

|                |                                                                              |      |
|----------------|------------------------------------------------------------------------------|------|
| JUNB           | JunB proto-oncogene, AP-1 transcription factor subunit                       | 0.12 |
| CAPN12         | calpain 12                                                                   | 0.12 |
| RTKL1-TNFRSF6B | RTKL1-TNFRSF6B readthrough (NMD candidate)                                   | 0.12 |
| RNF19B         | ring finger protein 19B                                                      | 0.14 |
| ARHGAP29       | Rho GTPase activating protein 29                                             | 0.14 |
| PALMD          | palmdelphin                                                                  | 0.14 |
| PLXNA2         | plexin A2                                                                    | 0.14 |
| MGAT5          | mannosyl (alpha-1,6-)-glycoprotein beta-1,6-N-acetyl-glucosaminyltransferase | 0.14 |
| ZNF366         | zinc finger protein 366                                                      | 0.14 |
| PARP12         | poly(ADP-ribose) polymerase family member 12                                 | 0.14 |
| MTUS1          | microtubule associated scaffold protein 1                                    | 0.14 |
| IL15RA         | interleukin 15 receptor subunit alpha                                        | 0.14 |
| CORO1C         | coronin 1C                                                                   | 0.14 |
| MIR4316        | microRNA 4316                                                                | 0.14 |
| INO80C         | INO80 complex subunit C                                                      | 0.14 |
| GPX4           | glutathione peroxidase 4                                                     | 0.14 |
| SMIM24         | small integral membrane protein 24                                           | 0.14 |
| MIR3189        | microRNA 3189                                                                | 0.14 |
| NOL4L          | nucleolar protein 4 like                                                     | 0.14 |
| MYH9           | myosin heavy chain 9                                                         | 0.14 |
| MRPL37         | mitochondrial ribosomal protein L37                                          | 0.15 |
| LINC01119      | long intergenic non-protein coding RNA 1119                                  | 0.15 |
| LIMS1          | LIM zinc finger domain containing 1                                          | 0.15 |
| SNRK-AS1       | SNRK antisense RNA 1                                                         | 0.15 |
| FLNB           | filamin B                                                                    | 0.15 |
| UQCC2          | ubiquinol-cytochrome c reductase complex assembly factor 2                   | 0.15 |
| SYNJ2-IT1      | SYNJ2 intronic transcript 1                                                  | 0.15 |
| NOD1           | nucleotide binding oligomerization domain containing 1                       | 0.15 |
| MIR1205        | microRNA 1205                                                                | 0.15 |
| HK1            | hexokinase 1                                                                 | 0.15 |
| EXOC6          | exocyst complex component 6                                                  | 0.15 |
| KHNYN          | KH and NYN domain containing                                                 | 0.15 |
| TTC7B          | tetratricopeptide repeat domain 7B                                           | 0.15 |
| CENPN          | centromere protein N                                                         | 0.15 |
| ENO3           | enolase 3                                                                    | 0.15 |
| SH3GL1         | SH3 domain containing GRB2 like 1, endophilin A2                             | 0.15 |
| SDCBP2-AS1     | SDCBP2 antisense RNA 1                                                       | 0.15 |
| TGM2           | transglutaminase 2                                                           | 0.15 |
| NRP2           | neuropilin 2                                                                 | 0.16 |
| SLC29A1        | solute carrier family 29 member 1 (Augustine blood group)                    | 0.16 |
| SERPINE1       | serpin family E member 1                                                     | 0.16 |
| ARHGAP22       | Rho GTPase activating protein 22                                             | 0.16 |
| SAMD4A         | sterile alpha motif domain containing 4A                                     | 0.16 |
| SPHK1          | sphingosine kinase 1                                                         | 0.16 |
| SPC24          | SPC24, NDC80 kinetochore complex component                                   | 0.16 |
| SSBP4          | single stranded DNA binding protein 4                                        | 0.16 |
| MIR3619        | microRNA 3619                                                                | 0.16 |
| TRAPPC3        | trafficking protein particle complex 3                                       | 0.18 |
| EVA1B          | eva-1 homolog B                                                              | 0.18 |
| WWTR1-AS1      | WWTR1 antisense RNA 1                                                        | 0.18 |
| CTSB           | cathepsin B                                                                  | 0.18 |
| TM2D2          | TM2 domain containing 2                                                      | 0.18 |
| MIR5094        | microRNA 5094                                                                | 0.18 |
| PIEZO1         | piezo type mechanosensitive ion channel component 1                          | 0.18 |
| GATA6-AS1      | GATA6 antisense RNA 1 (head to head)                                         | 0.18 |
| LINC00184      | long intergenic non-protein coding RNA 184                                   | 0.19 |
| FLJ42351       | uncharacterized LOC400999                                                    | 0.19 |
| SLC6A6         | solute carrier family 6 member 6                                             | 0.19 |
| FLNB           | filamin B                                                                    | 0.19 |
| HOTAIRM1       | HOXA transcript antisense RNA, myeloid-specific 1                            | 0.19 |
| CUBN           | cubilin                                                                      | 0.19 |
| VSIG2          | V-set and immunoglobulin domain containing 2                                 | 0.19 |
| TNFRSF1A       | TNF receptor superfamily member 1A                                           | 0.19 |
| SNTB2          | syntrophin beta 2                                                            | 0.19 |
| ZNF521         | zinc finger protein 521                                                      | 0.19 |
| TMEM189        | transmembrane protein 189                                                    | 0.19 |
| MED15          | mediator complex subunit 15                                                  | 0.19 |
| MACF1          | microtubule-actin crosslinking factor 1                                      | 0.20 |
| PLK3           | polo like kinase 3                                                           | 0.20 |
| LEPR           | leptin receptor                                                              | 0.20 |
| TNFSF18        | TNF superfamily member 18                                                    | 0.20 |
| IRAK2          | interleukin 1 receptor associated kinase 2                                   | 0.20 |

|              |                                                                            |      |
|--------------|----------------------------------------------------------------------------|------|
| MAML3        | mastermind like transcriptional coactivator 3                              | 0.20 |
| SYNPO        | synaptopodin                                                               | 0.20 |
| MTHFD1L      | methylenetetrahydrofolate dehydrogenase (NADP+ dependent) 1 like           | 0.20 |
| CREB3L2      | cAMP responsive element binding protein 3 like 2                           | 0.20 |
| FBXO32       | F-box protein 32                                                           | 0.20 |
| SCD          | stearoyl-CoA desaturase                                                    | 0.20 |
| NCOR2        | nuclear receptor corepressor 2                                             | 0.20 |
| ZFP36L1      | ZFP36 ring finger protein like 1                                           | 0.20 |
| C15orf54     | chromosome 15 open reading frame 54 (putative)                             | 0.20 |
| SMAD3        | SMAD family member 3                                                       | 0.20 |
| PTTG1IP      | PTTG1 interacting protein                                                  | 0.20 |
| TRIOBP       | TRIO and F-actin binding protein                                           | 0.20 |
| FAM50B       | family with sequence similarity 50 member B                                | 0.21 |
| NCOA7        | nuclear receptor coactivator 7                                             | 0.21 |
| MTHFD1L      | methylenetetrahydrofolate dehydrogenase (NADP+ dependent) 1 like           | 0.21 |
| NFIB         | nuclear factor I B                                                         | 0.21 |
| ENG          | endoglin                                                                   | 0.21 |
| PHYHD1       | phytanoyl-CoA dioxygenase domain containing 1                              | 0.21 |
| MIR4492      | microRNA 4492                                                              | 0.21 |
| ETS1         | ETS proto-oncogene 1, transcription factor                                 | 0.21 |
| SLC38A2      | solute carrier family 38 member 2                                          | 0.21 |
| TM6SF1       | transmembrane 6 superfamily member 1                                       | 0.21 |
| RARA         | retinoic acid receptor alpha                                               | 0.21 |
| TPM4         | tropomyosin 4                                                              | 0.21 |
| MIR3191      | microRNA 3191                                                              | 0.21 |
| DDAH1        | dimethylarginine dimethylaminohydrolase 1                                  | 0.23 |
| HS1BP3       | HCLS1 binding protein 3                                                    | 0.23 |
| LOC100288911 | uncharacterized LOC100288911                                               | 0.23 |
| STPG4        | sperm-tail PG-rich repeat containing 4                                     | 0.23 |
| NCRUPAR      | non-protein coding RNA, upstream of F2R/PAR1                               | 0.23 |
| ARMS2        | age-related maculopathy susceptibility 2                                   | 0.23 |
| FTH1         | ferritin heavy chain 1                                                     | 0.23 |
| DDX47        | DEAD-box helicase 47                                                       | 0.23 |
| NCOR2        | nuclear receptor corepressor 2                                             | 0.23 |
| RHOJ         | ras homolog family member J                                                | 0.23 |
| SMG1P3       | SMG1 pseudogene 3                                                          | 0.23 |
| CDH13        | cadherin 13                                                                | 0.23 |
| ITGB3        | integrin subunit beta 3                                                    | 0.23 |
| IGF2BP1      | insulin like growth factor 2 mRNA binding protein 1                        | 0.23 |
| CCDC57       | coiled-coil domain containing 57                                           | 0.23 |
| HAUS7        | HAUS augmin like complex subunit 7                                         | 0.23 |
| TMEM82       | transmembrane protein 82                                                   | 0.24 |
| BCL10        | B-cell CLL/lymphoma 10                                                     | 0.24 |
| EGLN1        | egl-9 family hypoxia inducible factor 1                                    | 0.24 |
| RAI14        | retinoic acid induced 14                                                   | 0.24 |
| INTS1        | integrator complex subunit 1                                               | 0.24 |
| LAMB1        | laminin subunit beta 1                                                     | 0.24 |
| LINC00840    | long intergenic non-protein coding RNA 840                                 | 0.24 |
| KCTD10       | potassium channel tetramerization domain containing 10                     | 0.24 |
| THBS1        | thrombospondin 1                                                           | 0.24 |
| GLIS2        | GLIS family zinc finger 2                                                  | 0.24 |
| SMURF2       | SMAD specific E3 ubiquitin protein ligase 2                                | 0.24 |
| PREX1        | phosphatidylinositol-3,4,5-trisphosphate dependent Rac exchange factor 1   | 0.24 |
| SPSB1        | splA/ryanodine receptor domain and SOCS box containing 1                   | 0.25 |
| CAPN2        | calpain 2                                                                  | 0.25 |
| ARHGAP18     | Rho GTPase activating protein 18                                           | 0.25 |
| SBF2-AS1     | SBF2 antisense RNA 1                                                       | 0.25 |
| IQCD         | IQ motif containing D                                                      | 0.25 |
| SNX29P2      | sorting nexin 29 pseudogene 2                                              | 0.25 |
| SPTBN1       | spectrin beta, non-erythrocytic 1                                          | 0.26 |
| RND3         | Rho family GTPase 3                                                        | 0.26 |
| LRRC8A       | leucine rich repeat containing 8 VRAC subunit A                            | 0.26 |
| MICAL2       | microtubule associated monooxygenase, calponin and LIM domain containing 2 | 0.26 |
| MYEOV        | myeloma overexpressed                                                      | 0.26 |
| MT1A         | metallothionein 1A                                                         | 0.26 |
| MAFF         | MAF bZIP transcription factor F                                            | 0.26 |
| TRIO         | trio Rho guanine nucleotide exchange factor                                | 0.28 |
| LINC00963    | long intergenic non-protein coding RNA 963                                 | 0.28 |
| COL4A2       | collagen type IV alpha 2 chain                                             | 0.28 |
| IRF2BP1      | interferon regulatory factor 2 binding protein like                        | 0.28 |
| GADD45B      | growth arrest and DNA damage inducible beta                                | 0.28 |
| BACE2        | beta-site APP-cleaving enzyme 2                                            | 0.28 |

|            |                                                                       |      |
|------------|-----------------------------------------------------------------------|------|
| C1orf100   | chromosome 1 open reading frame 100                                   | 0.29 |
| CSRNP1     | cysteine and serine rich nuclear protein 1                            | 0.29 |
| SCAMP1     | secretory carrier membrane protein 1                                  | 0.29 |
| SNORD124   | small nucleolar RNA, C/D box 124                                      | 0.29 |
| SMIM29     | small integral membrane protein 29                                    | 0.30 |
| BICD2      | BICD cargo adaptor 2                                                  | 0.30 |
| WBP1L      | VW domain binding protein 1 like                                      | 0.30 |
| TPP1       | tripeptidyl peptidase 1                                               | 0.30 |
| NNMT       | nicotinamide N-methyltransferase                                      | 0.30 |
| ABCC1      | ATP binding cassette subfamily C member 1                             | 0.30 |
| PIR-FIGF   | PIR-FIGF readthrough                                                  | 0.30 |
| ERRF1      | ERBB receptor feedback inhibitor 1                                    | 0.31 |
| MIR4684    | microRNA 4684                                                         | 0.31 |
| NISCH      | nischarin                                                             | 0.31 |
| FOXP1      | forkhead box P1                                                       | 0.31 |
| MIR3138    | microRNA 3138                                                         | 0.31 |
| JADE2      | jade family PHD finger 2                                              | 0.31 |
| ZYX        | zyxin                                                                 | 0.31 |
| STK24      | serine/threonine kinase 24                                            | 0.31 |
| ANXA2      | annexin A2                                                            | 0.31 |
| AFAP1      | actin filament associated protein 1                                   | 0.32 |
| LINC00607  | long intergenic non-protein coding RNA 607                            | 0.33 |
| DAP        | death associated protein                                              | 0.33 |
| ZSWIM6     | zinc finger SWIM-type containing 6                                    | 0.33 |
| HRH1       | histamine receptor H1                                                 | 0.34 |
| TBC1D2     | TBC1 domain family member 2                                           | 0.34 |
| ME3        | malic enzyme 3                                                        | 0.34 |
| LYL1       | LYL1, basic helix-loop-helix family member                            | 0.34 |
| CCDC97     | coiled-coil domain containing 97                                      | 0.34 |
| MIR216B    | microRNA 216b                                                         | 0.36 |
| PTPN1      | protein tyrosine phosphatase, non-receptor type 1                     | 0.36 |
| TMBIM1     | transmembrane BAX inhibitor motif containing 1                        | 0.37 |
| ARMC9      | armadillo repeat containing 9                                         | 0.37 |
| ACTN1-AS1  | ACTN1 antisense RNA 1                                                 | 0.37 |
| MAP3K14    | mitogen-activated protein kinase kinase kinase 14                     | 0.37 |
| TBC1D22A   | TBC1 domain family member 22A                                         | 0.37 |
| HHIP       | hedgehog interacting protein                                          | 0.38 |
| NEK6       | NIMA related kinase 6                                                 | 0.38 |
| CCDC81     | coiled-coil domain containing 81                                      | 0.38 |
| NCOR2      | nuclear receptor corepressor 2                                        | 0.38 |
| TANC1      | tetratricopeptide repeat, ankyrin repeat and coiled-coil containing 1 | 0.39 |
| PLAT       | plasminogen activator, tissue type                                    | 0.39 |
| MIR1204    | microRNA 1204                                                         | 0.39 |
| SMG6       | SMG6, nonsense mediated mRNA decay factor                             | 0.39 |
| DLC1       | DLC1 Rho GTPase activating protein                                    | 0.40 |
| TKT        | transketolase                                                         | 0.41 |
| TMEM170B   | transmembrane protein 170B                                            | 0.41 |
| COL13A1    | collagen type XIII alpha 1 chain                                      | 0.41 |
| TRAM2      | translocation associated membrane protein 2                           | 0.42 |
| NA         | NA                                                                    | 0.42 |
| ZNF469     | zinc finger protein 469                                               | 0.42 |
| ADTRP      | androgen dependent TFPI regulating protein                            | 0.43 |
| RALA       | RAS like proto-oncogene A                                             | 0.44 |
| EHD1       | EH domain containing 1                                                | 0.44 |
| CLCF1      | cardiotrophin like cytokine factor 1                                  | 0.44 |
| DNMBP-AS1  | DNMBP antisense RNA 1                                                 | 0.45 |
| C15orf54   | chromosome 15 open reading frame 54 (putative)                        | 0.45 |
| KIRREL1    | kirre like nephrin family adhesion molecule 1                         | 0.46 |
| TANC1      | tetratricopeptide repeat, ankyrin repeat and coiled-coil containing 1 | 0.46 |
| TMEM65     | transmembrane protein 65                                              | 0.46 |
| PFKP       | phosphofructokinase, platelet                                         | 0.46 |
| PLCB3      | phospholipase C beta 3                                                | 0.46 |
| PTPRE      | protein tyrosine phosphatase, receptor type E                         | 0.48 |
| LTBP2      | latent transforming growth factor beta binding protein 2              | 0.48 |
| IGFBP7-AS1 | IGFBP7 antisense RNA 1                                                | 0.49 |
| MIR4668    | microRNA 4668                                                         | 0.49 |
| MIR21      | microRNA 21                                                           | 0.51 |
| MLL1       | MLL1, super elongation complex subunit                                | 0.53 |
| BCAR3      | BCAR3, NSP family adaptor protein                                     | 0.56 |
| EVA1C      | eva-1 homolog C                                                       | 0.56 |
| MIR4305    | microRNA 4305                                                         | 0.57 |
| EFEMP1     | EGF containing fibulin extracellular matrix protein 1                 | 0.58 |

|          |                                                               |       |
|----------|---------------------------------------------------------------|-------|
| FHL2     | four and a half LIM domains 2                                 | 0.58  |
| FLRT2    | fibronectin leucine rich transmembrane protein 2              | 0.59  |
| TRERNA1  | translation regulatory long non-coding RNA 1                  | 0.59  |
| ZBTB17   | zinc finger and BTB domain containing 17                      | 0.62  |
| DPP9     | dipeptidyl peptidase 9                                        | 0.62  |
| SZT2     | SZT2, KICSTOR complex subunit                                 | 0.63  |
| F2RL1    | F2R like trypsin receptor 1                                   | 0.63  |
| FOXL1    | forkhead box L1                                               | 0.63  |
| PDLIM7   | PDZ and LIM domain 7                                          | 0.64  |
| SPSB1    | splA/ryanodine receptor domain and SOCS box containing 1      | 0.77  |
| NPLOC4   | NPL4 homolog, ubiquitin recognition factor                    | 0.78  |
| PIP5K1P1 | phosphatidylinositol-4-phosphate 5-kinase type 1 pseudogene 1 | 0.84  |
| MIR3658  | microRNA 3658                                                 | 0.85  |
| MMP2     | matrix metalloproteinase 2                                    | 0.88  |
| TXNDC5   | thioredoxin domain containing 5                               | 1.00  |
|          |                                                               | -1.85 |

**Online Table IX: Sequencing and transcriptional data used in this study.**  
Information on the ChIP-seq, DNase-seq and microarray transcriptional datasets publicly accessed or generated.

| Experiment              | Factor   | Cell type | Condition     | GEO ID                                              | Lab                                                |
|-------------------------|----------|-----------|---------------|-----------------------------------------------------|----------------------------------------------------|
| ChIP-seq                | ERG      | HUVEC     | untreated     | GSM3557980 (This paper)                             | Anna Randi, Imperial College London                |
| ChIP-seq                | ERG      | VCaP      | untreated     | GSM717395                                           | Edwin Cheung, Genome Institute of Singapore        |
| ChIP-seq                | ERG      | VCaP      | untreated     | GSM353637                                           | Arul Chinnaiyan, Northwestern University           |
| DNaseI hypersensitivity |          | HUVEC     | untreated     | GSM816646                                           | Greg Crawford, Duke University                     |
| ChIP-seq                | H3K27ac  | HUVEC     | untreated     | GSM733691                                           | Bradley Bernstein, Broad Institute                 |
| ChIP-seq                | H3K4me1  | HUVEC     | untreated     | GSM733690                                           | Bradley Bernstein, Broad Institute                 |
| ChIP-seq                | H3K27me3 | HUVEC     | untreated     | GSM733688                                           | Bradley Bernstein, Broad Institute                 |
| ChIP-seq                | H3K27ac  | VCaP      | untreated     | GSM1328982                                          | Arul Chinnaiyan, University of Michigan            |
| ChIP-seq                | H3K4me1  | VCaP      | untreated     | GSM353631                                           | Arul Chinnaiyan, Northwestern University           |
| ChIP-seq                | H3K27me3 | VCaP      | untreated     | GSM353621                                           | Arul Chinnaiyan, Northwestern University           |
| ChIP-seq                | H3K27ac  | HUVEC     | siCtl         | GSM3557982 (This paper)                             | Anna Randi, Imperial College London                |
| ChIP-seq                | H3K27ac  | HUVEC     | siERG         | GSM3557983 (This paper)                             | Anna Randi, Imperial College London                |
| ChIP-seq                | MED1     | HUVEC     | siCtl         | GSM3557984 (This paper)                             | Anna Randi, Imperial College London                |
| ChIP-seq                | MED1     | HUVEC     | siERG         | GSM3557985 (This paper)                             | Anna Randi, Imperial College London                |
| ChIP-seq                | GATA2    | HUVEC     | untreated     | GSM935347                                           | Peggy Farnham, University of South California      |
| ChIP-seq                | cFOS     | HUVEC     | untreated     | GSM935585                                           | Peggy Farnham, University of South California      |
| ChIP-seq                | cJUN     | HUVEC     | untreated     | GSM935278                                           | Peggy Farnham, University of South California      |
| Microarray              |          | HUVEC     | siCtl v siERG | GSE32984 (GSM816988-GSM816990, GSM816985-GSM816987) | Anna Randi, Imperial College London                |
| Microarray              |          | VCaP      | siCtl v siERG | GSE53994 (GSM1305158-GSM1305166)                    | Ralf Kittler, The University of Texas Southwestern |
