# Supplementary material for: The Transcription Factor ERG Regulates Super-Enhancers Associated With an Endothelial-Specific Gene Expression Program
Source: PubMed Central journal article supplement (PMC6493686; doi:10.1161/circresaha.118.313788), 2019-03-20
Supplement: res-124-1337-s002.pdf [file res-124-1337-s002.pdf]

## Gemma Bridges-Lyman

---

**From:** Joan Ponsà Cobas <joan.ponsa.cobas@gmail.com>  
**Sent:** Thursday, March 14, 2019 9:11 AM  
**To:** circres  
**Subject:** CIRCRES/2018/313788DR2: The transcription factor ERG regulates super-enhancers associated with an endothelial-specific gene expression program

**\*\*\* CAUTION:** This email originated from outside of the **American Heart Association**. Do **not** click links or open attachments unless you recognize the sender and know the content is safe. **\*\*\***

To whom it may concern,

I contact you regarding "CIRCRES/2018/313788DR2: The transcription factor ERG regulates super-enhancers associated with an endothelial-specific gene expression program.", to inform that I give permission for my name to be acknowledged.

Regards,

Joan
